# Supplementary material for: An integrative transcriptomics approach identifies miR-503 as a candidate master regulator of the estrogen response in MCF-7 breast cancer cells
Source: PubMed Central journal article supplement (PMC5029456; doi:10.1261/rna.056895.116), 2016-10
Supplement: supp_056895.116_Supplemental_FigS1-S7.pdf [file supp_056895.116_Supplemental_FigS1-S7.pdf]

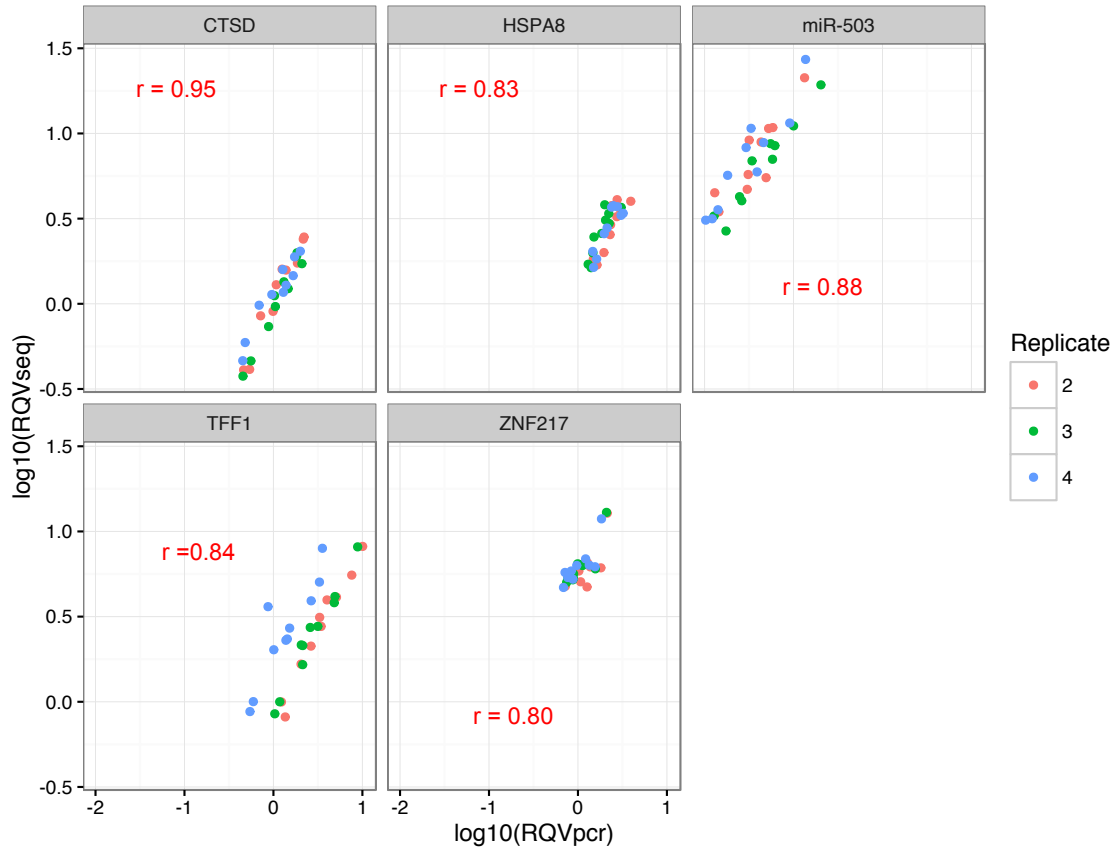

**Figure S1: PCR validation of selected RNAs.** Comparison between the relative quantitative value (RQV) of selected RNAs as measured by high throughput sequencing (y-axis) or RT-qPCR (x-axis). Pearson's correlation value (r) is shown in red on each plot.

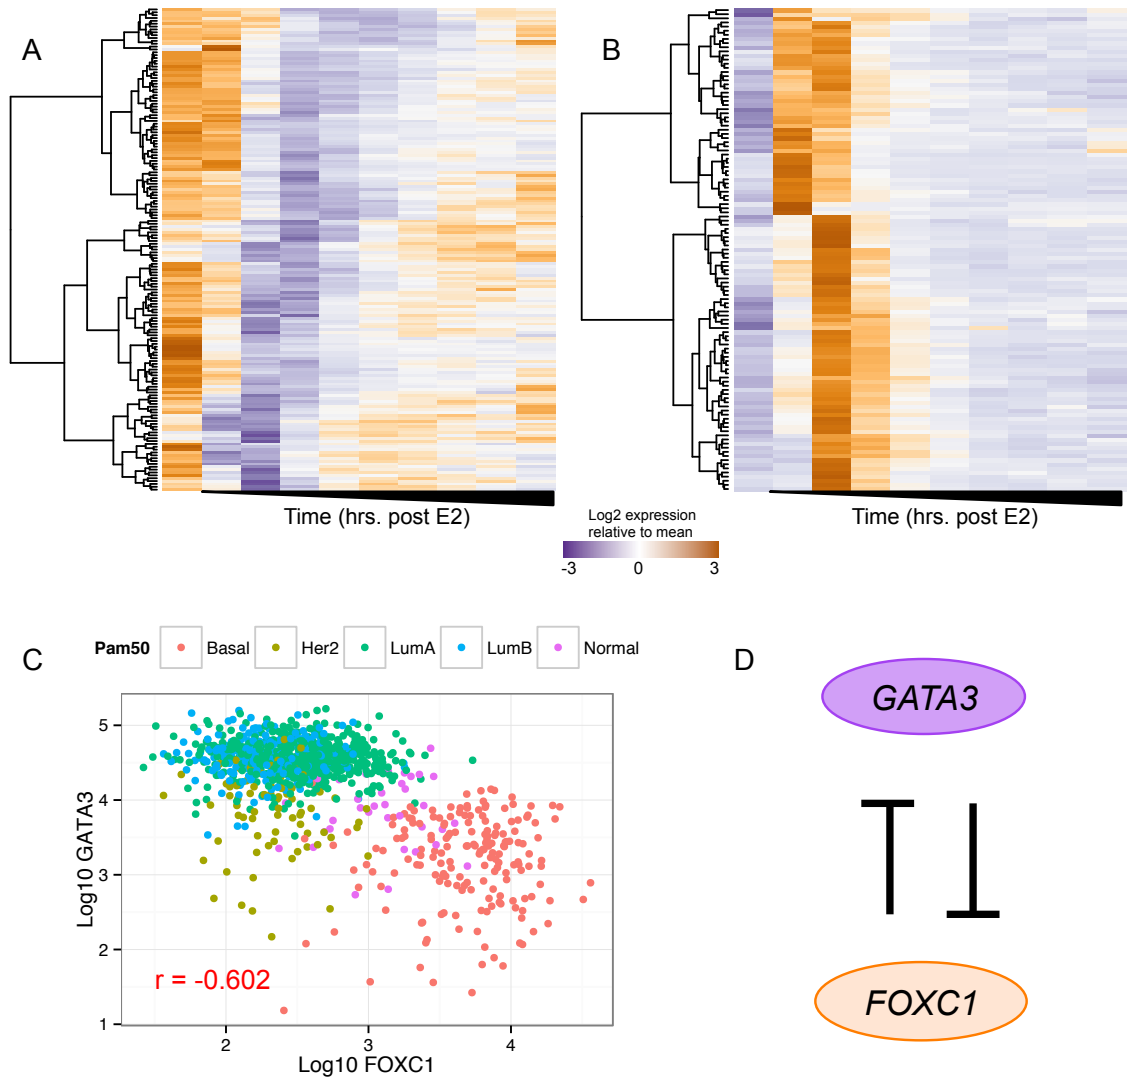

**Figure S2: *GATA3*-like and anti-*GATA3*-like genes.** (A) The expression profile of 170 mRNAs that exhibit an expression pattern similar to *GATA3*. (B) The expression profile of 118 mRNAs that exhibit a pattern of expression opposite of that of *GATA3*. (C) Normalized expression of *GATA3* and *FOXC1* in 1046 samples from The Cancer Genome Atlas breast cancer dataset. Pearson's correlation ( $r$ ) is shown in red. (D) Opposite expression pattern of *GATA3* and *FOXC1* is consistent with a mutual inhibition relationship.

### ChEA binding by p-value ranking

|                                              |            |
|----------------------------------------------|------------|
| SUZ12_20075857_ChIP-Seq_MESC_Mouse           | 2.818e-170 |
| EGR1_20690147_ChIP-Seq_ERYTHROLEUKEMIA_Human | 7.993e-167 |
| HNF4A_19822575_ChIP-Seq_HepG2_Human          | 3.015e-161 |
| ZNF217_24962896_ChIP-Seq_MCF7_Human          | 2.917e-160 |
| MITF_21258399_ChIP-Seq_MELANOMA_Human        | 5.178e-159 |
| WT1_25993318_ChIP-Seq_PODOCYTE_Human         | 3.600e-131 |
| FOXM1_26456572_ChIP-Seq_MCF7_Human           | 9.495e-125 |
| ESR2_21235772_ChIP-Seq_MCF-7_Human           | 1.499e-118 |
| MTF2_20144788_ChIP-Seq_MESC_Mouse            | 5.288e-112 |
| RUNX1_21571218_ChIP-Seq_MEGAKARYOCYTES_Human | 6.654e-110 |

**Figure S3: Top ChEA binding hits for estrogen responsive mRNAs.** The ten most enriched transcription factor binding sites for estrogen responsive mRNAs in our dataset using ChEA. Transcription factors are sorted by p-value ranking.

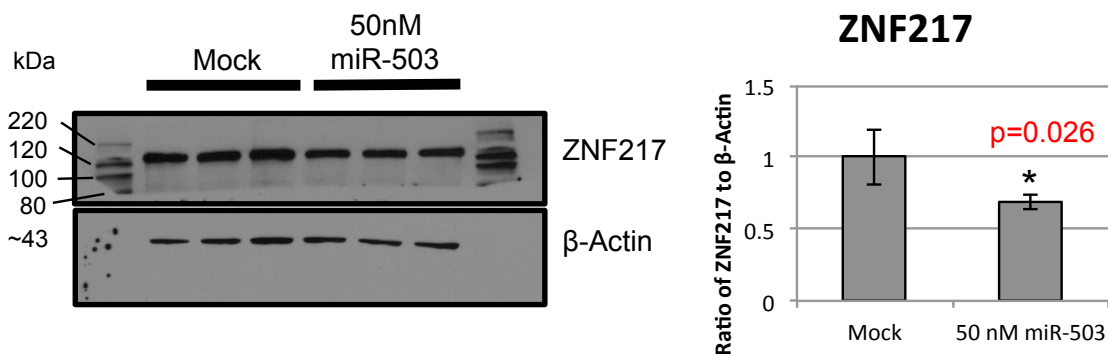

**Figure S4: ZNF217 protein levels in Mock and miR-503 transfected MCF-7 cells.** Western blot showing ZNF217 protein levels in Mock or miR-503 (50nM) transfected MCF-7 cells at 48 hours post transfection. Significance assessed using a 1-tailed Student's t-test.

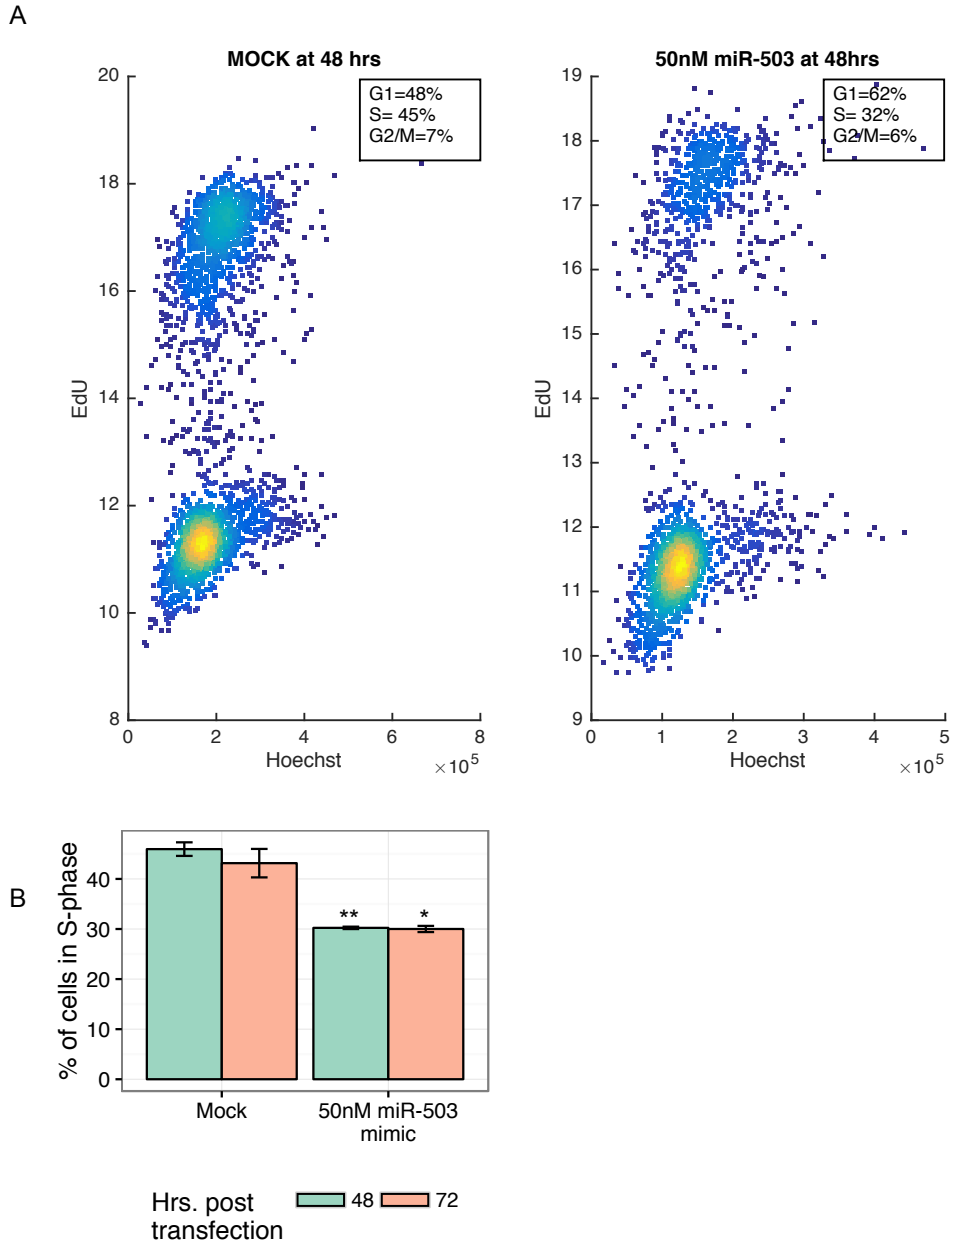

**Figure S5: miR-503/ZNF217 circuit inhibits proliferation.** (A) Total EdU and DNA (Hoechst) fluorescence in cells from Mock or miR-503 (50nM) transfected MCF7 cells. (B) The percentage of MCF7 cells in S-phase during the EdU pulse experiment from Mock or miR-503 (50nM) transfected MCF7 cells at 48 or 72 hours post transfection. Significance assessed using a Student's t-test (\*  $P < 0.05$ , \*\* $P < 0.01$ ).

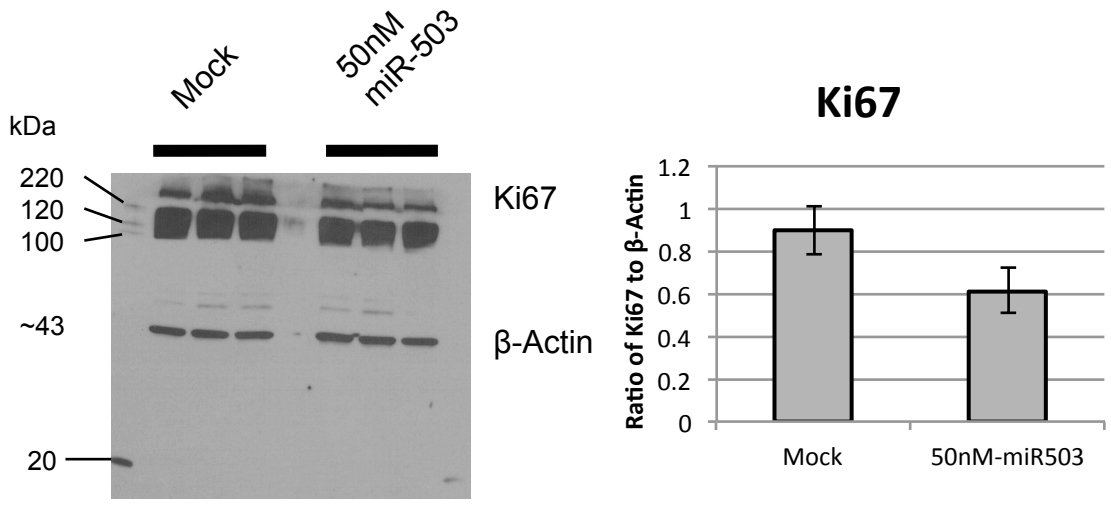

**Figure S6: Ki67 protein levels in Mock and miR-503 transfected MCF7 cells.** Western blot showing Ki67 protein levels in Mock or miR-503 (50nM) transfected MCF7 cells at 72 hours post transfection.

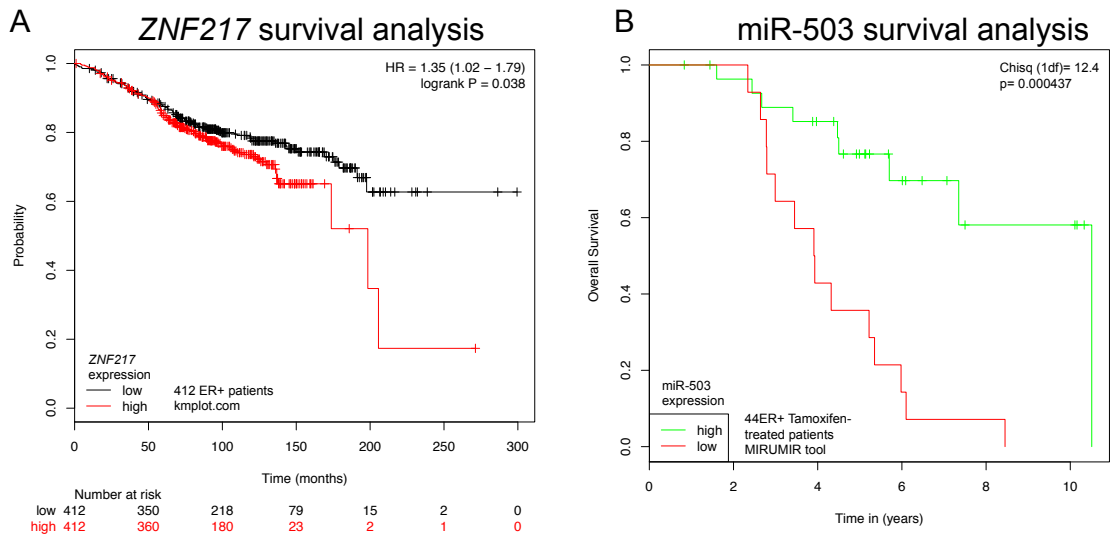

**Figure S7: Association of ZNF217 and miR-503 expression in breast cancer patient cohorts.** (A) Survival analysis of 412 ER+ patients based on ZNF217 high/low status (Fietze et al. 2014; Győrffy et al. 2009). (B) Survival analysis of 44 ER+ tamoxifen treated patients based on miR-503 high/low status (Antonov et al. 2013; Lyng et al. 2012; Antonov 2011).
