# Supplementary material for: An integrative transcriptomics approach identifies miR-503 as a candidate master regulator of the estrogen response in MCF-7 breast cancer cells
Source: RNA. 2016 Oct;22(10):1592–603. doi: 10.1261/rna.056895.116 (PMC5029456; doi:10.1261/rna.056895.116)
Supplement: Supplemental Material [file supp_056895.116_Supplemental_TableS1-S4.xlsx]

## Sheet: Table S1
RNAseq		Sample Name	X2T0R	X3T0R	X4T0R	X2T1R	X3T1R	X4T1R	X2T2R	X3T2R	X4T2R	X2T3R	X3T3R	X4T3R	X2T4R	X3T4R	X4T4R	X2T5R	X3T5R	X4T5R	X2T6R	X3T6R	X4T6R	X2T8R	X3T8R	X4T8R	X2T12R	X3T12R	X4T12R	X2T24R	X3T24R	X4T24R
		Replicate	2	3	4	2	3	4	2	3	4	2	3	4	2	3	4	2	3	4	2	3	4	2	3	4	2	3	4	2	3	4
		Time (hrs post E2)	0	0	0	1	1	1	2	2	2	3	3	3	4	4	4	5	5	5	6	6	6	8	8	8	12	12	12	24	24	24
	By mapping uniqueness	Total reads	75979646	66479864	63235260	52584450	61053584	56252836	81593048	71070488	69094256	62635838	64341422	54935230	65504716	78933450	71759150	75086016	72648052	67454808	62500284	57233416	54702674	54941114	58339802	60351636	68764818	72254878	51419560	69381302	77519474	70257084
		Unique	69676907	60956418	57780429	47895939	56096936	51102745	74981063	65280266	63248550	57657732	59161775	50247560	60001414	72626381	66037056	69001059	66720480	61950179	57387259	52759075	50045582	50399615	53573882	55355436	63201826	66297167	46874107	63691181	70934814	64294605
			0.917	0.9169	0.9137	0.9108	0.9188	0.9084	0.919	0.9185	0.9154	0.9205	0.9195	0.9147	0.916	0.9201	0.9203	0.919	0.9184	0.9184	0.9182	0.9218	0.9149	0.9173	0.9183	0.9172	0.9191	0.9175	0.9116	0.918	0.9151	0.9151
		Multiple	4510071	3922846	4069215	3379793	3552264	3419557	4753815	4043127	4177106	3591444	3703611	3473547	3837944	4491938	4073740	4154417	4237717	3863809	3622521	3226776	3264367	3264104	3429677	3497308	3971019	4084014	3391076	4034052	4576666	4131676
			0.0594	0.059	0.0644	0.0643	0.0582	0.0608	0.0583	0.0569	0.0605	0.0573	0.0576	0.0632	0.0586	0.0569	0.0568	0.0553	0.0583	0.0573	0.058	0.0564	0.0597	0.0594	0.0588	0.0579	0.0577	0.0565	0.0659	0.0581	0.059	0.0588
		Unmapped	1792668	1600600	1385616	1308718	1404384	1730534	1858170	1747095	1668600	1386662	1476036	1214123	1665358	1815131	1648354	1930540	1689855	1640820	1490504	1247565	1392725	1277395	1336243	1498892	1591973	1873697	1154377	1656069	2007994	1830803
			0.0236	0.0241	0.0219	0.0249	0.023	0.0308	0.0228	0.0246	0.0241	0.0221	0.0229	0.0221	0.0254	0.023	0.023	0.0257	0.0233	0.0243	0.0238	0.0218	0.0255	0.0233	0.0229	0.0248	0.0232	0.0259	0.0225	0.0239	0.0259	0.0261
	By pairing types	Paired reads	72972870	63768786	60865480	50376534	58682718	53433204	78423690	68032804	66303806	60267810	61774702	52912580	62636530	75876356	69019286	71785522	69764568	64633386	59951792	55107472	52321172	52795110	56041640	57761274	66034696	68960902	49433128	66654792	74041408	67159850
			0.9604	0.9592	0.9625	0.958	0.9612	0.9499	0.9612	0.9573	0.9596	0.9622	0.9601	0.9632	0.9562	0.9613	0.9618	0.956	0.9603	0.9582	0.9592	0.9629	0.9565	0.9609	0.9606	0.9571	0.9603	0.9544	0.9614	0.9607	0.9551	0.9559
		Fusion paired reads	377580	338228	285244	249212	281126	271258	376656	334272	330964	285266	309704	225542	308648	371806	320666	369324	356066	303778	302344	264434	246990	248510	297946	282246	344778	380916	238884	307050	387892	327870
			0.005	0.0051	0.0045	0.0047	0.0046	0.0048	0.0046	0.0047	0.0048	0.0046	0.0048	0.0041	0.0047	0.0047	0.0045	0.0049	0.0049	0.0045	0.0048	0.0046	0.0045	0.0045	0.0051	0.0047	0.005	0.0053	0.0046	0.0044	0.005	0.0047
		Unpaired Reads	836528	772250	698920	649986	685356	817840	934532	956317	790886	696100	780980	582985	894180	870157	770844	1000630	837563	876824	755644	613945	741787	620099	663973	809224	793371	1039363	593171	763391	1082180	938561
			0.011	0.0116	0.0111	0.0124	0.0112	0.0145	0.0115	0.0135	0.0114	0.0111	0.0121	0.0106	0.0137	0.011	0.0107	0.0133	0.0115	0.013	0.0121	0.0107	0.0136	0.0113	0.0114	0.0134	0.0115	0.0144	0.0115	0.011	0.014	0.0134
	By alignment types	Unspliced	63185539	55346095	52776638	44037870	51193719	46599242	68685044	59441989	57464395	52466304	53805886	45762168	54157158	65816088	59959422	62326868	60374387	56363108	51828272	47868715	45260017	45529527	48202450	50187377	56956183	59713303	42639861	57234823	64300624	58044132
		Spliced	10871538	9415106	8963816	7139236	8345418	7828882	10907303	9758041	9848179	8666896	8941490	7866417	9574596	11163666	10029607	10702139	10457698	9330873	9074789	8011110	7961200	8042061	8703957	8562022	10102681	10540974	7528770	10378915	11076549	10265253
		Fusion	24738	20379	19601	13955	18224	17891	27163	20714	23354	17652	20351	15054	18775	22244	19946	23656	22314	19861	18518	16221	16176	14813	18081	18202	22903	22483	10340	20817	25315	20287
	Splice junctions	Total splice junctions	180633	173922	166445	165722	172645	166445	181578	179073	176274	168793	169328	159244	169158	179892	173636	176818	174119	171311	167730	162041	161989	161328	165355	166983	173827	175361	156913	173633	177669	173836
		Canonical spice junctions	179715	173047	165696	165013	171849	165729	180685	178187	175426	167996	168529	158611	168386	179005	172784	175938	173263	170439	166944	161327	161279	160642	164589	166197	172971	174481	156255	172808	176789	172993
			0.9949	0.995	0.9955	0.9957	0.9954	0.9957	0.9951	0.9951	0.9952	0.9953	0.9953	0.996	0.9954	0.9951	0.9951	0.995	0.9951	0.9949	0.9953	0.9956	0.9956	0.9957	0.9954	0.9953	0.9951	0.995	0.9958	0.9952	0.995	0.9952
		Semi-canonical splice junctions	687	648	566	516	562	539	674	657	638	584	594	472	598	669	645	670	641	624	595	531	553	531	580	592	652	671	484	629	666	651
			0.0038	0.0037	0.0034	0.0031	0.0033	0.0032	0.0037	0.0037	0.0036	0.0035	0.0035	0.003	0.0035	0.0037	0.0037	0.0038	0.0037	0.0036	0.0035	0.0033	0.0034	0.0033	0.0035	0.0035	0.0038	0.0038	0.0031	0.0036	0.0037	0.0037
		Non-canonical splice junctions	231	227	183	193	234	177	219	229	210	213	205	161	174	218	207	210	215	248	191	183	157	155	186	194	204	209	174	196	214	192
			0.0013	0.0013	0.0011	0.0012	0.0014	0.0011	0.0012	0.0013	0.0012	0.0013	0.0012	0.001	0.001	0.0012	0.0012	0.0012	0.0012	0.0014	0.0011	0.0011	0.001	0.001	0.0011	0.0012	0.0012	0.0012	0.0011	0.0011	0.0012	0.0011
	Indels	Small deletions	43817	39742	34286	31134	35863	27694	42257	40434	38195	33963	36938	27125	34113	44229	42424	40048	42223	41285	32972	36175	27528	27842	32857	32784	37926	40899	29440	35766	42114	38768
		Small Insertions	24057	23472	21245	21470	23037	18472	25058	24660	20223	23698	23424	17976	21110	26881	23546	23544	23676	23703	21541	22059	17600	18584	19240	20769	20971	24097	19838	21139	25118	22524
	Fusion junctions	Canonical fusion junction	283	255	214	195	241	206	260	256	250	231	227	174	216	283	236	259	234	255	218	204	202	185	227	195	231	227	169	229	257	237
			0.2888	0.2862	0.3092	0.3115	0.2711	0.3084	0.2364	0.3026	0.287	0.2699	0.2514	0.2964	0.2816	0.254	0.27	0.2651	0.2508	0.2488	0.2608	0.2592	0.2949	0.29	0.2987	0.2566	0.2658	0.2392	0.2949	0.2936	0.257	0.2718
		Semi-canonical fusion junction	127	113	98	90	115	87	151	109	102	97	115	74	114	147	124	127	141	138	125	115	100	103	92	98	115	119	92	101	131	116
			0.1296	0.1268	0.1416	0.1438	0.1294	0.1302	0.1373	0.1288	0.1171	0.1133	0.1274	0.1261	0.1486	0.132	0.1419	0.13	0.1511	0.1346	0.1495	0.1461	0.146	0.1614	0.1211	0.1289	0.1323	0.1254	0.1606	0.1295	0.131	0.133
		Non-canonical fusion junction	570	523	380	341	533	375	689	481	519	528	561	339	437	684	514	591	558	632	493	468	383	350	441	467	523	603	312	450	612	519
			0.5816	0.587	0.5491	0.5447	0.5996	0.5614	0.6264	0.5686	0.5959	0.6168	0.6213	0.5775	0.5698	0.614	0.5881	0.6049	0.5981	0.6166	0.5897	0.5947	0.5591	0.5486	0.5803	0.6145	0.6018	0.6354	0.5445	0.5769	0.612	0.5952
	Filtered fusions	Candidate_fusion	177	155	132	124	145	133	150	145	137	132	129	102	131	151	142	151	141	134	132	111	115	111	130	120	146	142	98	131	161	143
Small RNA-seq		Sample name	X2T0M	X3T0M	X4T0M	X2T1M	X3T1M	X4T1M	X2T2M	X3T2M	X4T2M	X2T3M	X3T3M	X4T3M	X2T4M	X3T4M	X4T4M	X2T5M	X3T5M	X4T5M	X2T6M	X3T6M	X4T6M	X2T8M	X3T8M	X4T8M	X2T12M	X3T12M	X4T12M	X2T24M	X3T24	X4T24M
		Replicate	2	3	4	2	3	4	2	3	4	2	3	4	2	3	4	2	3	4	2	3	4	2	3	4	2	3	4	2	3	4
		Time (hrs post E2)	0	0	0	1	1	1	2	2	2	3	3	3	4	4	4	5	5	5	6	6	6	8	8	8	12	12	12	24	24	24
		Total reads	35947123	33889448	30296361	43013791	18164335	43933589	39090856	23811689	46766341	33666967	24245068	34969675	41679851	2399929	9133122	6347682	17791756	43100617	23019553	45748528	26348112	25695776	53593391	39916873	28921192	32433258	53033173	26233004	40721959	30249892
		Trimmed reads	30311041	27672002	24183250	31856234	14638642	37548673	33375883	19918079	34444232	27523428	20170194	29596402	26733547	1530608	7177932	5376369	14157970	35907719	18645511	27727144	20912475	23164674	45943819	32816168	24750497	27164737	37962604	23458116	34937594	24832064
		% Trimmed reads	0.843212	0.816537	0.798223	0.740605	0.8059	0.854669	0.853803	0.836483	0.736518	0.81752	0.83193	0.846345	0.641402	0.637772	0.785923	0.846981	0.79576	0.833114	0.809986	0.606077	0.793699	0.901497	0.857267	0.822113	0.855791	0.837558	0.715828	0.894221	0.857955	0.820898
		Short reads	3786928	4837558	4634193	10114808	3186213	4064352	3690538	1413757	11163293	4680673	2184525	2193136	13692397	276651	1407649	611184	3038503	5944503	3557977	16685669	4274181	1658771	5529290	5824896	3334318	2853578	12640861	1683560	2432910	3079089
		% Short	0.105347	0.142745	0.152962	0.235153	0.17541	0.0925113	0.0944092	0.0593724	0.238704	0.139029	0.0901018	0.0627154	0.328514	0.115275	0.154126	0.0962846	0.170782	0.137922	0.154563	0.364726	0.16222	0.0645542	0.103171	0.145926	0.11529	0.0879831	0.238358	0.0641772	0.0597444	0.101788
		Exact match to genome	23014090	21983381	17810787	23827603	11287426	28972736	24931443	15294119	25617075	19883558	15649608	22218047	19259663	1189379	5462006	3971148	11069111	27789915	13516330	20762073	15552272	17827654	36064344	24185885	19211771	21131783	28529684	18207838	26924505	18632161
		% exactly mapped	0.759264	0.794427	0.736493	0.747973	0.771071	0.771605	0.74699	0.767851	0.743726	0.722423	0.775878	0.750701	0.720431	0.777063	0.760944	0.73863	0.781829	0.773926	0.724911	0.7488	0.743684	0.769605	0.784966	0.737011	0.776218	0.777912	0.751521	0.776185	0.770646	0.750327
		No exact match to genome	7296951	5688621	6372463	8028631	3351216	8575937	8444440	4623960	8827157	7639870	4520586	7378355	7473884	341229	1715926	1405221	3088859	8117804	5129181	6965071	5360203	5337020	9879475	8630283	5538726	6032954	9432920	5250278	8013089	6199903
		% not exactly mapped	0.240736	0.205573	0.263507	0.252027	0.228929	0.228395	0.25301	0.232149	0.256274	0.277577	0.224122	0.249299	0.279569	0.222937	0.239056	0.26137	0.218171	0.226074	0.275089	0.2512	0.256316	0.230395	0.215034	0.262989	0.223782	0.222088	0.248479	0.223815	0.229354	0.249673
		Total mapped reads	2.74048e+07	2.58914e+07	2.13224e+07	2.82907e+07	1.32727e+07	3.3896e+07	2.98212e+07	1.79849e+07	2.98862e+07	2.34317e+07	1.8031e+07	2.67839e+07	2.27751e+07	1.28043e+06	6.53695e+06	4.75855e+06	1.31197e+07	3.22779e+07	1.61625e+07	2.41444e+07	1.89083e+07	2.07086e+07	4.18551e+07	2.87048e+07	2.2624e+07	2.50561e+07	3.40678e+07	2.15718e+07	3.10149e+07	2.11123e+07
		% mapped (total)	0.904121	0.935653	0.881702	0.888073	0.906692	0.902722	0.893495	0.902942	0.867669	0.851336	0.893941	0.90497	0.85193	0.836549	0.910701	0.885086	0.926662	0.898912	0.866829	0.870786	0.904162	0.893975	0.911006	0.874714	0.914082	0.922375	0.897403	0.91959	0.887724	0.850202
		Total mapped to miRs	2.02921e+07	1.98291e+07	1.53337e+07	2.0832e+07	9.97866e+06	2.43785e+07	2.12971e+07	1.31684e+07	2.31911e+07	1.58161e+07	1.39452e+07	1.79147e+07	1.61839e+07	1.04055e+06	4.90688e+06	3.42053e+06	9.78002e+06	2.31863e+07	1.17355e+07	1.70923e+07	1.30977e+07	1.57727e+07	2.9976e+07	1.80913e+07	1.65566e+07	1.81803e+07	2.43319e+07	1.6006e+07	1.96431e+07	1.51253e+07
		% of total mapped to miRs	0.740456	0.765856	0.719134	0.736355	0.751817	0.719214	0.71416	0.732194	0.775979	0.674987	0.773402	0.668863	0.710598	0.812656	0.750638	0.718818	0.745448	0.718336	0.726094	0.707921	0.692696	0.76165	0.716185	0.630256	0.731818	0.725586	0.714221	0.741985	0.633344	0.716421
		Total mapped to tRNAs	1.40643e+06	1.10627e+06	1.0487e+06	1.49224e+06	555456	1.79063e+06	1.74167e+06	1.07722e+06	1.36888e+06	1.36518e+06	866627	1.14908e+06	1.13441e+06	54676.7	238551	178144	512356	1.60189e+06	727455	1.22723e+06	783931	911702	2.19948e+06	1.2921e+06	992221	1.10071e+06	1.57593e+06	886329	1.968e+06	1.11821e+06
		% of total mapped to tRNAs	0.0513203	0.0427272	0.0491828	0.0527466	0.0418494	0.052827	0.0584039	0.0598959	0.0458032	0.058262	0.0480633	0.0429019	0.0498094	0.0427019	0.0364927	0.0374365	0.0390526	0.0496281	0.0450089	0.0508286	0.0414597	0.0440252	0.0525499	0.0450134	0.043857	0.0439298	0.0462587	0.0410873	0.0634532	0.0529649

## Sheet: Table S2
Gene Name	Cluster	0	1	3	4	5	6	8	12	24
SLC7A5	Transient	51103	116103	283166	319582	343004	310224	249803	193999	160656
HSPA8	Transient	64177.2	59298.4	71956.2	98997.1	119845	124409	137603	137546	119811
SLC9A3R1	Transient	28655.7	42425.4	71733	84225.3	91109.6	90864.4	85028.4	77785.4	69400.3
XBP1	Transient	18612.5	53955.2	82578.2	90405.2	79303.2	70093.5	73028.6	68750.7	72117.5
STC2	Transient	26489.9	58143.9	87812.5	89127.5	77424.2	68795.1	62818.7	58121.6	52784.8
CA12	Transient	18000.3	30837	77395.4	96057.8	79830	61352.9	47103.4	43637	46905.2
TGM2	Transient	579.432	8141	68871.8	91762.6	93098	90754.6	76313	46604.5	12413.7
RET	Transient	6090.86	11897.3	55676.9	77191	74935.9	63748.2	55369.1	50959.6	43584.9
CCND1	Transient	19828.2	50510.1	69964.9	61675.1	52560.6	47447.7	43783	42446.5	40399.9
PREX1	Transient	23253.3	26011.4	34752.9	45073.8	51846.7	46487.6	39975.9	36325.3	31335.7
PGLYRP2	Transient	529.096	8185.04	39451.7	51402.6	49844.7	53829.4	48332	44601.6	27361.2
SLC3A2	Transient	13043	12775.7	21410.4	34983.1	45078.1	52695.9	55429.7	45874.6	31885.2
HSPA5	Transient	22503	22228	24600.2	31742.9	41266.1	45297.1	45702.4	38417.9	29744.7
HSPB8	Transient	6724.81	20040.8	39501.1	49644.8	42792.5	37707.3	29524.7	25019.6	21855.6
THBS1	Transient	10019	27182	31094.8	31570.5	32870.5	34916.8	34325	32968	29342.3
COL18A1	Transient	13484.7	14239.8	26485.4	29956.2	35876.1	40243.1	37155.1	36457	27095.5
PARD6B	Transient	13218.1	22641	25862	33346.7	33454.3	31494.2	30359.7	28355.1	28101.9
PTGES	Transient	1128.57	5904.34	39827.8	53253.5	46529	38396.3	25467.1	13322	8572.63
EGR3	Transient	874.642	27603.6	25329.4	32714.5	36394.7	30417.5	26841.8	21609.7	26620.7
TPM1	Transient	8072.14	10694.5	23153.7	32607.6	34925.4	33335.1	34346.7	27850.6	22054.5
CALM1	Transient	15924	23556.5	32516.9	34638.3	29289.8	26249.1	23091.4	20224.2	19532.2
WWC1	Transient	7074.88	7493.32	28728.5	43399.4	37295.3	27434.7	19689.4	16746.6	15150.7
SIAH2	Transient	5380.18	17246.3	31272.4	26437.1	18068.6	15734.3	15783.3	18089.7	19492.3
ITPK1	Transient	11421.2	12229.9	21526.9	23583.7	21542.3	19302.7	18165	18828.3	18143.6
FAM102A	Transient	6428.49	11768.8	33104.3	30169.9	20819	16080.7	13133.4	12204.9	11145.5
OLFM1	Transient	4889.68	7845.37	16021.9	20022.1	20942.7	20081.3	18658	17154.9	15627.4
TFRC	Transient	8964.78	12901.8	18143.4	20101.6	19300.1	18737.1	16232.6	12370.9	13121.6
NRIP1	Transient	5593.41	14474.8	19043.2	16603.2	17389.7	17405	17753.2	15596.2	15875.3
JAK1	Transient	7651.85	8445.54	13515.7	17580.3	20073	18643.2	18205.4	15698	15791.9
NCOR2	Transient	8588.62	8894.22	25559.7	20809.7	18913.9	14572.1	10842.3	10120.5	10012.5
ANXA9	Transient	5060.21	7637.33	14333.1	16483.1	16708.5	16128.3	16255.1	16459	14954.1
KCNK5	Transient	2131.07	25387.6	27365.7	17743	11556.6	9318.39	8898.09	9781.56	9595.22
B4GALT1	Transient	4429.61	8047.76	19958.9	22311.1	18524.1	15496.9	12182.5	10251.1	9665.34
SLC7A1	Transient	8058.18	8307.76	12950.8	14478.8	16170.7	16488.1	15244.1	14143.4	12413.9
ABAT	Transient	6395.06	7554.68	12772.7	16094.1	16988	16770.2	15739.4	13398.3	11126
CYP1B1	Transient	1990.35	15217.2	27257.4	22044.9	14575	11540.2	9118.78	7747.35	6373.82
ABCA3	Transient	7563.37	7603.85	15154.1	16326.8	16745.3	16298.3	13952.5	12441.9	9532.87
ELF1	Transient	5359.73	5740.72	14892.7	17534	16833.3	14510.2	13596	12573.4	11984
MARCKSL1	Transient	7123.22	10149.2	13341.6	14452.1	14565.9	15083.4	14124.5	12872.2	10400.6
AKAP1	Transient	6825.15	10030.6	19759.5	19693	14116.1	11022.8	9229.4	7927.65	7879.03
AP1B1	Transient	6810.81	7447.1	12827.4	13496.2	13808.7	13662.2	13152	12734.2	11339.7
TOB1	Transient	8267.29	28036.4	18743.3	11167.4	8014.62	7181.88	7641.27	8304.92	7214.29
TSPYL5	Transient	6562.87	13170.3	20330	16448.1	11233	9939.51	8864.55	8652.13	9136.62
ECE1	Transient	6505.99	7146.67	14224.7	16530.1	15766.9	13262.3	10730.9	9386.96	8561.57
C10orf18	Transient	5808.76	6589.34	14016	17298.9	15754.6	12507.8	10684.2	8693.84	8545.77
TBX2	Transient	7764.34	19939.8	16761.4	11562.3	9880.76	8764.4	8255.98	8471.84	8249.86
LDLR	Transient	5370.34	5231.51	10004.8	12039.1	13708.7	13352.3	12697.1	13320.9	10931
SLC6A6	Transient	5745.71	7667.9	16441.5	14548.8	13037.4	10799.6	9368.39	9292.83	8873
HIF1A	Transient	6005.84	7170.71	8510.63	10613.8	13740.5	14405.1	12934.6	10461.4	10041
ABHD2	Transient	5531.97	5572.85	7754.15	10263.9	13653.1	14424.9	13942.2	12111.9	10518
KCNK6	Transient	2266.62	10055.1	25186.8	15314.1	10337.3	8469.38	6785.15	6808.43	7011.66
DDX21	Transient	6399.16	7247.48	11294.5	13367.3	12487.2	11528.7	10793.6	8958.56	8534.53
GRHL2	Transient	5749.75	5085.2	14268.3	14230.3	12139.5	10215.5	9762.57	8985.34	9217.31
SYT12	Transient	4124.97	4743.02	14311.1	17942	14649.5	12073.7	8644.69	6438.45	4990.85
SH3BP5	Transient	4810.19	7771.58	13526	14510.2	11859.8	9846.73	8499.28	7839.55	8361.2
FOSL2	Transient	3680.13	12166.6	20611.8	11888.1	8496.77	7384.75	6886.35	7236.25	6327.94
MANEAL	Transient	3031.28	5688.64	14876.3	15964	12597.3	10227.5	8019.93	7138.53	6728.01
NBPF1	Transient	3792.93	6538.16	12771.2	13103.9	12610.1	9886.74	8722.31	7534.85	7597.99
P2RY2	Transient	2435.69	11494.6	26687.6	17020.2	9624.23	5361.84	3425.2	2815.33	3039.2
MAPKAPK2	Transient	5322.8	7122.62	10394.4	11566.2	10626	9745.69	9041.66	8794.81	8657.28
TARS	Transient	5559.76	5591.09	8131.72	11558.2	11544.3	10315.8	9872.04	8842.38	8199.25
VASN	Transient	1655.03	33809.4	22705.4	6248.25	3644.97	2939.6	2301.61	2851.61	2586.48
ADCY9	Transient	4429.08	4561.42	13256.2	11890.6	10876	9593.05	8194.31	8261.17	7324.84
GGA2	Transient	5206.89	5998.79	8321.73	9933.81	10790.7	9625.87	9390.91	8698.79	8985.02
SLC2A1	Transient	4655.72	8612.55	13533.4	11046.8	8274.68	7732.08	7818.47	8091.25	7076.85
CYP1A1	Transient	1059.92	7448.58	23258.3	22300.7	11233.3	5728.17	2994.01	1256.98	409.459
CSK	Transient	4971.57	6478.18	10487	11177.4	10574.7	9249.52	7932.28	7136.67	6774.25
TSKU	Transient	3210.23	11439.6	17100.3	10908.4	7435	7219.42	6696.23	5879.83	4875.96
RARA	Transient	3740.47	10889	14058.4	9564.74	8428.03	8246.29	7010.96	6663.99	6153.98
TFAP2C	Transient	4119.4	10887.9	10791.4	9825.53	7763.89	6714.41	7066.3	7443.27	7131.96
ZNF185	Transient	3017.36	3312.3	7912.82	10084	10965.9	11291.8	10545.4	8683.69	5586.12
MARS	Transient	4695.34	4698.44	6866.2	8508.29	9415.43	9482.69	9921.39	9539.02	7421.83
CXXC5	Transient	3326.76	6916.31	14504.3	9809.46	7910.4	7255.34	6908.19	7141.79	6767.66
EZR	Transient	6021.01	7226.37	10787.9	12232.1	9791.16	7367.44	6072.65	5551.32	5282.26
C14orf43	Transient	5624.9	12906.6	12469.8	8154.47	6544.92	5444.73	4715.58	4997.57	5118.65
HIPK2	Transient	4285.03	4364.16	6786.46	8534.65	10522.3	9430.65	7531.41	6243.61	4936.93
SEMA3G	Transient	314.377	9460.06	16641.6	12483.4	7618.86	4958.25	3255.14	3845.37	3877.58
MREG	Transient	3237.55	5187.46	6957.89	8372.18	7762.84	7784.76	7845.02	7302.36	7027.45
RHOD	Transient	2555.33	3619.88	6632.66	8329.66	8623.12	8754.65	8749.4	7259.35	6088.75
ULK1	Transient	4537.75	5076.16	9130.45	7532.97	7210.66	7021.94	6762.86	7229.1	5960.14
SSR3	Transient	4199.36	4499.34	5598.25	7187.68	7654.03	8460.67	8208.89	7217.68	6773.23
TIPARP	Transient	1870.88	10792.9	10326.7	7360.66	6172.22	5629.87	5555.32	5465.95	5780.06
LONRF2	Transient	3016.62	5974.02	10160.2	8182.57	7159.38	6484.08	5715.47	6047.87	5962.98
YARS	Transient	3935.7	3932.58	5158.14	6833.8	7607.02	7806.78	8305.26	7989.1	6380.05
PPIF	Transient	3666.54	5311.43	7808.89	8429.07	7241.94	6421.32	6038.99	6026.84	6656.7
CCDC88C	Transient	3615.69	3701.81	15227.4	11223.8	7117.56	5124.15	4028.32	3905.25	3270.67
JARID2	Transient	3199.71	3396.73	7430.37	11546.7	9146.83	6517.15	5469.25	5110.46	4723.38
SLC19A2	Transient	3103.68	4249.7	3839.43	7157.64	7836.9	8407.31	8218.18	7082.73	6233.44
WFS1	Transient	2717.82	4206.32	8733.2	8253.21	7592.49	6664.33	5426.61	5471.79	6046.64
SLC22A5	Transient	2010.8	4014.47	8619.61	10387	8297.43	6691.04	5589.94	4727.26	4453.03
FHL2	Transient	664.644	3029.37	9172.01	11032.2	8417.89	6597.38	5821.39	4652.41	4379.75
UNC119	Transient	1638.1	3549	7164.96	9276.16	9205.22	8039.52	6703.07	4226.6	3954.73
SLC25A24	Transient	3347.63	3944.39	6965.83	9119.74	7868.44	6652.76	5789.09	4650.27	4712.88
ARMCX3	Transient	2425.73	3328.89	6636.56	8907.37	8158.86	7068.97	5650.46	4274.2	4902.46
AMZ1	Transient	642.469	1971.02	8901.64	8867.06	8146.91	6964.98	5601.69	4805.63	4589.5
TMEM120B	Transient	2061.67	2563.82	5423.6	7847.11	8095.14	7160.31	6182.16	5583.11	5405.25
AMD1	Transient	2823.37	3276.24	5637.49	7192.57	7187.19	6999.63	6360.07	4876.56	5142.49
PRICKLE2	Transient	3431.02	6969.68	5942.38	5826.16	5775.25	5287.99	5156.69	5097.67	4975.69
PLEKHH1	Transient	3118.4	3828.01	5817.65	6103.18	6925.28	6246.16	5509.87	5198.33	4803.88
CHPF	Transient	3270.66	3673.37	5629.02	5545.43	5999.88	6669.21	5943.01	5558.16	4126.53
NAB2	Transient	2118.53	6963.13	4359.08	4178.21	5039.73	5376.31	5602.02	6043.2	6120.12
ATP11A	Transient	2881.43	3378.24	5783.02	7039.13	7692.86	6329.3	4606.9	3698.49	3577.38
KLF10	Transient	2589.69	12149.3	4089.5	4307.93	4670.22	4141.04	4244.33	4268.12	4411.48
TUBA3D	Transient	222.085	1717.98	7554.82	10436.3	8107.51	7059.78	4903.72	2826.12	2028.17
NOL6	Transient	2473.04	3379.74	6214.88	6371.38	6239.19	5560.64	4989.79	4116.54	3537.17
NKAIN1	Transient	1036.73	1274.2	3406.33	5218.86	6252.61	6634.03	6534.42	6950.19	5215.54
TGIF2	Transient	2877.78	3842.89	6062.27	5476.72	4694.09	4488.67	4644.18	4846.71	4724.95
USP31	Transient	1746.34	2416.32	10314.8	7781.23	5150.69	4145.91	3527.75	3306.24	3080.94
VCL	Transient	2723.02	3497.13	6598.6	6540.9	5505.4	4814.5	4338.66	3605.11	3454.69
PLIN4	Transient	597.481	2861.82	9366.4	7527.44	6730.6	4645.49	3712.63	3346.58	2041.47
DEGS2	Transient	2584.03	2801.45	5037.08	5056.97	5354.84	5848.45	5366.76	4838.57	3890.59
ZFP36L1	Transient	3195.78	7046.32	5178.43	4435.47	4595.02	4416	3938.87	3883.65	3836.55
TMEM229B	Transient	1810.21	2660.81	5831.85	6427.06	5469.8	4724.4	4429.81	4303.95	4698.39
CCDC85C	Transient	3680.49	4091.84	7758.19	6468.17	4500.51	3835.67	3456.46	3142.52	2890.54
PLCD3	Transient	2004.54	3605.31	7045.43	6585.56	5603.09	4903.74	3957.52	3200.44	2728.5
ISYNA1	Transient	2486.81	3634.75	5882.06	5200.05	4703.99	4943.03	4519.84	4574.67	3630.07
PPRC1	Transient	2621.78	2919.28	6157.96	4694.56	4956	4650.77	4422.45	4365.95	4145.93
SOS1	Transient	2980.83	2831.97	6144.47	6300.33	4703.57	4067.58	3867.76	4017.59	3767.1
ARMCX6	Transient	1929.56	3312.09	6229.94	6824.59	4999.25	3843.65	3579.82	3659.17	4296.79
AEN	Transient	2244.2	3029.14	5441.29	5233.83	5117.38	4662.64	4451.2	4144.91	3910.08
PAK4	Transient	2867.53	3252.88	6271.77	5968.94	5222.07	4462.22	3541.71	3312.05	3184.86
CHSY1	Transient	2323.21	4421.93	6918.56	4824.76	4051.59	3803.43	3615.54	3823.52	4021.38
VWF	Transient	189.533	198.337	6629.57	9802.88	9511.48	6684.49	3248.13	747.98	389.145
TTC7A	Transient	1790.95	1701.31	6211.18	7144.07	5734.78	4380.74	3657.35	3282.03	3494.47
CABLES2	Transient	2404.99	3187.58	7020.15	6486.47	4763.25	3676.27	3014.7	2705.13	3431.85
FOXC1	Transient	613.505	9708.9	7049.77	4734.14	3411.61	2832.2	2836.77	2684.28	2801.95
HS6ST1	Transient	2968.76	4087.7	6862.78	4740.47	3561.9	3316.08	3189.27	3799.21	4092.33
BLVRB	Transient	1939.13	2103.02	3975.67	4737.25	4635.77	4772.2	4847.35	4952.47	3769.15
TUBA3E	Transient	135.473	1916.26	6952.57	7933.24	6686.11	5317.21	3271.88	2222.22	1220.87
STK24	Transient	2533.25	2725.08	4403.75	5250.99	4875.97	4487.85	4120.57	3661.17	3577.24
SMOX	Transient	843.693	3659.34	9345.26	7801.88	4715.08	2941.75	2152.64	1690.71	1759.31
SMTNL2	Transient	398.939	2817.83	10138.9	7454.13	4022.82	2756.03	2311.31	2252.59	2646.51
ASB13	Transient	1576.9	3001.8	6917.55	6372.93	4476.26	3702.89	3152.81	2853.44	2735.28
LMX1B	Transient	2564.89	3263.92	5298.12	4182.29	4240.88	4013.62	3726.4	3783.1	3686.04
B3GALNT1	Transient	2239.91	3019.44	4103.41	4955.68	4372.21	4142.83	4053.42	3785.33	3897.13
DGKZ	Transient	2186.45	2844.95	5068.71	4680.12	4579.79	4403.65	3961.23	3570.88	3032.82
TBKBP1	Transient	957.735	2852.66	10259	7590.05	4558.01	2954.22	2120.65	1630.37	1299.21
CBFA2T3	Transient	2132.54	2532.47	7765.2	6042.65	4109.99	3199.53	2876.87	2725.4	2603.61
SLC25A25	Transient	1419.68	6084.83	6334.59	4401.35	3641.3	3275.96	3037.14	2891.51	2574.37
CHST8	Transient	334.073	344.88	3529.61	7502.72	6785.88	5815.93	3739.7	2880.73	2148.64
GPC1	Transient	2117.1	2572.01	5400.88	4805.9	4388.33	4269.55	3536.65	3080.36	2782.27
GAB2	Transient	1215.8	1318.39	6064.72	7513.53	4936.64	3436.63	2789.74	2631.62	2698.86
SLK	Transient	2087.63	2681.67	6143.46	6344.39	4603	3360.8	2647.43	2314.77	2315.88
C2orf18	Transient	2039.02	3450.65	5287.6	4926.59	4055.53	3627.67	3185.43	3066.82	2725.09
OSTF1	Transient	1479.34	2013.24	3425.24	4850.11	4645.13	4402.59	4175.24	3620.24	3523.04
SLC47A1	Transient	381.588	487.339	2779.25	4925.12	5604.14	5553.28	5203.93	4301.34	2411.95
VEGFA	Transient	1829.84	4475.49	4772.3	4033.98	3575.3	3231.02	3257.86	3149.91	2510.53
RASGRP1	Transient	383.465	944.679	6678.51	6152.43	3866.26	3278.56	3238.18	3044.52	2758.5
SIN3B	Transient	2219.66	2448.1	4316.59	4478.26	4196.98	3519.75	3177.81	3061.9	2878.22
HPDL	Transient	1458.84	3215.57	4948.28	4577.62	3626.95	3428.03	3271.82	2990.38	2755.12
RBM24	Transient	601.797	2407.35	5042.98	4992.48	4150.24	3598.1	3417.41	2978.29	3000.24
MAX	Transient	2035.96	2663.29	5030.47	5191.47	3603.58	3080.96	2866.36	2593	2422.98
ARHGEF10L	Transient	2084.71	2164.25	5569.98	5181.59	3897.84	3166.32	2727.46	2559.21	2135.8
OTOF	Transient	106.758	282.696	3407.22	5407.29	5038.37	4499.97	4206.82	3394.13	3109.32
FGFRL1	Transient	1991.66	2754.9	5057.62	3952.12	3478.75	3218.69	2711.69	3017.58	3217.19
DOPEY2	Transient	2212.25	2231.91	5287.82	5266.03	4679.55	3331.09	2518.27	1778.63	1824.47
BCR	Transient	2228.12	2193.78	5425.31	4820.49	3694.92	2999.6	2634.81	2660.5	2422.67
ENDOD1	Transient	1410.13	1986.32	2994.62	3925.15	4173.96	4030.15	3666.6	3212.32	3514.79
PFKFB3	Transient	1530.48	6613.24	5733.12	3209.22	2696.64	2474.14	2275.72	2100.48	2118.91
RAB37	Transient	799.367	3906.69	6148.96	5105.05	3408.29	3160.92	2443.66	2101.69	1536.38
UGCG	Transient	1811.97	3020.74	2987.77	3525.59	3652.12	3494.32	3445.26	3236.9	3217.94
EHD1	Transient	1937.11	4125.3	4682.82	3656.26	3122.95	2924.38	2474.26	2520.8	2714.5
AXIN1	Transient	2134.36	2511.82	5083.54	3813.62	3119.52	2850.04	2702.1	2737.48	2582.27
PMM2	Transient	1972.23	2166.81	3337.57	3971.08	3690.93	3368.55	3235.47	2866.09	2649.06
MICB	Transient	1187.63	4280.8	4085.28	3405.78	2769.3	2478.72	2566.69	3049.94	3432.06
SGEF	Transient	1467.57	1626.69	4171.83	4832.09	3953.43	3307.83	2714.09	2550.04	2415
TMED8	Transient	1481.99	1846.45	3324.83	4074.76	3637.76	3190.92	2857.44	3108.6	3324.54
TCIRG1	Transient	1426.31	1647.98	2864.88	3102.24	3453.08	3642.4	3584.39	3550.75	3225.45
ST3GAL1	Transient	2488.21	2610.42	3569.3	3938.08	4032.7	3522.81	2584.93	1817.94	1453.96
TGFA	Transient	871.476	1517.71	4520.4	4342.04	3457.51	3153.72	2889.39	2614.33	2509.62
FMN1	Transient	572.167	997.449	2285.38	4770.91	5104.23	3632.23	2906.46	2703.62	2571.98
SBNO2	Transient	1974.94	2234.83	4933.67	3413.66	2970.48	2721.51	2433.16	2470.87	2115.35
C9orf95	Transient	695.114	1371.6	2840.54	3851.69	3904.19	3569.05	3143.23	2967.82	2897.41
PPP2R2C	Transient	1763.77	1652.62	2298.13	3307.67	3682.83	3563.04	3206.66	2870.75	2849.4
SYNJ2	Transient	2086.62	1951.35	4635.05	3375.66	2962.68	2620.55	2479.17	2400.32	2429.8
IL17RB	Transient	794.936	1499.25	3136.32	3904.34	3603.75	3050.65	2727.05	2656.37	3544.05
MGC16121	Transient	373.803	2410.19	2960.79	3568.4	3523.22	3236.54	2998.53	2740.56	3053.52
TMEM104	Transient	1133.96	1172.07	3633.34	4108.73	3802.58	3331.57	2770.7	2467.68	2158.66
SFXN5	Transient	1676.21	1879.52	3387.94	4273.29	3676.46	3090.03	2376.6	2030.22	2111.09
KAZ	Transient	1100.98	1055.29	6325.02	5747.57	3009.02	2052.5	1721.12	1685.32	1696.12
GADD45B	Transient	1265.1	5359.23	3508.22	2601.98	2332.89	2270.15	2290.07	2339.26	2117.43
KLHL21	Transient	1696.72	3338	3502.39	2820.33	2656.6	2620.28	2426.88	2394.22	2285.65
SCNN1G	Transient	482.816	3619.67	6688.2	4262.02	2457.26	1667.98	1496.11	1318.27	1653.76
PITPNM2	Transient	874.652	954.89	4374.05	6008.74	4454.22	2618.55	1636.07	1345.51	1161.58
GPRIN1	Transient	1134.4	1674.73	2933.1	3198.52	3006.01	2889.73	2718.57	2794.71	3045.25
RCL1	Transient	1438.77	1866.61	3640.87	3520.68	2887.53	2533.25	2348.29	2389.48	2554.95
RHOBTB1	Transient	708.974	924.006	2763.61	3539.46	3405.26	3467.61	3283.33	2975.93	2102.1
PKDCC	Transient	188.116	1666.3	5891.46	5219.4	2657.94	1982.78	1843.99	2014.1	1611.75
FOXK1	Transient	2251.83	2883.12	5557.04	2532.58	2152.09	2097.8	1824.54	1964.96	1694.21
LAMA3	Transient	908.013	902.019	1133.69	3832.37	4793.52	3749.67	2910.26	2466.97	2215.51
DDHD1	Transient	1701.42	1565.23	2842.57	3528.51	3254	2681.52	2424.96	2320.69	2464.49
SULT2B1	Transient	1360.22	1570.34	3065.16	3428.67	3479.21	3047.39	2646.34	2125.44	1988.77
ABTB2	Transient	1227.24	1237.14	5145.83	3706.46	2827.79	2279.1	1952.47	1946.62	2199.57
FOS	Transient	926.598	4507.64	4255.91	3288.06	2132.04	1859.57	1758.73	1869.59	1813.94
TANC1	Transient	1568.66	1762.45	2275.85	3606.42	3208.11	2677.46	2323.88	2325.5	2313.13
PLIN5	Transient	647.373	1364.3	2715.5	3024.23	3230.28	3340.95	2955.57	2456.32	2017.56
C10orf2	Transient	1630.05	2111.91	3514.88	2850.01	2603.11	2529.87	2375.04	2143.55	1986.91
LOC100271836	Transient	1165.32	2556.56	3036.2	3156.52	2587.91	2056.01	2743.03	2015.77	2213.58
CASZ1	Transient	2041.82	2538.06	4442.67	2634.71	2190.09	1961.34	1886.11	1993.51	1835.45
CHD9	Transient	1563.4	1695.93	3619.48	3284.09	2812.92	2504.94	2223.58	1833.46	1886.17
RAB11FIP1	Transient	1585.53	2367.87	3342.54	3310.69	2817.48	2185.74	1818.49	1704.28	1852.58
KBTBD6	Transient	1293.29	2465.72	3601.86	3008.56	2675.14	2293.13	2110.62	1846.69	1659.23
RPP25	Transient	1269.33	1976.21	2788.07	2799.7	2581.99	2487.71	2383.47	2254.76	2400.24
C8orf46	Transient	242.608	2255.87	2374.84	2522.79	2461.36	2412.56	2715.63	2828.05	3064.42
CCDC86	Transient	1383.7	1573.7	2520.39	2876.16	2860.05	2758.07	2599.2	2290.79	1827.13
KIAA0040	Transient	1294.46	1816.12	2323.34	2570.85	2896.94	2654.05	2457.63	2241.88	2405.78
CACNA1I	Transient	135.78	662.473	4583.92	4478.12	3743.93	2791.37	1571.65	1054.48	929.588
SGK223	Transient	766.151	1829.33	2848.29	2549	2599.36	2500.07	2237.95	2304.45	2140.79
HCK	Transient	109.613	294.307	2491.62	3196.09	3110.09	3332.23	2652.05	2319.23	2235.91
CEBPB	Transient	1316.47	3316.85	3050.57	2225.55	1994.89	2001.74	1950.52	1871.43	1767.99
GATSL3	Transient	546.424	2431.55	3572.8	3477.18	3004.42	2232.25	1599.52	1166.74	1095.3
FRMD8	Transient	1123.03	1731.6	3819.71	3197.93	2238.44	1912.29	1698.67	1655.91	1675.93
SNX24	Transient	614.534	740.923	1549.99	3361.12	3455.2	2979.76	2405.8	1927.95	2011.06
AFF1	Transient	1291.62	1415.49	3277.15	3837.83	2494.93	1760.12	1644.96	1541.58	1676.08
RIMS4	Transient	1002.22	1335.63	2541.77	2669.96	2357.86	2135.62	2081.63	2258.33	2218.35
NHSL1	Transient	884.411	882.857	3289.5	2736.91	2365.03	1903.55	2013.2	2186.67	2300.26
DDX10	Transient	964.395	941.505	1241.1	3340.99	3219.29	2561.2	2279.68	2081.07	1910.74
NOP16	Transient	1296.78	1607.01	2381.1	2642.52	2367.56	2214.95	2179.28	1961.77	1827.5
KDM4B	Transient	1226.14	1168.2	2865.47	3701.54	2725.04	1984.51	1634.33	1603.03	1543.39
KIAA0232	Transient	1618.27	1809.42	3548.17	2499.95	2108.34	1780.92	1662.92	1593.56	1798.83
PADI3	Transient	115.867	302.728	2189.68	3105.2	3368.81	3655.42	2809.14	1916.41	932.515
LFNG	Transient	1158.02	2893.24	3128.29	2032.96	1776.8	1871.64	1916.14	1854.44	1598.01
KCTD5	Transient	1596.95	2556.16	3296.26	2454.44	2009.84	1758.34	1542.3	1502.88	1477.5
DPM2	Transient	1271.32	1913.23	2918.22	2388.85	2146.99	1902.71	1849.84	1875.95	1916
FAM63A	Transient	1390.65	2335.18	3291.27	2764.84	2168.87	1519.61	1294.28	1391.91	1469.96
OTUD6B	Transient	1202.32	1302.99	1608.64	2181.25	2439.57	2430.66	2458.01	1894.6	1954.44
RUSC2	Transient	1064.59	2098.68	3519.12	2243.71	1665.69	1395.07	1491.97	1986.53	1998.36
ORAI2	Transient	1081.65	1334.71	2485.39	2535.76	2430.18	2305.83	1976.73	1721.03	1558.84
URB2	Transient	1107.68	1072.44	2640.83	2367.25	2302.51	2199.07	1987.31	1850.06	1851.2
AMMECR1	Transient	1180.79	1235.09	2978.18	3285.78	2329.65	1843.05	1507.72	1272.38	1351.04
MICAL2	Transient	803.475	876.026	1843.26	2223.7	2711.6	2557.78	2415.6	1986.46	1507.17
CHPT1	Transient	1164.07	1423.06	1798.72	2381.53	2023.02	2322	2124.19	1721.64	1928.47
ZSWIM6	Transient	891.451	1011.92	3485.92	2693.85	2192.98	1796.81	1707.88	1567.44	1534.73
SLC26A2	Transient	895.306	1315.56	1941.44	2508.42	2348.3	2126.84	1885.42	1683.09	1908.93
ONECUT2	Transient	584.174	1921.59	3820.54	2760.37	1943.6	1635.15	1467.56	1343.85	1074.53
ACSS1	Transient	1591.31	1967.12	2948.17	2835.26	2335.91	1803.47	1287.35	881.464	712.136
NEDD9	Transient	910.562	3153.42	1694.77	2500.35	2327.7	1949.47	1493.88	1204.68	1077.31
ADRA2A	Transient	246.054	1288.17	2934.96	2625.32	2127.09	1896.17	1689.35	1740.75	1764.04
E2F6	Transient	990.185	1748.22	2230.05	2245.59	2005.47	1905.61	1805.22	1574.76	1699.98
ICOSLG	Transient	928.586	2127.58	4560.04	2318.39	1583.26	1261.62	1149.26	1089.02	1161.41
SERPINB9	Transient	149.449	3223.24	5920.94	3455.28	1379.71	625.12	329.79	343.982	416.409
SMAD7	Transient	930.3	4041.04	3040.19	1745.65	1276.48	1197.2	1108.3	1161.56	1020.03
ALS2CL	Transient	919.3	1314.42	2240.96	2511.62	2628.27	2262.54	1618.74	1218.2	804.85
PEX11A	Transient	872.63	1443.77	2343.55	2735.11	2178.42	1650.91	1409.39	1448.69	1379.48
ETS2	Transient	1145.65	2130.74	2763.28	1943.29	1702.93	1576.32	1466.88	1341.31	1348.97
MAP6D1	Transient	536.81	1528.08	3696.76	3036.98	1825.35	1341.32	1137.92	1101.89	1057.12
SEC14L2	Transient	217.669	1045.6	3072.15	3266.61	2556.38	1902.97	1240.19	985.253	904.955
PNO1	Transient	1023.46	1194.03	1833.56	2042.88	2114.95	1916.11	1832.92	1586.58	1506.4
LRRFIP2	Transient	1076.85	1025.39	1071.69	1768.51	2205.44	2118.7	2080.12	1929.2	1769.71
PLXNA4	Transient	1209.87	1291.86	1334.38	1407.02	2286.3	2482.76	1999.71	1531.41	1459.18
PPFIA4	Transient	224.376	799.754	4116.47	2848.52	1611.9	1198.19	1177.59	1358.31	1354.02
HDAC11	Transient	1004.71	1233.4	1946.36	2041.45	1834.4	1829.5	1594.96	1565.2	1630.54
ERN1	Transient	702.674	1196.2	3336.42	2348.99	1800.79	1448.86	1300.76	1185.48	1050.17
ZNF703	Transient	515.891	2651.74	2800.24	1532.25	1378.06	1419.65	1279.99	1362.54	1412.79
C1orf212	Transient	962.785	1490.41	2172.2	2169.53	1607.12	1408.46	1402.95	1458.27	1560.3
INPP5F	Transient	1099.42	1128.62	1774.94	2269.39	2141.29	1702.44	1426.43	1258.61	1392.56
SRGAP1	Transient	1230.43	1225.66	1479.93	2708.24	1970.32	1515.04	1431.8	1317.47	1209.07
SPEG	Transient	404.803	700.121	2931.39	3576.72	2589.04	1600.34	929.537	706.086	634.947
TNS1	Transient	490.051	483.231	4919.42	4042.91	1910.08	791.958	474.987	344.663	520.283
FAM134B	Transient	1450.18	1689.05	2007.93	2334.36	1710.56	1356.28	1179.67	1135.41	1060.4
MBOAT1	Transient	757.099	870.764	2347.47	2410.76	1765.22	1508.06	1287.56	1340.37	1242.63
ADAMTSL5	Transient	366.556	1026.46	3126.26	2404.64	1655.89	1437.76	1212.35	1207.28	1037.18
SEC24D	Transient	784.389	741.373	833.925	1050.4	1862.57	2464.22	2472.94	1805.17	1442.95
CASP7	Transient	1064.74	1522.2	2390.29	2172.29	1591.52	1258.97	1121.39	1090.08	1241.74
OSGIN1	Transient	545.124	1424.95	3589.93	2160.34	1315.22	1151.42	1032.44	1175.76	997.798
SLC30A1	Transient	751.208	1576.51	2100.28	1982.86	1755.33	1604.94	1299.57	1147.03	1089.96
DBF4	Transient	1020.7	974.6	1177.27	1750.73	1793.15	1873.75	1716.56	1481.35	1492.23
C11orf24	Transient	852.473	1018.28	1505.71	1655.22	1707.35	1699.09	1585.27	1574.53	1591.22
C4orf10	Transient	932.772	1625.67	1973.13	1683.68	1597.32	1469.14	1401.7	1270.42	1133.17
EGR1	Transient	767.182	1289.62	928.562	1645.09	2227.12	2036.37	1700.72	1192.05	1210.32
C14orf132	Transient	763.412	1431.32	2447.67	1979.27	1644.67	1259.54	1067.75	1075.99	1287.87
AQP3	Transient	698.308	1467.35	1950.4	1997.09	1977.22	1746.83	1488.56	972.402	601.018
CYP4F11	Transient	631.989	924.7	1595.57	1780.53	1873	1714.55	1591	1381.11	1381.08
OPN3	Transient	627.772	678.135	1027.18	1742.84	1833.03	1970.5	1877.2	1515.17	1452.64
PLA2G16	Transient	682.117	1083.99	1631.21	1804.18	1752.6	1566.47	1457.82	1352.83	1378.83
FZD7	Transient	762.78	2569.43	2763.17	1557.88	1036.86	962.314	931.044	1108.12	971.362
USP35	Transient	548.947	1448.47	3045.26	2638.34	1579.37	1021.25	738.871	770.487	744.692
SNAI1	Transient	234.151	5715.26	3070.94	701.554	529.113	477.593	574.515	629.039	564.424
INPP5A	Transient	977.866	900.127	1295.08	2301.05	1999.18	1571.27	1239.41	1048.26	1033.17
SHB	Transient	939.96	1052.22	2541.3	1814.43	1402.16	1187.47	1096.07	1025.22	1144.95
KLF4	Transient	502.375	2026.52	2101.09	1677.31	1463.52	1272.53	1108.36	939.481	915.953
B4GALNT3	Transient	521.142	549.375	1849.45	2057.51	1826.21	1517.88	1210.89	1155.08	1177.59
JHDM1D	Transient	922.639	1287.12	1867.04	1629.21	1460.93	1173.22	1176.74	1122.98	1042.29
SLC17A9	Transient	292.94	772.253	2001.44	1835.24	1513.18	1510.09	1198.69	1225.44	1238.71
PLEKHA7	Transient	1130.61	1213.97	1667.54	2428.63	1827.26	1083.86	721.81	694.719	779.765
CILP2	Transient	162.624	573.621	1693.76	1765.98	1748	1859.74	1630.13	1253.97	795.609
PAX9	Transient	470.082	1281.11	1569.57	1651.17	1379.05	1308.03	1316.22	1286.08	1219.93
BAI2	Transient	528.452	642.711	1749.14	1541.11	1545.86	1512.71	1340.92	1256.28	1249.63
CHDH	Transient	750.13	1153.52	1662.33	1373.22	1356.19	1224.56	1138.14	1180.92	1344.84
RAI14	Transient	610.658	549.081	791.471	1540.66	2037.86	1847.88	1667.02	1206.49	919.875
ZNF295	Transient	794.35	1302.35	2073.12	1498.26	1288.28	1181.93	999.523	911.541	1074.55
PIM1	Transient	477.012	2345.43	1031.15	1082.85	1154.82	1115.85	1095.99	1292.7	1313.05
FAIM3	Transient	269.799	875.544	1314.97	1443.38	1382.31	1502.17	1496.26	1328.14	1272.92
MCF2L	Transient	878.543	952.849	1773.73	2418.14	1896.54	1106.23	653.781	530.123	619.201
SMOC2	Transient	391.618	375.039	515.863	1674.99	2009.24	2152.25	1743.94	992.958	876.219
COL27A1	Transient	393.326	495.729	552.59	828.624	1689.43	1899.05	1825.26	1652.18	1189.05
RPS6KL1	Transient	738.213	860.19	1601.33	1759.12	1423.67	1304.1	1163.67	934.995	735.248
FAM189A2	Transient	569.23	564.255	1211.97	1436.07	1429.29	1450.68	1295.36	1286.91	1249.24
PSD2	Transient	105.69	648.311	4035.77	3140.04	1241.77	597.385	324.048	249.182	150.109
RGS10	Transient	716.414	937.922	1328.82	1577.06	1416.92	1281.56	1107.46	976.797	1091.14
TBC1D10A	Transient	628.756	1578.02	2145.37	1439.74	1093.66	877.776	808.8	757.423	807.726
MARS2	Transient	696.476	867.518	1564.47	1433.68	1402.08	1204.39	984.754	1003.69	898.844
CRELD2	Transient	707.161	768.799	914.179	1037.49	1231.07	1314.29	1370.41	1466.79	1155.13
FLVCR2	Transient	762.747	1179.38	1976.99	1572.93	1240.07	1005.34	836.453	736.243	649.375
PPP1R3B	Transient	707.136	1423.67	1331.03	1317.21	1304.67	1041.66	979.77	893.435	888.844
CISH	Transient	540.035	1149.73	1073.4	1285.55	1326.23	1210.97	1066.36	1016.33	971.32
PGBD5	Transient	380.83	361.698	1825.33	2266.81	1302.91	966.055	834.356	767.676	794.968
SLC12A4	Transient	307.478	1010.99	2349.23	1940.22	1235.87	917.467	604.525	572.42	527.354
ZFP36	Transient	718.991	1581	1287.86	1092.33	1015.38	934.493	851.651	911.242	849.778
KIF12	Transient	495.115	552.239	947.628	1123.06	1207.84	1280.45	1285.6	1252.93	1030.98
ANKH	Transient	543.928	577.703	686.393	944.541	1224.71	1392.54	1323.59	1277.4	1178.39
BARX2	Transient	512.046	792.214	1261.55	1218.33	1128.28	1013.97	1022.28	1061.43	1066.4
SPSB1	Transient	685.521	1584.44	1712.45	932.809	863.028	819.641	796.494	860.281	802.904
SLC37A3	Transient	449.596	679.653	1269.17	1715.88	1426.06	1147.36	925.529	705.71	724.555
DGAT2	Transient	520.501	602.581	897.146	1134.07	1184.46	1223.52	1201.8	1147.43	1092.65
IL20	Transient	115.396	787.601	861.185	906.48	1005.92	1091.97	1304.83	1287.73	1584.67
FHDC1	Transient	596.427	1207.65	1212.55	940.101	964.743	936.583	869.948	940.392	1106.31
SHISA2	Transient	556.54	854.196	1216.75	1404.14	1214.47	1077.89	908.111	703.176	687.931
IER5L	Transient	622.462	1484.57	1345.13	913.742	887.771	928.9	843.439	793.511	737.752
RPS6KA2	Transient	520.26	483.17	832.744	1485.48	1532.25	1343.95	1028.48	744.133	585.25
SHROOM2	Transient	767.224	773.326	1563.62	1124.89	855.262	854.677	878.148	926.871	810.67
FJX1	Transient	552.416	728.859	1079.41	1010.55	1057.66	1131.8	1106.84	1015.93	843.446
LRG1	Transient	257.759	917.599	1455.91	1441.41	1076.15	861.603	739.427	872.689	899.769
GALNT4	Transient	519.084	889.083	1136.06	1212.39	1041.82	1035.57	918.257	861.701	761.132
CDC42EP1	Transient	404.471	1062.37	2164.45	1267.73	865.395	846.148	714.809	561.081	481.76
TOE1	Transient	533.844	985.234	1196.61	1144.88	994.658	902.089	839.958	828.377	925.1
NEIL2	Transient	483.542	599.719	951.78	1110.12	1092.01	1002.3	1012.45	959.004	884.292
ATP6V1C2	Transient	398.305	481.912	897.071	1226.27	1193.01	1146.2	1113.91	838.696	581.925
KLF16	Transient	579.917	892.441	1336.69	975.439	869.035	884.343	799.1	764.822	770.329
LOC221710	Transient	527.985	641.12	968.024	1078.21	960.197	948.573	891.015	910.842	920.959
C12orf34	Transient	307.432	555.045	1577.54	1120.68	942.977	864.096	770.622	736.44	849.616
DAPK2	Transient	336.613	385.536	1539.85	1649.02	1158.52	814.01	648.964	486.996	376.923
ARHGEF18	Transient	614.431	585.043	1473.87	1262.55	976.454	746.879	602.43	555.027	554.925
SLC16A6	Transient	453.473	1477.68	1168.08	876.061	803.978	769.259	632.173	503.016	564.228
CARD10	Transient	380.602	464.29	998.87	1033.7	925.575	1007.15	830.082	778.847	795.734
HIVEP3	Transient	493.125	486.167	992.669	1055.71	1081.75	939.225	706.282	695.745	658.791
CYP4F22	Transient	394.7	502.479	926.514	1071.01	1002.11	982.381	795.672	742.064	563.08
SGK1	Transient	158.393	1392.46	1256.79	938.346	720.035	580.515	641.228	614.065	674.043
PPTC7	Transient	506.483	884.181	1187.5	927.721	784.866	706.112	718.598	608.191	614.582
PTPRE	Transient	181.244	163.76	1301.26	1501.98	1165.3	910.835	721.352	514.474	458.576
SPATS2L	Transient	337.242	353.572	627.132	918.056	1021.31	973.445	989.065	818.641	754.337
DNAJB9	Transient	454.504	310.004	391.915	959.988	1195.77	1237.75	917.198	661.218	570.884
ARMCX2	Transient	364.599	388.198	732.991	1031.47	1006.3	903.224	808.166	637.22	737.337
KCTD21	Transient	619.801	761.846	1353.71	1071.3	656.497	534.843	501.302	558.839	544.362
TIFA	Transient	255.894	589.362	1117.81	1088.49	751.873	624.904	652.458	701.554	813.101
GPR37L1	Transient	254.872	663.733	1198.86	1206.87	1033.41	840.595	569.357	418.325	360.334
MECOM	Transient	595.968	591.478	495.07	495.855	1148.17	1211.33	822.984	540.09	536.503
VDR	Transient	471.051	617.654	1450.57	1194.76	750.686	620.41	496.523	398.958	406.49
C15orf59	Transient	275.075	422.609	882.827	983.784	907.557	892.206	704.667	677.212	654.173
REEP1	Transient	385.975	387.053	618.196	912.064	984.645	899.25	725.826	598.152	797.439
XYLT1	Transient	421.697	429.858	407.762	1138.55	1243.17	864.518	601.754	561.351	627.741
PDLIM2	Transient	302.362	1131.59	1312.71	904.883	696.346	607.782	479.08	416.373	401.214
C14orf49	Transient	152.122	152.214	1469.79	1451.77	1047.81	679.687	463.981	356.948	431.413
LINGO1	Transient	329.798	469.624	1019.71	1032.3	980.256	832.216	604.002	463.455	420.368
PADI2	Transient	365.623	439.55	831.831	833.317	816.09	822.768	795.589	724.754	492.093
SPNS2	Transient	190.305	519.945	1782.48	1494.33	780.196	544.039	317.847	279.57	181.997
RELT	Transient	332.918	440.418	807.067	832.004	843.475	778.701	700.007	626.482	669.879
MAP3K14	Transient	396.095	868.878	936.932	838.649	733.876	655.905	520.484	503.698	481.555
RHOU	Transient	403.146	1366.61	1343.23	683.191	431.119	404.257	390.159	442.164	418.181
PITX1	Transient	349.918	570.948	1121.39	906.011	727.849	674.964	526.893	471.202	454.668
PRKAG2	Transient	457.543	676.025	1104.6	909.432	598.54	492.455	487.742	514.247	526.324
ARHGEF3	Transient	312.001	303.944	314.562	1482.53	1270.94	752.47	537.459	390.082	385.849
SLC26A1	Transient	282.778	440.292	957.129	698.684	739.523	721.601	607.426	592.661	474.507
PHLDA2	Transient	320.634	471.195	728.494	651.918	831.771	843.581	674.705	554.546	408.814
MYO18A	Transient	670.18	607.818	817.02	818.45	784.352	614.867	439.681	373.749	315.523
HEG1	Transient	173.913	1007.73	1965.27	609.041	339.156	283.224	270.794	319.21	456.438
HLA-DRB1	Transient	242.558	482.792	717.219	797.427	756.722	694.91	611.15	561.229	497.459
C16orf74	Transient	368.86	383.135	694.622	808.193	645.992	610.052	624.71	574.293	588.23
PPM1K	Transient	262.33	301.66	610.984	881.903	801.273	690.873	627.562	554.943	560.574
PMAIP1	Transient	160.066	460.763	581.114	815.335	701.041	685.695	696.488	584.406	588.332
ITGA6	Transient	318.176	331.166	646.13	868.486	771.846	688.662	540.104	503.801	542.832
GRM4	Transient	462.298	507.016	745.384	918.195	886.168	692.413	463.206	264.479	187.652
SRFBP1	Transient	375.321	357.684	614.27	780.919	690.655	663.085	575.256	517.481	486.669
CRISPLD2	Transient	437.075	609.211	1809.54	856.246	352.924	283.124	197.419	232.681	265.793
SLC25A42	Transient	348.807	422.935	1271.95	872.027	493.47	405.51	354.365	376.99	463.579
ZNF669	Transient	307.596	604.961	612.63	616.897	598.594	546.774	473.176	505.183	493.67
MAN1A1	Transient	304.913	309.258	303.503	493.575	637.992	755.061	762.922	650.658	530.798
KSR1	Transient	303.227	336.016	936.068	889.111	695.47	474.532	399.917	340.492	368.731
UST	Transient	337.235	361.085	350.652	932.557	851.731	639.752	450.315	391.119	412.413
SLC6A9	Transient	380.274	382.748	380.187	428.422	519.597	666.607	724.873	768.858	471.146
RNF150	Transient	231.92	275.092	498.787	615.355	760.261	759.388	581.926	511.741	463.94
LOC348926	Transient	314.912	434.688	567.903	568.99	605.149	605.848	641.896	486.283	460.24
CSGALNACT2	Transient	344.436	530.335	691.938	619.742	535.909	499.671	478.007	432.995	493.817
SLC45A4	Transient	379.495	392.839	1123.11	644.909	449.418	394.592	344.141	402.202	393.808
PLEKHO2	Transient	240.776	723.216	962.929	556.712	437.223	360.351	321.82	375.277	415.12
C6orf132	Transient	168.65	506.736	1137.28	730.279	522.126	398.854	327.699	280.244	297.231
B3GNT3	Transient	250.694	632.391	890.252	672.556	507.134	367.354	303.065	330.886	396.996
TMEM51	Transient	319.902	478.772	767.395	655.094	487.611	425.938	394.6	382.006	395.349
MAN1C1	Transient	263.502	284.066	573.463	768.495	690.87	589.581	433.617	295.214	382.232
ZFYVE28	Transient	388.486	408.972	692.546	856.979	538.02	426.386	320.037	331.665	280.911
GUSBP1	Transient	326.32	353.504	462.814	686.334	613.286	533.54	403.428	391.526	390.247
GCOM1	Transient	153.862	899.761	1427.79	672.732	247.025	166.601	144.715	219.348	212.436
CCNJL	Transient	216.335	301.768	866.339	656.52	445.11	361.087	328.742	412.961	477.747
LRRC15	Transient	156.244	493.82	739.237	703.055	610.066	544.598	426.961	277.732	114.312
PPM1J	Transient	242.507	592.621	612.448	481.683	422.765	435.576	408.292	429.19	435.832
FSTL4	Transient	192.718	229.103	436.404	625.521	651.232	661.226	494.741	420.335	332.974
ACE	Transient	162.675	228.544	811.192	627.882	472.788	504.661	455.912	392.945	365.698
EEPD1	Transient	195.685	179.137	1383.37	847.021	407.742	282.26	205.219	195.72	233.011
DENND5B	Transient	249.628	232.659	493.252	665.587	633.767	463.164	386.065	361.842	396.353
CCDC69	Transient	240.593	295.154	545.088	594.619	527.693	485.34	441.606	349.895	369.336
SLC7A11	Transient	132.449	173.472	214.664	345.371	508.642	708.085	755.719	644.972	306.824
ENTPD7	Transient	288.725	252.973	297.354	483.345	551.574	586.952	490.88	424.941	394.564
FUT4	Transient	188.797	692.836	552.635	374.847	358.331	363.543	384.579	350.979	367.857
CGNL1	Transient	197.291	196.886	521.047	668.044	620.635	462.859	342.017	253.922	221.347
ZNF823	Transient	326.231	735.858	400.616	349.289	348.544	297.769	302.121	344.848	349.73
HLA-DRB5	Transient	134.574	244.994	457.631	504.72	474.148	425.493	441.206	392.702	357.662
KCNJ11	Transient	297.563	640.012	782.053	360.406	275.291	224.848	228.153	256.908	287.664
ARHGAP26	Transient	214.865	204.075	174.155	288.708	659.858	694.459	499.32	305.347	243.874
CYR61	Transient	263.359	612.515	359.537	383.539	316.577	319.82	312.528	312.267	320.455
RAB11FIP5	Transient	229.741	379.615	587.246	447.804	332.95	313.972	263.024	285.993	347.184
KCNF1	Transient	150.948	432.562	757.13	474.977	321.261	281.332	288.776	238.383	224.406
TMPRSS4	Transient	194.263	219.855	388.374	431.953	421.808	416.235	395.446	342.949	314.976
ZNF462	Transient	147.793	126.325	374.902	446.115	569.78	453.211	391.414	315.94	280.424
DIRAS1	Transient	186.372	292.323	638.178	545.245	391.766	327.346	251.721	241.225	231.043
FGD1	Transient	203.684	229.627	432.663	456.744	431.222	347.8	310.531	293.071	398.147
ARAP2	Transient	218.668	198.397	200.916	315.755	415.661	458.473	490.462	386.643	378.856
ZBTB46	Transient	291.221	328.411	855.31	421.969	254.3	233.551	205.432	226.319	197.945
PINX1	Transient	213.982	246.086	364.959	437.606	418.725	341.228	339.744	321.31	329.633
UBE2QL1	Transient	287.09	272.661	434.764	495.573	419.543	326.473	282.309	246.371	247.165
PRDM16	Transient	258.083	231.366	216.421	602.833	846.837	407.407	175.425	119.741	117.974
RASL11A	Transient	120.927	284.266	391.589	482.744	389.876	365.141	293.198	264.277	291.988
MERTK	Transient	118.936	142.434	450.5	612.71	505.717	335.09	274.012	231.548	200.459
EN2	Transient	145.599	363.443	791.132	386.221	255.95	247.148	242.406	242.578	191.658
DUSP5	Transient	204.553	479.374	211.456	251.423	309.888	334.376	337.397	314.115	377.314
LRP5L	Transient	189.177	456.655	490.731	294.41	293.809	266.666	224.434	264.987	235.077
SLC16A9	Transient	188.304	190.086	305.783	272.821	342.803	419.887	376.609	302.67	315.4
ZDHHC14	Transient	144.771	193.728	148.652	330.032	442.916	418.193	392.447	328.364	308.609
PXK	Transient	153.03	162.605	378.395	397.161	351.324	318.866	307.944	270.813	333.368
ALDH3B1	Transient	145.07	249.434	452.57	412.896	371.398	329.916	286.485	203.783	145.72
LYPD1	Transient	176.069	220.297	365.551	371.654	312.502	273.476	274.298	270.168	301.303
ARC	Transient	160.637	679.1	494.75	237.06	219.799	198.142	190.443	192.476	188.052
PSTPIP2	Transient	193.213	225.39	373.839	438.807	351.828	281.098	237.43	189.048	226.912
SH2B3	Transient	193.072	250.138	388.201	315.662	292.833	280.963	241.337	247.317	260.69
PRDM6	Transient	162.929	150.162	309.68	356.08	339.823	310.726	271.294	280.515	288.483
HSD11B2	Transient	151.664	279.399	433.329	395.989	291.298	257.583	197.153	171.667	184.075
FICD	Transient	142.372	197.522	218.468	259.342	373.197	361.428	269.214	239.663	289.596
PRR5	Transient	207.686	251.335	457.558	358.389	270.482	238.108	196.6	197.717	149.714
POLR2J2	Transient	244.562	434.044	347.313	210.916	239.372	327.056	78.8087	176.304	253.21
UBTD1	Transient	162.775	206.67	407.787	393.218	276.058	249.953	199.087	171.584	141.304
C19orf26	Transient	144.07	226.76	371.301	280.18	262.852	262.477	196.787	171.282	147.821
SOCS1	Transient	148.481	587.549	436.402	208.856	139.501	131.088	128.714	130.732	136.062
TRIM47	Transient	119.632	308.185	379.924	265.263	208.576	221.874	188.968	154.447	160.097
CAPN5	Transient	200.161	293.508	365.684	315.457	244.755	210.222	145.922	103.194	89.8669
RFTN1	Transient	145.709	148.771	198.673	276.321	305.732	313.548	252.657	176.46	148.21
LRP4	Transient	144.885	179.587	304.131	283.404	245.518	218.968	191.14	168.63	191.432
CSPG4	Transient	116.684	288.042	540.181	307.932	185.676	132.08	115.601	111.885	128.163
PPARGC1B	Transient	148.143	145.244	467.182	242.573	222.181	190.81	175.209	172.805	150.191
PLXNA2	Transient	107.375	110.698	282.972	344.919	273.997	176.397	148.216	178.869	245.276
SCNN1A	Transient	152.965	216.831	342.875	286.663	233.654	192.032	157.019	129.774	110.722
PTCHD2	Transient	143.381	183.945	404.794	283.274	208.894	171.417	151.54	106.945	113.284
NKD2	Transient	104.12	123.365	380.364	334.187	271.572	187.974	152.674	104.39	88.348
HAP1	Transient	102.862	176.996	404.329	343.065	237.155	168.772	135.193	88.6659	85.1031
CHST11	Transient	139.825	169.213	249.568	327.264	252.671	191.125	132.697	106.459	109.355
MAP3K8	Transient	102.645	538.114	329.947	174.626	116.362	102.336	102.925	96.9083	113.551
CACNA2D2	Transient	105.233	127.028	156.776	224.718	245.995	290.945	207.459	206.971	102.349
SH3TC1	Transient	130.89	220.847	533.554	215.838	122.033	117.899	106.477	95.2898	91.4486
CD82	Transient	107.455	108.61	234.194	226.74	217.312	216.144	206.573	136.323	128.13
SNED1	Transient	173.102	181.842	260.825	241.04	194.001	178.154	139.592	108.352	92.4773
EPAS1	Transient	122.22	175.886	299.786	278.713	205.694	172.617	106.756	88.9863	93.4515
SLC25A45	Transient	140.449	213.666	319.328	221.096	138.615	133.796	103.905	121.191	107.934
ANKRD6	Transient	104.419	100.463	144.057	219.281	197.699	177.893	163.051	148.581	153.315
S100A9	Transient	118.241	165.577	172.062	169.741	154.207	160.89	147.29	174.048	145.603
KCTD6	Transient	102.389	269.726	255.872	169.405	132.418	114.899	114.94	99.5635	131.495
RAB36	Transient	124.125	148.869	259.995	205.332	129.382	114	111.615	126.202	133.323
FRMD5	Transient	119.559	119.296	136.522	253.179	216.063	143.552	140.83	100.989	120.843
DDX60L	Transient	138.189	135.767	165.995	158.087	157.444	128.19	116.2	86.505	70.2433
ELFN1	Transient	101.515	103.194	204.818	128.801	97.7879	106.435	81.1868	78.0856	84.5728
KRT17	Transient	104.396	104.476	97.8754	99.2452	101.401	85.1822	81.9213	84.9186	60.7439
GATA3	Repressed	19629.3	11206	7446.41	10834.5	14023.9	15122	14164.4	13283.5	12073.8
AHNAK	Repressed	19524.9	18097	13334.7	8703.83	9049.83	8230.22	8987.85	10803.5	10909
CD24	Repressed	15015.3	14741.5	11766.4	10314.4	8175.78	8546.8	7937.27	7676.71	7655.69
SYTL2	Repressed	14485.3	16278.7	12454.8	6355.29	5395.51	6288.57	7670.96	7488.18	5324.45
CLU	Repressed	10355.2	9859.52	9659.53	9365.48	8181.74	8233.57	7770.86	7986.62	6877.52
ZNF217	Repressed	15914.6	7783.17	6437.49	8200.18	8031.57	7745.18	7739.13	7234.53	6267.02
PLEC	Repressed	10806.3	10027.1	11210.8	6381.41	7447.03	7565.56	6359.83	6442.73	5260.5
MATN2	Repressed	10955.1	12434.6	11422.5	9146.97	6722.73	5709.66	4566.88	4011.15	4310.72
ESR1	Repressed	10392.5	9902.26	8038.79	4246.54	4421.14	5526.1	6935.7	7317.89	6469.53
CRABP2	Repressed	7838.93	8346.6	7453.76	7327.58	6299.48	5798.18	5592.85	5226.99	4315.79
ERBB3	Repressed	9858.63	9517.13	6963.26	4815.55	4377.47	4574.65	5114.1	5977.7	5638.12
CXCR7	Repressed	7718.86	8101.63	5790.47	6078.15	5825.34	5459.14	4874.31	4431.53	3743.86
TRIM16	Repressed	2186.42	7033.54	11870.5	8500.61	4417.68	3033.96	2450.81	2195	1946.59
TXNIP	Repressed	7467.13	2937.1	2447.4	3657.12	4120.23	4414.47	4581.69	4390.07	4332.54
NPNT	Repressed	6275.14	6589.78	5435.09	4333.58	3456.63	3058.55	2706.85	2814.92	3341.13
ELF3	Repressed	2961.65	14517.2	8318.15	4089.16	2033.09	1384.55	1355.16	1493.6	1368.45
CHD6	Repressed	5387.78	6393.33	4256.45	2652.51	3295.31	3593.48	3911.09	4287.83	3632.31
KIAA1522	Repressed	6506.96	5670.58	3996.92	3103.09	3415.51	3522.87	3376.96	3610.02	3430.83
SELENBP1	Repressed	5895.51	5863.56	4764.93	4059.59	3485.99	3280.95	3156.71	2933.57	2270.98
ITGB4	Repressed	6194.72	5490.58	5048.65	3155.6	2761.47	2764.22	2724.81	3448.36	3709.64
C6orf211	Repressed	4952.5	3921.79	2410.37	2922.28	3435.19	3989.24	4257.85	3572.38	3748.66
SEMA4C	Repressed	6407.18	5492.86	2719.32	2798.58	3171.42	3227.43	3213.59	3161.53	2776.12
C17orf28	Repressed	4216.19	4602.97	5036.38	4035.81	3568.53	3279.78	2883.35	2593.25	2106.84
KYNU	Repressed	4874.87	5028.62	3823.58	3261.42	2708.07	2715.72	3067.52	3296.81	2967.2
PCSK6	Repressed	4834.52	5255.12	4857.21	3396.83	2436.15	2216.68	2003.89	2243.52	2203.22
GPER	Repressed	5418.09	3402.84	1861.52	2031.57	2500.31	2873.81	2974.88	3298.02	3130.92
ABCC5	Repressed	4987.89	5074.45	3256.25	2114.74	1944.36	1992.32	2052.33	2172.26	1929.23
RBL2	Repressed	4453.05	4481.68	3139.92	2149.92	1729.14	1662.1	1814.31	2113.2	2424.5
TRPS1	Repressed	3400.39	3238.27	2133.02	1218.17	2386.87	2855.47	3173.52	3063.5	2400.22
DKK1	Repressed	2894.7	970.72	1051.6	2724.13	3117.17	3597.93	3638.49	2932.67	2380.83
MYO1B	Repressed	4192.4	4196.45	3271.26	2243.49	1755.54	1768.21	1891.3	1864.4	1720.89
HIST2H2BE	Repressed	3217.11	3412.57	2885.27	2681.1	2529.12	2585.41	2240.72	1743.82	1507.42
BCL9L	Repressed	4591.53	3388.97	1816.19	1889.58	2419.72	2470.5	2121.84	2066.58	1890.49
MYH14	Repressed	3774.53	3104.24	3178.34	2414.96	2240.35	2041.19	1769.79	1806.77	1732.76
INHBB	Repressed	1569.99	3955.08	4612.27	2742.41	1963.13	1916.18	1688.15	1698.47	1427.39
ANKRD50	Repressed	3336	1812.79	951.104	2097.43	2706.87	2768.76	2692.33	2383.08	2268.16
EFEMP1	Repressed	3510.67	3834.98	3195.51	2632.13	2017.12	1572.79	1346.59	1375.08	1486.68
S100A16	Repressed	2714.41	2727.57	2563	2537.89	2174.84	2109.41	2113.83	1828.87	1522.13
ERBB2	Repressed	3878.81	3749.64	2949.31	1916.4	1444.54	1403.96	1442.87	1589.05	1494.47
PCDH10	Repressed	3303.07	2575.97	1161.77	1202.66	1779.93	2246.86	2431.37	2520.28	2365.27
SRGAP2	Repressed	2927.9	2805.53	1941.58	1397.93	1670.16	1981.94	2218.81	2289.78	2238.35
EPHA4	Repressed	3089.58	3014.89	939.281	1366.7	2003.36	2248.68	2327.64	2376.86	2058.13
PLK2	Repressed	3813.2	1503.52	1458.56	1831.99	2001.05	2268.9	2229.68	2182.95	2116.85
L1CAM	Repressed	3378.36	3239.98	3124.47	2229.46	1824.66	1704.86	1362.38	1336.21	1182.04
ADCY6	Repressed	2895.06	2909.38	2568.02	2043.04	1821.17	1669.78	1584.03	1728.04	1818.43
PIK3R3	Repressed	3735.42	3210.73	1380.67	1553.18	1875.78	1842.96	1801.94	1653.79	1605.71
HIST2H2AA3	Repressed	2455.81	2398.27	2417.48	2125.39	2028.06	2068.32	1890.79	1772.81	1267.51
RERE	Repressed	2770.34	2988.89	2424.3	1106.18	1396.73	1678.33	1807.66	1993.26	1839.92
AMIGO2	Repressed	2472.21	1640.53	592.667	946.115	1708.53	2274.83	2721.14	2774.11	2864
SLC12A2	Repressed	2369.58	2345.12	1808.46	1566.32	1810.22	2069.66	1959.48	1671.67	1473.59
SLC9A1	Repressed	2914.83	2721.09	2335.67	1634.97	1580.49	1530.93	1430.54	1424.73	1311.99
NOTCH3	Repressed	3198.13	2923.38	2399.66	1262.78	1182.81	1309.52	1297.83	1556.83	1578.05
SPDEF	Repressed	3062.15	2912.84	2393.92	1515.15	1374.33	1338.38	1312.38	1361.94	1371.23
CDH3	Repressed	3099.48	3087.66	2504.99	1625.83	1181.74	1141.95	1198.26	1371.93	1357.23
RAB3D	Repressed	3229.14	2520.13	1716.66	1458.76	1506.54	1567.09	1574.03	1533.57	1357.52
PRKCD	Repressed	1955.49	2633.7	3205.03	2520.01	1560.78	1191.51	1059.83	1149.55	1126.47
RFX5	Repressed	2719.85	2757.2	2209	1784.72	1380.35	1191.49	1219.21	1230.05	1248.63
MIDN	Repressed	1580.67	3199.6	2225.37	1793.15	1684.92	1497.76	1293.61	1259.76	1171.43
PDGFB	Repressed	1365.53	3297.15	2547.98	1682.04	1552.65	1474.92	1386.28	1319.37	1070.79
PPM1H	Repressed	2083.48	1892.48	1653.74	1018.65	1288.89	1680.84	1937.56	2002.49	1928.72
CGN	Repressed	2743.31	2774.38	2130.6	1326.94	1180	1211.87	1269.75	1393.37	1240.57
ALDH4A1	Repressed	2109.95	2058.18	2080.22	1872.57	1619.96	1604.91	1420	1261.57	938.538
ARHGAP32	Repressed	2045.48	1741.71	624.82	1027.55	1836.92	2046.37	2102.09	1886.07	1561.19
PPL	Repressed	2814.97	2804.54	2459.16	1617.32	1196.64	990.121	888.757	996.882	1091.83
NCOA2	Repressed	2174.42	2359.83	1867.11	954.915	1367.97	1479.9	1536.33	1532.33	1448.02
CDKN1A	Repressed	2424.11	2717.89	1901.41	1304.51	1254.98	1298.06	1188.82	1124.93	1125.96
FAM102B	Repressed	2392.67	2546.05	1751.87	1342.37	1065.99	1109.93	1192.06	1329.99	1459.69
CTSH	Repressed	1913.52	1938.18	1828.81	1696.85	1404.73	1424.2	1325.44	1227.69	1050.38
FAM115A	Repressed	1919.96	1874.06	1161.75	937.732	1188.33	1374.26	1504.27	1746.03	1800.17
PRSS8	Repressed	2285.04	2245.61	1900.51	1356.21	1141.69	1148.08	1121.8	1187.38	1118.48
CKMT1B	Repressed	1818.9	1675.37	1736.47	1705.93	1476.35	1255.47	1391.7	1503.82	885.215
SKIL	Repressed	1287.14	2621.59	2292.13	1388.59	1268.01	1247.95	1201.38	1057.47	955.693
CTNND2	Repressed	1827.97	1860.99	1808.44	1599.17	1583.96	1236.62	898.008	1092.31	1300.99
MXD1	Repressed	1091.03	2144.63	2377.86	1671.01	1345.73	1194.46	1156.57	1035.56	1016.76
GALNT10	Repressed	1648.75	1803.26	1815.8	1543.3	1434.97	1425.62	1256.84	1154.35	841.117
ANK3	Repressed	2067.26	2032.68	1902.33	1636.2	1402.41	987.077	776.003	867.338	939.407
PIK3C2B	Repressed	1921.3	1791.6	1317.45	920.98	1163.75	1343.55	1398.62	1457.88	1294.27
PLEKHA6	Repressed	2148.22	2043.52	1617.49	1091.64	977.294	937.342	1106.67	1296.84	1293.01
PTPN13	Repressed	1873.72	1863.6	1422.63	904.373	892.981	1031.41	1268.78	1548.8	1419.57
SOCS3	Repressed	1217.25	3348.14	2026.04	1210.84	795.246	696.737	718.247	743.842	658.437
CD55	Repressed	1876.78	1891.11	1303.63	1074.78	1039.67	1050.93	1052.29	1059.77	988.515
AIM1	Repressed	2064.43	2074.69	1662.31	906.172	616.852	687.005	910.969	1131.7	1129.92
RHBDF1	Repressed	1651.05	1694.66	1524.5	1139.39	1096.88	1092.46	971.734	943.891	817.726
LAMB1	Repressed	1960.62	1809.74	1563.64	1180.15	933.674	868.806	841.521	897.654	821.028
SOX13	Repressed	1767.1	1783.32	1076.14	790.329	973.032	1060.4	1119.94	1137.48	1129.34
KITLG	Repressed	2271.51	1858.56	714.653	734.808	883.884	1100.25	1139.58	1004.28	946.104
TMEM150C	Repressed	1782.32	2049.2	1435.63	879.325	658.038	693.881	881.283	1125.38	1122.12
PLEKHF2	Repressed	1816.07	1615.79	983.918	1111.67	1049.82	1035.75	1003.84	905.395	935.119
OSR2	Repressed	1330.58	521.838	688.388	1048.2	1179.41	1382.91	1447.61	1464.21	1388.9
COBLL1	Repressed	1365.47	1361.07	1031.35	664.818	969.386	1275.05	1343.61	1262.73	1021.81
HBP1	Repressed	1650.63	1402.52	824.572	782.295	946.204	1104.98	1187.09	1155.62	1033.72
SLC6A14	Repressed	1634.61	1573.88	811.512	553.046	691.299	925.662	1187.21	1345.5	1271.09
PRIC285	Repressed	1760.52	1839.91	1423.99	748.991	808.027	854.817	767.562	864.966	812.259
TMPRSS2	Repressed	671.639	2975.68	3340.86	1159.28	468.985	316.255	291.252	292.738	295.216
TMEM184A	Repressed	1490.33	1457.1	1445.25	970.747	931.928	965.163	891.365	883.716	717.188
TUFT1	Repressed	1607.23	2426.82	1208.76	680.885	748.366	734.52	745.51	741.527	793.791
IRX5	Repressed	1380.1	559.573	612.185	961.371	1214.66	1313.46	1358.27	1210.6	1019.54
CDC42EP4	Repressed	1592.18	1287.22	668.544	834.594	998.897	1005.75	1040.7	1092.57	1068.08
FAM53B	Repressed	1777.17	1548.52	948.211	747.971	857.389	966.856	898.824	883.231	853.802
ATP2C2	Repressed	1315.84	1429.82	1599.53	1384.6	1050.81	911.738	685.837	557.548	527.385
ARRDC3	Repressed	1091.88	970.954	450.279	855.061	1235.03	1329.89	1257.57	1037.66	1208.46
MAFB	Repressed	621.491	2306.13	1555.03	1155.55	910.238	804.033	717.865	731.07	615.744
CLN3	Repressed	1504.95	1522.44	1339.74	1043.78	793.297	749.199	725.288	832.816	836.298
CBX6	Repressed	1753.92	1471.33	1258.45	853.553	815.642	890.841	800.516	761.23	701.655
CTSL1	Repressed	1349.53	1413.24	1189.97	1102.3	881.976	827.768	825.177	838.187	779.917
TACC1	Repressed	1549.95	1718.95	902.735	650.639	719.481	841.979	888.882	935.807	969.562
RAPH1	Repressed	1325.36	1264.06	642.905	641.728	920.684	1037.23	1029.76	977.255	993.821
FLJ45983	Repressed	1579.03	1342.05	1009.83	800.158	733.038	780.112	851.611	895.248	835.093
IRX3	Repressed	1549.18	966.691	717.581	816.546	901.771	945.149	942.576	971.066	961.998
SIDT1	Repressed	1466.87	1411.62	838.408	498.286	598.963	816.547	1018.56	1077.5	988.275
TRAM2	Repressed	1400.69	1505.22	1108.61	743.94	780.753	802.233	739.858	690.612	725.658
MXD4	Repressed	1496.95	1389.6	1322.9	918.691	694.784	643.244	615.651	608.639	533.015
HES1	Repressed	894.346	2553.35	1107.39	952.251	664.388	546.863	534.821	510.841	454.968
TAOK3	Repressed	1460.23	1407.47	1116.67	936.073	809.122	639.933	600.433	586.174	574.018
PMP22	Repressed	1824.05	1718.4	902.694	485.232	502.524	643.67	752.289	701.466	516.959
PTPRJ	Repressed	1444.6	1388.67	1054.66	644.013	635.485	680.283	682.245	696.95	776.148
MKNK2	Repressed	1437.81	1264.69	854.455	744.494	726.579	763.546	732.822	757.144	717.841
HIST1H2AC	Repressed	1243.62	1327.06	1088.03	999.625	778.462	809.522	690.255	503.465	531.014
GPRC5A	Repressed	841.28	1772.49	1155.18	803.546	670.839	645.237	638.117	663.786	708.165
NBEA	Repressed	1294.21	1385.11	1336.95	1110.77	893.792	555.47	377.4	396.676	490.3
NEDD4L	Repressed	1448.63	1646.23	1441.96	774.934	439.245	393.633	465.655	526.114	629.841
RARG	Repressed	1448.29	1127.24	535.187	423.891	578.884	676.999	842.983	1038.86	910.3
C8orf83	Repressed	1175.76	1159.03	720.867	614.451	586.911	718.988	860.881	866.057	822.803
COMT	Repressed	1061.66	1046.57	1042.67	936.794	792.506	776.711	709.304	660.094	481.242
N4BP3	Repressed	1111.3	1729.23	1138.42	567.939	572.937	626.784	577.856	627.366	548.037
TGFBR2	Repressed	1069.61	1010.67	417.082	540.765	802.421	933.218	934.885	872.126	846.09
C6orf97	Repressed	1216.85	1216.72	788.881	577.029	617.054	643.76	738.543	832.996	793.191
YPEL3	Repressed	1579.94	1365.31	989.44	566.001	427.765	499.425	591.448	703.974	683.866
EPB41L5	Repressed	1461.49	1504.21	995.056	565.374	547.723	566.463	569.644	586.786	609.643
YPEL2	Repressed	1035.43	1632.03	1584.8	807.936	496.992	417.834	456.751	493.919	476.05
IRF9	Repressed	1328.69	1277.57	1007.92	728.654	535.249	538.567	549.673	655.736	628.709
MME	Repressed	1149.59	1318.74	1139.62	1046.97	834.4	659.562	539.688	320.758	168.641
ARID5B	Repressed	1100.87	957.881	315.934	435.124	728.927	808.242	955.217	997.632	826.221
RAD54B	Repressed	703.331	636.637	346.832	523.421	794.217	913.243	964.757	1020.67	1155.76
UPK3BL	Repressed	1137.6	982.621	931.92	856.384	683.52	653.023	652.123	660.011	482.072
EPN3	Repressed	1310.54	1107.66	656.487	571.196	693.932	688.945	660.619	645.502	669.782
BCL3	Repressed	564.44	1722.65	1389.92	820.274	672.302	519.159	438.419	427.444	416.779
PROM2	Repressed	1164.37	1186.9	1067.55	814.901	671.566	635.516	547.776	467.383	364.751
ST3GAL4	Repressed	768.386	1142.69	1158.72	922.806	697.777	622.243	575.28	498.8	469.205
GOLPH3L	Repressed	975.168	707.152	452.61	568.344	770.858	813.324	866.17	833.314	856.049
C19orf21	Repressed	1253.71	996.797	515.54	446.927	601.435	706.909	774.5	836.145	693.304
HIST1H2BD	Repressed	1035.21	1079.93	812.46	818.805	762.657	685.913	580.041	513.784	490.663
BAHCC1	Repressed	1127.93	1138.88	824.306	324.661	320.245	460.819	633.858	1048.52	887.242
TMTC3	Repressed	1226.77	1049.31	645.494	630.239	604.588	712.291	690.443	581.839	625.019
FRAT2	Repressed	922.744	729.603	459.741	635.543	753.64	754.004	825.056	815.504	784.418
ABCG1	Repressed	1349.96	1458.88	1061.3	647.618	498.467	439.403	426.847	402.542	365.674
TGIF1	Repressed	913.292	510.094	441.204	592.838	782.231	852.171	879.112	846.053	757.435
TNS3	Repressed	864.058	903.553	1263.64	1448.54	797.791	492.318	307.955	275.691	204.76
KIAA1370	Repressed	1228.48	1300.07	735.314	508.565	549.832	585.823	565.619	547.508	535.283
TRIB1	Repressed	1004.33	388.258	458.673	744.025	865.496	893.603	830.989	683.014	652.971
CLMN	Repressed	1133.42	1232.71	1399.73	851.371	545.949	328.753	293.652	302.19	407.397
ALAD	Repressed	1109.01	1119.48	837.219	636.987	523.753	506.418	525.828	546.702	565.607
TSPYL2	Repressed	1168.38	931.069	669.686	652.923	671.215	656.764	596.64	531.804	478.765
BAZ2B	Repressed	976.092	935.276	719.13	414.96	537.999	618.307	697.535	741.942	709.786
CYFIP2	Repressed	1101.55	1194.75	1092.21	777.759	594.253	447.232	373.333	347.568	409.409
UNC13D	Repressed	943.149	954.993	933.429	686.83	622.434	616.94	521.898	518.378	435.943
DCLK1	Repressed	830.239	776.366	724.233	731.818	745.826	661.13	597.263	552.868	514.484
DTX3L	Repressed	1044.31	919.923	759.502	634.668	584.066	536.151	521.969	497.944	509.77
PRR15L	Repressed	1149.23	943.047	436.589	413.612	461.723	493.958	599.004	697.839	788.181
GATA2	Repressed	1011.23	1261.29	818.055	514.513	472.63	466.377	439.64	502.221	484.672
GTF2IRD1	Repressed	945.846	822.291	693.14	507.17	453.554	500.148	612.553	752.797	674.141
HSPG2	Repressed	817.199	795.288	1066.39	675.481	651.263	594.444	495.012	442.71	377.13
FAM83B	Repressed	1100.15	840.142	347.009	424.992	585.188	637.365	699.948	629.7	607.488
KIAA0922	Repressed	877.081	799.403	429.166	317.542	496.496	678.895	723.348	714.13	662.638
CAMK2B	Repressed	667.082	698.852	767.322	672.806	668.516	631.147	537.446	478.624	439.024
SIX4	Repressed	781.045	341.515	419.044	617.003	701.777	733.544	703.058	651.459	598.539
WNT7B	Repressed	904.267	950.881	779.193	447.928	462.543	493.797	474.139	494.902	485.609
TSC22D3	Repressed	807.782	1168.29	898.967	746.549	522.977	408.266	347.799	272.334	307.053
STEAP3	Repressed	733.305	774.445	802.185	664.444	575.767	529.216	468.136	470.223	411.892
CPEB4	Repressed	529.106	1414.89	849.511	659.162	517.828	447.311	357.272	313.285	321.984
C5orf42	Repressed	851.509	854.531	725.645	474.545	494.295	468.001	412.95	493.865	546.945
FAM160B1	Repressed	728.523	610.659	323.359	489.041	603.134	673.618	667.068	621.734	547.834
ENPP1	Repressed	903.634	778.959	502.012	397.481	407.023	464.455	527.195	593.727	668.578
BTG1	Repressed	971.54	561.009	262.707	460.309	483.557	597.527	656.981	641.151	606.213
SLC25A30	Repressed	1122.53	749.741	249.209	347.602	453.22	505.23	573.513	603.157	631.492
ALDH3B2	Repressed	806.424	801.378	732.254	601.66	536.007	516.594	436.369	407.768	335.496
RGS16	Repressed	454.683	1579.52	884.385	595.705	423.371	319.892	307.544	301.82	277.323
PCDH1	Repressed	885.532	1122.69	767.75	345.645	314.569	366.304	400.808	472.333	461.79
ACSS3	Repressed	858.783	840.587	731.028	582.359	482.763	403.924	376.04	400.639	443.663
SGCG	Repressed	1214.94	1066.67	636.621	322.162	227.038	295.537	373.712	480.657	491.839
OVOL1	Repressed	742.864	872.75	481.506	358.265	421.655	513.819	546.448	599.137	532.075
ARHGAP8	Repressed	803.183	810.496	755.493	597.568	529.396	458.442	416.042	355.946	296.787
BAK1	Repressed	1086.97	961.88	621.616	467.372	394.584	420.553	398.792	348.144	320.681
S1PR3	Repressed	853.946	748.982	506.471	437.985	465.46	512.545	541.1	497.013	432.074
PGM5	Repressed	975.936	1076.19	876.758	591.798	386.986	286.661	229.167	247.831	305.808
ZBTB10	Repressed	801.913	522.325	358.793	495.65	586.56	624.671	588.782	515.867	464.95
FURIN	Repressed	823.48	804.711	708.233	484.601	405.311	427.589	420.953	446.861	403.607
BST2	Repressed	667.189	703.989	659.079	613.839	518.406	512.069	437.684	426.594	356.394
LYPD3	Repressed	938.666	803.085	614.892	425.337	369.126	394.91	409.29	429.712	403.857
SALL4	Repressed	1003.26	834.289	618.269	470.987	394.733	380.233	395.298	415.647	272.591
TRERF1	Repressed	1082.65	1086.03	704.565	183.354	193.203	296.209	374.028	420.181	378.529
SHISA9	Repressed	716.686	789.421	586.49	319.469	358.14	446.19	514.923	493.569	456.404
BCAS1	Repressed	688.405	785.871	680.438	629.669	540.359	449.678	358.297	289.3	239.281
COL4A5	Repressed	639.133	790.567	700.976	609.697	537.579	413.813	364.515	313.694	288.795
KLF6	Repressed	772.574	397.148	305.979	472.345	544.165	575.644	550.683	544	489.126
RASA4	Repressed	842.8	898.057	697.365	352.741	290.527	257.535	362.372	472.401	472.605
SEMA4D	Repressed	700.089	618.833	604.876	349.911	358.793	397.481	430.965	539.415	589.178
HOXC13	Repressed	695.049	1205.39	612.771	404.321	321.905	310.848	312.595	349.046	371.39
C7orf68	Repressed	863.069	775.851	413.383	412.796	416.478	412.385	412.027	410.97	443.708
ABCD1	Repressed	711.399	736.621	714.567	478.769	413.062	404.372	373.249	382.543	342.646
SYNGAP1	Repressed	801.286	840.26	555.131	400.636	371.454	375.242	357.404	387.54	395.961
GTF2IRD2B	Repressed	658.816	529.755	644.591	533.471	509.253	319.433	398.768	461.083	427.033
MMP16	Repressed	719.841	787.386	717.249	377.063	352.133	374.655	386.622	367.023	330.106
DDIT4	Repressed	967.646	659.315	477.124	389.157	394.888	431.954	413.993	356.131	270.758
DUSP2	Repressed	794.988	1012.92	388.635	258.711	294.413	369.789	392.041	421.168	413.73
KLF9	Repressed	558.848	1080.82	561.958	429.11	366.036	361.493	357.655	334.615	290.989
DLX3	Repressed	452.803	1588.26	687.534	405.973	288.834	229.052	198.453	229.624	253.637
ITPRIPL2	Repressed	1039.5	561.302	246.326	314.021	400.31	458.927	457.84	451.316	375.751
PXMP4	Repressed	747.236	722.857	538.21	424.536	386.785	371.965	361.768	331.965	367.183
GRAMD1A	Repressed	767.661	749.723	586.616	370.417	322.758	347.105	378.304	380.048	334.648
ENC1	Repressed	795.852	616.278	396.81	432.643	461.573	450.867	401.366	363.092	297.307
KIF3C	Repressed	643.141	646.801	552.347	340.539	291.836	314.68	353.512	472.418	573.401
ADRA2C	Repressed	583.03	706.783	768.769	512.597	358.123	329.267	311.839	325.134	289.862
HMCN1	Repressed	637.525	673.187	665.16	445.715	408.22	346.755	340.118	353.397	307.37
BATF	Repressed	366.388	805.932	760.734	600.662	407.48	347.891	308.296	282.464	284.33
EPHA2	Repressed	394.003	1282.52	469.366	389.742	366.598	312.445	299.903	314.059	309.557
TCF7L1	Repressed	803.308	823.316	796.728	519.616	327.578	236.567	190.077	203.73	229.443
ID2	Repressed	1305.9	549	119.497	181.599	301.598	382.439	416.286	406.541	455.22
IFFO2	Repressed	465.348	812.283	865.505	430.4	355.819	291.192	269.095	273.953	321.661
KDM6B	Repressed	700.084	574.108	528.024	445.386	465.96	423.621	341.532	323.959	252.344
CDCA7L	Repressed	497.874	506.086	337.69	236.797	292.209	377.2	466.755	564.617	751.053
MTERFD2	Repressed	716.201	686.485	450.085	404.397	343.598	330.088	347.304	359.438	390.739
ZNF552	Repressed	420.878	854.252	615.949	420.681	340.124	293.454	327.719	365.899	387.895
HDAC5	Repressed	695.512	665.68	577.051	389.179	312.845	299.817	316.187	378.306	391.321
TNRC6B	Repressed	602.177	542.876	429.764	284.76	387.022	405.69	418.565	474.435	430.749
TLE2	Repressed	668.549	612.225	612.783	466.282	379.924	358.861	301.989	308.607	264.174
SSBP2	Repressed	732.616	725.476	610.694	366.35	229.016	236.968	293.397	394.703	383.277
HIST1H4H	Repressed	500.59	519.942	482.319	534.955	455.965	445.236	387.301	351.78	288.003
SH3RF1	Repressed	559.686	622.553	325.568	268.135	407.12	418.693	421.563	415.888	409.112
PLCB4	Repressed	629.491	630.583	546.772	422.206	292.468	279.723	328.731	358.422	357.773
LPCAT4	Repressed	603.096	592.158	408.423	265.015	274.708	331.752	387.37	467.608	483.148
FAM110A	Repressed	376.311	798.426	822.745	468.881	319.868	268.407	243.445	257.155	249.081
CCNG2	Repressed	951.911	443.418	154.272	300.597	377.944	421.15	444.048	381.803	321.568
RNF43	Repressed	1036.81	857.275	89.6535	108.277	222.112	281.658	338.447	395.83	419.531
HS6ST3	Repressed	512.237	543.853	543.271	490.52	375.606	286.713	266.117	360.301	333.517
BMF	Repressed	819.696	968.746	522.78	207.49	212.206	235.737	268.373	252.169	199.65
TRANK1	Repressed	534.778	455.364	279.092	172.787	254.032	363.482	501.975	585.077	537.711
DNAJC6	Repressed	624.878	601.421	471.994	286.8	273.353	308.725	328.895	377.606	397.759
IGSF9	Repressed	627.657	569.521	417.995	257.788	256.096	312.795	345.265	424.562	441.062
KCNC3	Repressed	541.563	699.487	571.519	378.478	355.434	317.211	296.666	261.528	222.527
ABLIM3	Repressed	562.421	614.18	508.097	385.103	324.894	314.101	322.7	327.247	279.144
SQRDL	Repressed	609.751	615.618	506.43	416.366	351.287	290.676	280.327	249.836	309.332
CDK18	Repressed	529.89	592.375	554.302	378.508	308.404	286.77	257.605	303.495	386.715
NR3C1	Repressed	757.199	659.812	204.796	201.87	278.249	319.705	363.735	367.132	412.987
TMEM150A	Repressed	477.846	480.757	471.64	463.291	401.885	408.05	349.973	287.002	215.234
CERK	Repressed	615.698	698.802	625.85	352.749	243.45	241.372	220.149	270.461	266.967
EFNA1	Repressed	923.346	359.3	181.594	294.061	327.958	339.172	385.715	367.622	342.137
KIAA0513	Repressed	571.168	480.588	424.24	275.965	338.708	369.647	359.811	338.571	289.516
DOK4	Repressed	641.888	598.598	477.04	317.776	245.177	232.023	252.851	303.968	361.26
B3GNT1	Repressed	485.401	340.1	240.353	270.233	336.12	382.565	419.509	480.474	460.926
CSRNP1	Repressed	596.844	618.722	341.375	343.373	325.485	294.361	279.382	305.949	290.452
ACAD11	Repressed	564.718	551.97	349.272	308.879	268.01	284.667	316.471	379.997	362.656
PLXNB3	Repressed	547.896	544.982	544.534	325.232	291.663	273.155	275.056	264.565	265.005
CALHM2	Repressed	532.492	315.689	127.344	120.403	239.271	344.888	476.764	574.491	592.987
MB	Repressed	455.855	502.647	422.325	446.583	347.413	316.686	318.107	273.633	206.197
C9orf7	Repressed	543.133	500.19	486.14	337.736	291.52	308.252	282.918	269.226	264.465
SIX5	Repressed	449.921	390.884	245.956	185.693	305.893	406.585	429.316	462.677	405.415
CAMK2N1	Repressed	527.003	559.437	428.327	363.895	292.46	293.445	261.774	252.668	275.557
CMYA5	Repressed	621.112	705.864	474.471	268.397	247.826	222.963	217.283	272.814	218.694
TMTC2	Repressed	533.465	602.936	494.56	336.843	232.06	255.136	236.046	276.879	241.94
GDPD3	Repressed	552.563	519.216	510.54	430.18	303.111	275.639	238.457	203.696	171.34
RAP1GAP	Repressed	446.268	543.214	665.971	496.089	300.82	227.247	193.805	149.953	162.797
AGPAT9	Repressed	442.049	348.338	192.379	232.708	327.965	418.506	432.835	446.494	336.976
FRMD6	Repressed	449.23	356.399	205.635	349.692	404.449	367.092	371.037	313.162	356.707
ID3	Repressed	944.913	307.034	132.28	211.254	291.992	313.352	313.625	317.033	330.485
NUAK1	Repressed	555.695	652.688	355.254	238.65	248.333	267.987	275.683	290.183	277.363
MVP	Repressed	404.373	404.3	425.054	373.761	356.849	347.043	314.035	311.003	222.108
ABCA12	Repressed	572.457	550.389	449.269	243.537	202.564	211.472	274.966	319.721	331.866
PPAP2C	Repressed	548.836	536.791	482.046	365.759	259.641	242.063	241.648	253.85	225.023
PARP9	Repressed	543.129	561.98	491.324	343.482	240.081	224.417	198.388	235.073	254.002
PHF21A	Repressed	442.779	454.091	257.198	207.49	281.44	325.636	340.307	370.779	388.406
CDON	Repressed	472.159	462.785	369.654	288.097	267.053	230.333	275.312	327.901	348.651
PLEKHA5	Repressed	465.132	424.032	273.111	230.195	317.177	341.943	334.222	316.187	305.155
PSD3	Repressed	577.254	629.521	426.81	280.19	180.023	163.575	215.058	271.254	238.736
SYT17	Repressed	493.416	503.57	399.637	269.448	237.776	239.499	272.231	287.732	273.92
ABHD4	Repressed	477.849	437.87	271.463	229.297	293.202	308.311	317.112	309.451	322.2
BCAR3	Repressed	588.274	546.199	265.383	262.513	243.534	235.569	243.785	295.073	271.834
FLJ90757	Repressed	481.17	453.987	307.566	228.961	251.909	272.242	284.589	311.811	348.66
SPIRE2	Repressed	443.382	490.953	511.81	334.648	229.888	219.173	232.238	252.443	224.881
SAMD11	Repressed	645.908	543.21	396.528	224.808	160.018	190.459	230.961	279.13	262.718
FAM107B	Repressed	668.743	688.848	358.96	201.608	158.489	170.011	193.056	230.172	249.632
PRSS22	Repressed	283.707	455.301	623.065	413.963	284.391	240.04	207.469	215.113	178.273
PARP10	Repressed	541.313	523.621	480.319	306.199	236.591	229.965	200.765	202.437	173.752
VIPR1	Repressed	404.345	453.285	388.12	299.766	261.712	293.496	285.463	259.955	236.871
ASAP3	Repressed	492.616	478.98	412.96	321.647	273.577	234.833	215.712	204.203	219.895
KAT2B	Repressed	531.424	533.078	418.332	305.416	224.023	205.794	199.202	198.732	230.689
LHFPL2	Repressed	448.837	442.194	325.815	207.906	249.276	296.6	318.244	278.653	277.651
NR4A1	Repressed	302.342	845.246	185.532	175.461	228.511	247.471	279.014	279.999	281.841
SYDE2	Repressed	507.805	319.303	138.985	218.123	303.277	358.309	356.171	309.243	313.504
KIF1A	Repressed	407.916	390.038	401.32	295.75	280.387	269.555	212.347	257.85	306.4
IGDCC3	Repressed	654.28	511.406	190.858	184.181	219.89	272.786	253.223	285.104	249.445
TP53INP1	Repressed	785.515	653.571	250.902	193.75	183.937	212.304	192.401	173.011	146.624
C7orf60	Repressed	351.276	263.068	146.617	290.321	308.56	369.118	371.568	323.223	329.491
ITPKB	Repressed	421.763	362.622	280.56	199.312	252.856	295.122	296.345	321.334	319.5
SEPP1	Repressed	460.292	469.678	384.693	338.246	251.146	255.634	221.482	173.503	181.135
SIK1	Repressed	368.259	752.863	274.718	193.813	223.028	230.143	216.209	224.371	250.172
ERBB4	Repressed	413.895	436.987	378.232	384.018	379.878	329.79	157.504	69.0267	169.344
UTRN	Repressed	447.751	500.693	502.139	428.599	321.324	213.87	124.021	86.5633	92.228
GLIS2	Repressed	494.772	478.939	315.655	210.156	226.623	231.125	218.339	255.581	272.556
LPHN2	Repressed	393.503	390.248	251.579	171.747	238.448	293.719	305.754	331.837	285.055
LRIG3	Repressed	267.406	236.508	107.201	238.551	363.279	373.178	343.075	345.467	382.649
OBSCN	Repressed	413.989	454.35	459.046	251.93	255.951	216.015	181.48	211.757	201.495
TSPAN9	Repressed	419.619	491.263	390.798	243.108	182.387	195.909	213.513	236.185	267.322
SPG20	Repressed	404.243	303.353	200.817	214.583	268.834	293.598	324.943	304.031	309.482
PDZRN3	Repressed	366.216	386.929	286.107	164.498	244.994	297.797	312.276	304.033	253.49
PNRC1	Repressed	598.018	224.19	188.875	261.203	256.464	308.094	297.079	244.463	228.691
ST8SIA4	Repressed	734.865	602.682	183.821	134.943	165.561	199.384	226.253	196.655	156.951
ING4	Repressed	422.049	385.53	319.595	261.047	201.854	207.243	248.544	282.4	269.257
C9orf109	Repressed	247.585	612.069	267.524	205.864	251.591	291.682	235.498	206.485	259.893
AGFG2	Repressed	365.751	331.491	203.419	175.487	267.451	291.929	290.743	316.829	331.938
FAM20C	Repressed	497.596	485.013	306.476	171.196	182.234	203.559	214.096	245	266.299
SESN1	Repressed	408.46	253.343	165.506	270.052	292.018	281.592	310.234	316.038	269.096
DEDD2	Repressed	366.588	223.303	174.433	226.706	259.525	305.904	319.104	354.216	328.563
GAB1	Repressed	404.131	360.325	194.407	184.038	238.62	262.284	302.403	307.263	288.189
RPS6KA5	Repressed	408.79	410.96	416.917	234.095	190.793	199.935	199.345	227.126	247.297
NFIX	Repressed	473.287	434.33	391.767	262.436	223.174	208.133	185.521	176.928	160.757
CPEB2	Repressed	341.516	287.097	125.898	229.856	304.8	353.157	307.816	280.322	280.886
PTK6	Repressed	423.225	414.232	333.205	222.401	217.771	221.186	232.726	236.191	184.647
ST3GAL5	Repressed	461.662	573.28	479.369	247.713	149.174	138.39	126.936	138.622	163.272
DRAM1	Repressed	472.367	451.097	316.2	210.582	187.183	186.459	212.109	205.447	209.682
PRRT2	Repressed	395.169	405.156	291.043	209.174	194.945	199.655	203.084	240.759	287.55
ARL4A	Repressed	363.213	103.053	94.177	227.298	302.674	344.217	338.572	300.107	290.974
FAM100B	Repressed	386.944	374.552	237.563	168.933	195.511	226.936	236.96	274.044	250.513
ACCN2	Repressed	356.87	385.996	352.565	278.54	223.82	220.273	188.558	174.908	146.961
NPAS3	Repressed	364.59	377.42	329.338	306.743	298.492	180.155	88.1782	148.419	203.606
DDX58	Repressed	435.662	374.619	235.453	160.983	178.023	207.587	224.495	233.171	227.052
NYNRIN	Repressed	479.605	427.565	263.464	149.44	173.405	177.447	186.659	186.609	228.755
LOC113230	Repressed	437.203	364.984	224.143	161.117	180.393	183.382	223.569	235.089	252.935
REL	Repressed	527.78	380.027	81.9491	111.907	200.409	220.068	242.56	224.108	245.977
FANCE	Repressed	248.532	213.739	116.622	137.872	231.99	274.609	298.28	349.526	348.835
AMOT	Repressed	490.407	451.52	294.919	151.725	115.182	124.451	134.04	177.971	261.078
KIAA1217	Repressed	494.89	445.192	329.517	155.651	118.765	130.051	159.724	192.872	173.935
CBX7	Repressed	327.208	340.522	238.831	155.604	163.164	172.8	227.646	268.272	281.929
NT5E	Repressed	388.05	389.812	289.867	237.18	178.116	176.79	175.728	176.697	157.672
COL9A2	Repressed	317.793	307.859	320.454	246.701	218.661	210.528	184.524	188.898	147.267
RAB40B	Repressed	319.92	303.592	335.615	263.075	190.265	205.87	181.955	164.213	157.726
RAB26	Repressed	340.684	393.985	324.938	256.852	194.23	176.935	146.56	149.245	133.371
DYRK1B	Repressed	469.328	383.646	261.983	170.71	150.747	167.542	169.418	187.211	147.91
IFIT1	Repressed	411.294	374.204	254.49	190.775	169.1	178.777	172.328	182.47	149.298
KALRN	Repressed	396.62	386.656	169.346	100.688	134.952	156.562	201.914	245.094	265.221
METTL7A	Repressed	343.984	294.696	234.918	199.223	149.658	123.435	156.272	223.359	316.732
PLCH1	Repressed	392.83	365.091	275.027	117.128	108.797	149.475	199.101	217.044	208.791
ANKRD57	Repressed	181.549	481.766	233.987	219.842	190.659	198.67	197.436	162.045	166.079
CYP4B1	Repressed	312.582	315.029	275.269	249.178	199.601	191.028	175.445	158.591	147.977
HIST2H2BF	Repressed	311.861	380.162	253.548	248.19	230.474	185.487	145.16	135.917	123.34
ORAI3	Repressed	311.663	254.251	175.68	139.787	177.914	211.322	233.137	237.634	231.173
GPR160	Repressed	275.411	326.675	291.527	257.244	189.813	198.358	172.144	142.078	108.195
TENC1	Repressed	369.223	348.331	202.178	113.597	135.078	159.13	186.342	224.514	220.178
CAMK1D	Repressed	244.845	273.124	258.725	272.239	267.048	213.823	143.136	145.744	136.211
PLEKHN1	Repressed	255.64	281.601	268.375	169.295	192.828	213.38	222.27	186.149	136.285
C20orf194	Repressed	289.09	343.37	215.606	139.948	153.255	168.256	185.824	212.814	200.989
CDYL2	Repressed	339.279	332.497	346.918	135.779	134.38	146.352	148.533	162.902	157.101
PVRL4	Repressed	416.581	255.174	101.22	124.417	174.784	205.116	207.879	214.219	197.022
P2RX2	Repressed	247.429	242.983	286.539	247.275	205.438	210.494	170.928	165.458	102.305
CTTNBP2NL	Repressed	345.733	233.997	134.265	167.979	196.695	202.453	181.797	206.987	198.25
DDX60	Repressed	297.229	328.611	267.621	227.542	179.287	169.558	143.246	134.482	114.277
ABTB1	Repressed	289.157	302.008	276.014	188.758	147.777	140.117	153.641	170.708	183.463
CA4	Repressed	275.94	345.949	269.66	164.309	139.02	136.47	172.755	169.864	169.513
MUC1	Repressed	247.659	305.751	320.975	236.862	212.269	163.992	125.75	111.244	117.529
PKP2	Repressed	368.018	343.894	215.528	143.157	119.303	135.519	134.573	182.951	199.072
ZNF704	Repressed	342.085	374.389	297.079	149.339	102.868	111.271	120.021	151.225	162.528
TTC9	Repressed	331.316	290.458	181.832	164.696	186.544	177.091	168.372	151.458	158.765
MEX3B	Repressed	217.979	107.406	106.832	153.025	198.182	244.987	257.23	281.241	239.08
SLC12A6	Repressed	285.143	280.182	195.659	104.277	119.402	146.389	178.568	228.817	267.358
FRMD4A	Repressed	291.115	287.349	161.609	118.933	151.883	180.276	181.227	208.328	202.065
SALL2	Repressed	328.374	212.824	93.5923	110.116	151.928	152.56	187.848	245.179	295.267
ATP8A1	Repressed	352.725	378.466	311.209	195.272	136.455	113.245	98.7673	91.7072	96.8568
OAS1	Repressed	332.871	330.967	255.762	191.54	129.67	123.73	114.805	143.055	144.743
SUV420H2	Repressed	291.643	232.767	133.202	124.318	149.477	170.047	188.087	230.707	242.393
RIPK4	Repressed	223.835	476.979	282.406	156.73	147.594	123.274	124.503	107.46	118.091
ILDR1	Repressed	299.062	279.439	150.906	109.649	132.691	150.696	191.073	209.417	232.369
TMEM45B	Repressed	313.079	349.627	268.2	181.725	113.201	122.114	115.988	145.292	137.678
DLL1	Repressed	197.41	463.029	211.778	119.727	128.85	139.515	121.854	170.382	178.963
RELL1	Repressed	324.599	295.636	126.305	127.248	139.951	156.616	163.421	176.413	190.689
IFIH1	Repressed	313.39	261.971	202.757	161.694	152.193	149.864	140.932	157.746	158.857
TSPAN1	Repressed	216.25	250.605	223.233	216.803	177.927	172.671	174.858	145.679	112.677
SH2D4A	Repressed	274.923	272.966	154.745	113.527	142.755	168.545	169.61	189.437	186.975
ZNF467	Repressed	444.107	317.222	213.05	139.04	109.374	120.459	99.8303	115.518	111.497
SOCS2	Repressed	270.076	210.028	149.953	137.525	130.439	177.39	196.443	188.99	204.404
TMEM125	Repressed	265.824	229.857	154.907	112.812	124.432	153.419	188.777	200.431	219.52
CCDC159	Repressed	270.838	274.226	234.343	203.021	165.497	142.068	126.618	122.239	110.949
KSR2	Repressed	291.472	234.41	223.513	155.244	130.918	105.1	124.476	185.83	190.916
SMPD1	Repressed	235.81	217.469	225.415	184.46	172.988	174.491	146.632	145.033	125.048
NCOA7	Repressed	242.24	258.515	112.249	120.104	153.593	163.256	179.312	184.316	202.909
CLDN9	Repressed	352.675	350.448	242.944	129.745	108.33	114.825	110.709	105.898	93.4702
LOC283070	Repressed	229.884	242.034	222.384	213.249	215.822	157.686	109.617	117.882	95.8211
ZNF620	Repressed	239.01	186.545	115.343	154.645	152.575	164.289	176.929	185.22	226.385
SP4	Repressed	179.317	138.397	83.048	153.263	201.349	200.993	201.311	217.431	224.37
ANKRD56	Repressed	340.397	309.736	124.454	112.028	108.686	128.478	146.185	168.54	160.678
C18orf1	Repressed	195.399	190.495	137.714	224.15	265.571	208.49	140.899	125.627	102.268
MAP1B	Repressed	327.265	263.527	199.391	152.974	151.922	137.031	121.411	127.47	103.865
GYG2	Repressed	254.996	250.831	215.184	150.842	120.138	119.468	130.424	154.501	184.187
EGLN3	Repressed	266.705	190.051	94.5437	126.575	159.275	166.79	199.742	179.565	185.766
LOC646471	Repressed	232.489	247.86	217.276	191.428	152.894	152.245	134.602	129.471	108.083
TCEA3	Repressed	262.244	281.638	229.827	182.216	144.805	110.991	114.352	109.093	121.435
NMNAT2	Repressed	230.391	276.259	230.821	188.012	153.156	120.757	100.829	106.846	137.043
FUT9	Repressed	258.312	273.586	176.835	100.566	118.209	160.158	144.292	153.241	157.24
MFAP3L	Repressed	223.786	224.787	171.235	185.883	192.623	160.063	141.355	121.515	120.835
FER1L4	Repressed	211.309	222.745	231.011	172.265	170.058	140.679	142.473	137.381	111.836
PNPLA7	Repressed	225.68	261.957	285.094	192.067	151.87	135.342	108.013	110.114	68.9212
HIST1H2BC	Repressed	214.074	278.911	208.728	174.079	148.632	165.793	126.973	109.856	100.32
FZD8	Repressed	228.693	93.615	106.148	154.73	173.646	208.425	199.411	182.741	171.416
TRIB2	Repressed	255.939	193.327	115.023	118.765	155.879	175.287	184.404	160.946	127.859
STAG3L3	Repressed	222.605	174.337	201.641	154.397	192.321	97.3417	137.851	188.108	112.671
ARHGAP18	Repressed	283.817	274.491	186.157	124.769	97.0609	96.903	121.392	126.805	158.014
AHRR	Repressed	195.236	222.783	455.736	238.679	113.882	80.3176	54.0699	49.3075	53.5565
KNDC1	Repressed	246.121	239.925	217.856	137.464	117.062	114.44	107.767	137.718	139.88
NCRNA00174	Repressed	221.624	250.057	205.329	132.397	140.183	129.861	109.766	143.97	118.056
CSTA	Repressed	217.216	205.617	184.154	183.695	153.97	149.389	139.066	121.105	86.9881
ST7L	Repressed	313.318	287.532	166.653	114.015	104.129	105.314	108.305	117.525	113.915
EPB41L4A	Repressed	211.55	232.146	213.495	165.711	125.561	122.309	119.713	114.507	118.205
ACHE	Repressed	300.846	303.955	263.502	150.683	116.398	117.155	77.3175	63.0595	29.2894
C19orf66	Repressed	239.593	250.805	206.581	155.2	130.41	114.927	106.963	103.285	114.18
SYNPO	Repressed	235.139	238.143	251.365	176.683	147.329	114.765	97.5037	81.6436	76.1155
RIMS3	Repressed	200.116	204.4	226.784	162.235	140.098	115.11	94.7682	121.679	147.938
MAP3K12	Repressed	252.054	272.674	163.353	97.3475	97.3699	113.715	129.231	139.009	148.291
PLK3	Repressed	108.316	257.674	211.759	179.842	190.181	148.415	117.305	104.405	94.3127
AKAP12	Repressed	248.786	208.607	110.47	82.5758	129.041	140.237	166.136	171.457	136.511
CPAMD8	Repressed	229.025	245.415	225.388	164.78	128.018	107.382	93.96	95.4426	89.7599
GPR139	Repressed	178.927	85.0819	75.7164	139.431	192.224	190.539	183.452	161.072	158.878
STON1	Repressed	373.523	321.193	130.394	60.6747	45.967	73.4721	101.789	137.374	119.753
SRCIN1	Repressed	225.358	244.129	225.723	132.288	108.909	98.1491	104.164	98.7887	113.692
C11orf95	Repressed	247.659	240.247	163.521	105.036	110.763	129.761	123.662	116.959	112.581
TDRD5	Repressed	222.946	208.906	147.07	75.952	88.0186	86.8222	135.286	178.274	205.697
FZD2	Repressed	239.063	168.421	99.7573	99.9891	135.057	162.285	164.887	163.584	114.471
RHOV	Repressed	199.026	205.741	160.475	169.853	161.188	123.557	108.492	107.132	109.194
GHR	Repressed	231.319	231.443	213.604	141.011	100.507	110.6	114.793	107.096	83.9859
KLHL24	Repressed	279.707	243.921	104.246	86.7859	109.3	130.504	137.704	134.398	104.554
CLSTN3	Repressed	229.72	211.963	184.017	136.282	110.357	85.5566	98.2346	117.727	156.019
MEIS2	Repressed	168.121	170.178	82.7657	59.6849	123.961	172.497	188.409	178.681	170.499
INPP5J	Repressed	309.819	322.731	250.82	143.906	80.1031	58.4065	52.9645	43.4402	51.232
NFKBIZ	Repressed	213.528	76.0721	97.2903	138.032	147.359	155.199	168.734	163.132	151.52
PLEKHH2	Repressed	191.877	218.849	170.956	153.885	151.429	146.841	120.154	89.6819	62.7636
GRB14	Repressed	244.092	229.22	184.054	133.855	97.5049	90.5593	106.369	107.742	112.823
LOC388692	Repressed	194.017	186.069	127.678	84.5951	100.031	107.981	137.909	183.213	179.213
SECTM1	Repressed	206.867	236.518	210.214	153.037	111.44	104.974	88.961	97.6975	80.741
PHLDB2	Repressed	200.805	178.741	119.566	62.9631	93.6201	131.951	155.253	174.318	171.846
HSPC157	Repressed	175.907	144.152	86.1098	119.054	123.14	129.186	154.417	173.927	181.561
TMEM63C	Repressed	193.862	205.629	185.106	140.262	118.648	120.627	121.365	111.876	89.2179
PTK2B	Repressed	234.047	243.816	210.039	119.891	85.3912	73.7842	81.5384	104.231	131.669
RORC	Repressed	241.265	234.904	114.926	66.4332	82.0479	115.879	132.564	137.517	134.002
LIMA1	Repressed	253.52	255.519	201.842	159.644	106.883	75.0277	60.9259	60.2274	81.9386
RWDD2A	Repressed	194.387	117.023	97.082	128.627	142.186	149.287	142.752	137.236	139.385
FAM171B	Repressed	307.776	279.591	153.161	87.7713	83.0157	88.9163	83.6549	83.3678	79.0541
WDSUB1	Repressed	210.687	196.97	136.762	93.178	95.8884	110.876	127.715	135.04	137.552
FAM46B	Repressed	207.644	120.274	39.2757	114.819	148.373	151.273	160.172	157.184	140.013
ENPP5	Repressed	149.433	119.823	66.4832	83.9429	134.417	149.438	176.45	167.191	189.455
OSBPL6	Repressed	130.265	115.99	107.996	65.11	84.0533	140.475	176.369	203.631	209.432
C20orf151	Repressed	292.4	234.062	164.718	88.5222	77.9303	83.3961	87.5626	96.6901	101.383
PARD3B	Repressed	178.206	196.28	144.904	124.999	146.47	122.353	104.701	96.6929	104.419
TECPR1	Repressed	183.934	186.05	193.376	116.622	111.239	116.934	118.148	109.487	81.7488
DENND3	Repressed	163.421	221.604	231.939	135.916	96.556	81.1139	69.8775	88.6777	126.72
OAS2	Repressed	216.527	200.911	165.378	156.545	107.913	97.3296	93.6514	94.9334	81.3467
HIST1H3E	Repressed	213.442	138.671	102.555	133.346	131.575	130.296	130.956	121.656	110.564
ADAM22	Repressed	180.29	177.204	182.337	119.679	94.4321	86.259	102.253	119.941	144.163
ANKRD34B	Repressed	198.675	194.09	134.237	100.833	103.436	114.672	117.549	114.558	123.996
RGAG4	Repressed	204.631	181.555	147.809	134.75	114.323	100.537	100.815	103.674	109.567
SERTAD4	Repressed	144.809	115.752	63.1928	75.5921	117.331	153.565	151.474	176.762	197.752
HIST1H2BG	Repressed	220.538	247.965	131.649	110.479	121.223	105.124	98.0178	72.4178	74.5036
GABBR1	Repressed	163.273	163.715	156.208	126.778	131.07	114.236	112.841	118.811	90.9454
ZDHHC11	Repressed	193.271	197.229	160.192	115.561	106.52	92.2295	99.1865	105.516	104.936
SIX1	Repressed	162.39	88.9798	78.6172	117.701	139.738	150.394	140.47	139.968	140.284
NAT6	Repressed	156.489	143.333	106.036	77.0715	113.866	123.542	126.12	141.975	158.059
LRP1	Repressed	201.503	194.405	195.914	116.164	104.53	85.6482	73.5377	85.795	85.9544
GOLT1A	Repressed	187.004	180.32	163.376	142.071	101.529	88.3474	80.2375	98.4661	93.7548
ARID3A	Repressed	181.321	189.615	131.839	69.9787	84.9334	106.842	125.519	119.538	118.571
C1orf115	Repressed	199.922	181.453	131.527	112.103	108.801	91.02	96.9901	99.2983	105.849
PTCH1	Repressed	179.147	181.984	42.3563	64.7332	119.323	151.056	136.694	134.567	96.8311
TNFAIP2	Repressed	105.841	218.27	211.123	130.679	87.644	85.705	89.1951	86.7864	89.1079
P2RY6	Repressed	171.717	178.825	170.917	125.931	119.904	116.003	79.2613	74.7877	65.2455
C1orf203	Repressed	191.376	136.377	99.4241	93.46	101.765	102.835	122.124	126.918	125.884
BTG2	Repressed	463.753	140.425	73.404	75.9112	68.4915	71.0472	71.2326	68.5963	66.7552
EFCAB4B	Repressed	198.492	204.003	159.176	118.062	87.3668	82.9936	79.0385	84.4873	85.3262
C10orf140	Repressed	151.042	66.3463	52.7051	89.5407	123.526	131.288	148.362	160.333	173.91
GRAMD3	Repressed	181.454	144.179	50.8202	71.9863	111.109	123.774	130.391	131.327	150.079
PLLP	Repressed	222.13	212.48	147.696	75.2329	53.1896	71.7709	83.1292	113.782	110.292
C5orf41	Repressed	256.228	223.708	51.6815	67.2051	80.4167	88.2252	108.423	113.922	95.6557
PHLDB3	Repressed	210.563	172.894	104.311	80.5034	97.9837	100.082	103.245	117.633	98.1465
IFI27	Repressed	134.91	142.051	124.049	124.22	118.248	112.877	107.29	123.475	96.5853
SLC12A5	Repressed	183.231	172.546	165.61	103.782	91.1458	97.2123	89.1468	87.7537	93.0098
ANKRD34A	Repressed	196.054	136.273	107.232	91.2603	104.775	112.115	108.338	103.359	117.22
C2orf55	Repressed	220.143	180.701	118.472	61.227	59.773	79.4968	100.371	134.05	122.238
FN3K	Repressed	172.239	154.551	149.586	127.091	97.6585	86.6493	85.862	101.84	94.4608
LRP2	Repressed	250.691	267.635	193.536	99.944	65.5348	57.933	44.4912	46.9822	35.0412
LYN	Repressed	224.389	245.441	146.945	70.8075	62.4271	62.9636	71.8274	78.7871	90.7303
PACSIN1	Repressed	203.885	191.679	153.183	112.566	89.3559	64.2001	58.8686	70.3514	96.7216
ARHGEF37	Repressed	307.489	281.865	103.757	40.1236	40.7921	48.5785	61.8637	80.8694	68.9617
DISP1	Repressed	127.23	113.205	62.457	96.8767	114.834	131.534	122.341	123.103	134.054
PIK3IP1	Repressed	232.218	172.761	54.6061	69.4385	92.8481	107.095	104.374	100.267	84.4311
GOLGA6L5	Repressed	153.799	153.477	146.318	116.744	100.397	95.3218	95.6807	83.0411	71.685
SYNGR3	Repressed	150.898	175.628	161.984	126.142	100.116	79.9181	62.5068	70.0932	79.5657
PRX	Repressed	178.388	146.599	118.068	83.092	80.3267	87.1816	96.708	106.622	107.318
EPHX2	Repressed	139.226	160.549	139.079	113.104	109.386	92.5258	92.9877	76.0938	76.5322
FA2H	Repressed	173.079	178.445	151.812	78.0518	55.6267	51.9108	65.7798	88.4558	147.515
CASP9	Repressed	144.544	151.3	143.012	115.816	91.811	75.6844	71.4536	92.4767	104.165
DIXDC1	Repressed	132.958	149.068	92.06	50.4228	69.7719	104.891	127.002	129.925	130.208
KIF13B	Repressed	142.602	146.327	204.872	149.52	99.0931	58.8218	49.0189	58.9262	75.7535
ZNF596	Repressed	149.432	126.995	116.731	104.316	93.0943	108.218	92.0672	90.7709	94.1984
FRAT1	Repressed	180.082	78.1888	45.6332	76.5095	96.141	118.434	126.427	131.804	122.193
PLCD1	Repressed	165.681	154.848	114.489	74.4097	75.4795	75.4176	83.0468	102.718	123.37
C15orf38	Repressed	112.597	136.69	138.635	117.709	119.225	101.76	95.853	85.8188	57.9886
MRC2	Repressed	153.838	148.692	129.349	88.4533	68.8854	77.9718	84.2738	98.5273	107.605
IRF6	Repressed	201.508	161.322	97.3476	72.5313	75.9605	87.9619	89.1499	83.6977	86.9452
FAM113B	Repressed	164.985	149.915	99.7229	66.3992	50.164	73.6079	108.812	123.874	118.712
PRR5-ARHGAP8	Repressed	135.598	170.941	149.133	94.0315	107.013	95.2429	74.1049	70.4577	59.4755
FOXP2	Repressed	149.087	119.553	147.829	98.0789	62.8153	62.0729	78.1174	114.88	122.785
SSPO	Repressed	143.421	159.16	208.748	113.968	101.708	93.1771	59.3307	45.5482	29.6965
PAQR5	Repressed	184.767	187.573	169.491	128.833	88.0964	68.9616	46.8225	34.861	45.0496
RND3	Repressed	150.918	138.959	107.806	126.262	92.0927	98.2686	90.4157	72.7679	73.5999
PLEKHM3	Repressed	156.419	179.068	111.984	68.074	94.0949	86.9212	84.1669	90.4305	77.5813
FOXO4	Repressed	160.277	162.887	136.855	102.022	79.4757	63.3874	64.7612	80.9736	88.2497
DOCK10	Repressed	116.224	106.131	86.6819	48.2109	60.3955	102.547	133.873	139.853	142.666
GRB7	Repressed	225.616	203.555	60.4139	49.9438	56.8311	68.7061	81.9983	93.125	94.3667
SLITRK6	Repressed	148.086	75.6062	24.944	62.4478	95.6051	129.108	149.376	122.993	125.696
CAB39L	Repressed	182.365	166.488	109.156	82.6484	73.7333	70.569	81.8461	89.2291	66.9125
ANKS1B	Repressed	126.045	140.407	137.257	104.606	113.491	83.811	76.1279	38.2097	97.9594
DACH1	Repressed	149.276	149.088	129.007	72.0918	32.7195	65.2664	96.8007	113.022	100.248
PPP1R9A	Repressed	136.208	136.907	134.828	90.1598	87.4839	71.1533	62.2595	83.7464	97.2727
PUS10	Repressed	156.931	147.03	82.8455	76.9456	80.3535	82.5255	96.1033	87.5964	89.6769
GATA6	Repressed	123.684	190.091	146.23	87.0264	61.9766	69.1292	62.844	74.2089	79.1808
RFX3	Repressed	133.411	118.72	91.7203	53.3067	84.9378	92.1225	100.697	111.575	106.776
NACC2	Repressed	148.687	115.291	116.107	79.5781	110.619	91.7201	81.5389	71.5351	74.3127
DBP	Repressed	208.059	156.643	66.1868	45.6309	66.9679	84.256	88.7718	94.4678	78.1093
COL23A1	Repressed	119.852	115.616	125.191	91.2263	91.5618	101.732	93.8348	84.0551	60.2712
LOC729375	Repressed	132.334	153.625	110	92.3858	74.2384	80.9261	83.3707	83.1809	72.1442
AFF2	Repressed	179.144	177.24	160.768	140.037	85.6219	59.437	42.3105	19.5347	15.6634
KCNJ3	Repressed	162.022	171.31	71.1938	36.8466	57.6661	89.4284	101.564	98.2089	85.1487
ZNF333	Repressed	122.791	111.233	117.656	101.164	100.069	82.4635	86.41	83.9675	60.2805
ACBD4	Repressed	140.297	160.166	123.215	78.0931	64.6557	70.2661	72.2153	72.4413	83.4646
FAM110B	Repressed	166.416	122.578	73.1204	84.0778	96.7475	89.4057	84.5098	77.2373	67.1634
FAM43A	Repressed	120.57	226.25	165.454	91.9799	56.3664	55.0302	46.5283	46.2948	52.2834
CA5B	Repressed	155.23	142.685	111.167	83.1595	72.1984	73.1638	75.5679	74.4838	71.6915
DENND1C	Repressed	123.809	146.731	128.956	86.4425	77.6682	73.7344	61.3613	70.1234	82.7392
RILPL2	Repressed	157.462	172.722	107.866	78.4296	63.5992	57.3929	69.2452	67.8328	74.8747
RASGEF1B	Repressed	103.074	74.3398	34.2198	42.2272	69.964	101.922	122.433	150.012	148.255
ID1	Repressed	315.211	126.76	32.0474	40.0107	55.305	68.0659	63.9453	68.8465	76.0151
TGFB3	Repressed	281.57	254.539	94.4458	33.4187	33.4946	36.0876	41.1351	41.798	28.9434
GYLTL1B	Repressed	135.647	129.309	118.315	78.99	65.0204	76.5734	69.7396	87.24	79.1725
C2orf15	Repressed	131.299	114.621	65.9815	62.6674	68.8003	67.1452	90.9521	106.78	131.533
CECR2	Repressed	141.451	174.957	85.8016	45.2853	59.8799	77.9356	80.0444	87.0127	85.2174
FERMT1	Repressed	140.211	159.014	117.146	71.0919	67.2101	77.7665	70.1923	70.6648	61.4934
LNX1	Repressed	173.574	162.302	78.1289	35.9324	52.4651	68.4777	87.0447	85.3633	90.1514
NUAK2	Repressed	121.854	168.856	63.147	53.0101	67.1641	78.7048	74.3587	98.5495	106.834
SMAD6	Repressed	188.79	165.862	63.5105	28.7436	55.3081	77.9955	80.7304	85.3948	84.6609
EPOR	Repressed	163.732	160.281	109.504	71.089	63.3003	61.894	61.2487	72.5604	57.9258
FAM78A	Repressed	172.165	148.678	75.416	50.0364	58.9912	70.8101	69.609	88.6534	79.5229
TET1	Repressed	118.915	112.565	69.7515	47.0891	80.588	92.1736	87.0498	92.9935	101.016
SLC17A5	Repressed	138.487	128.954	81.0934	71.1096	70.1608	70.1561	73.0827	75.4615	78.165
SEMA7A	Repressed	112.68	105.254	59.6926	66.868	79.0697	97.1745	87.4578	89.5578	87.4071
LOC100130581	Repressed	120.545	126.767	93.8243	76.2157	63.9918	58.2007	72.9912	82.245	90.3334
C5orf62	Repressed	130.267	95.3846	49.7999	55.4918	64.7095	72.8128	89.2556	95.3904	129.741
RBKS	Repressed	108.927	108.687	92.9634	104.073	81.9929	78.5172	73.5968	68.7355	61.7008
HIST1H3H	Repressed	131.815	112.224	105.426	90.4277	84.5154	73.0672	57.5504	64.4423	57.0682
GPR81	Repressed	213.782	144.947	42.3848	29.0333	53	63.659	72.8668	79.6409	71.562
SOX9	Repressed	101.769	242.602	98.5739	81.9373	53.1585	50.6581	44.9801	52.0054	39.0416
PAK6	Repressed	123.342	127.212	86.6994	51.7976	53.4036	65.642	68.5618	87.1134	88.6599
CDK6	Repressed	181.757	174.504	111.249	53.563	39.3915	47.3498	50.1313	46.9908	39.5876
ICAM5	Repressed	119.971	92.0958	71.715	47.1815	61.2914	73.1533	93.4545	105.443	78.0182
NEIL1	Repressed	117.853	112.621	104.274	72.8443	68.6776	59.5095	63.8151	75.1155	62.1549
FAAH2	Repressed	113.954	108.82	87.9007	78.161	64.5594	56.5075	65.0021	67.0746	90.5343
LOC344595	Repressed	106.521	91.4437	49.7191	51.2529	61.5667	62.8498	84.7929	106.073	116.074
TCP11L2	Repressed	139.536	133.69	75.0306	57.726	63.4289	65.7886	72.1839	67.2977	55.0374
CDH18	Repressed	123.292	132.173	119.968	97.227	29.925	26.4286	41.6323	72.4793	85.5191
EXPH5	Repressed	117.395	100.177	58.087	59.4802	68.6161	77.414	85.1753	84.8123	72.9104
CORO2A	Repressed	136.554	168.288	147.964	85.0581	53.372	35.0448	29.5318	32.4626	34.272
SLC1A3	Repressed	127.126	120.188	90.1464	78.6697	64.9611	62.5395	52.045	56.067	69.5924
AKAP5	Repressed	120.957	72.1442	37.7324	74.6574	88.5844	85.5193	77.2337	70.2461	89.1982
DTX4	Repressed	125.662	110.262	64.4994	43.9097	62.9149	73.4423	66.59	71.0153	79.9056
PGM2L1	Repressed	103.071	78.0449	47.1672	57.0373	68.6014	71.2138	86.9393	91.9435	85.5605
FLJ45244	Repressed	104.346	101.208	71.245	59.4981	50.1483	64.5194	69.0511	89.6144	79.0974
IL17RE	Repressed	119.596	123.008	110.696	60.9753	40.9969	39.2489	53.6754	69.9867	69.975
ZNF469	Repressed	106.574	106.007	122.664	69.8793	54.246	59.5719	48.6634	56.467	54.023
C17orf59	Repressed	106.557	52.1616	67.8456	70.0307	79.6287	83.1112	80.8451	72.4154	64.4489
KIFC3	Repressed	201.367	167.105	117.221	39.859	21.4533	27.4776	31.6214	36.3455	32.9604
ARHGEF6	Repressed	123.226	137.175	111.537	75.0755	64.643	47.423	36.198	37.436	40.3046
PALM3	Repressed	150.347	140.471	83.3875	57.7973	50.8124	46.2912	44.4754	44.8783	51.9917
SESN3	Repressed	128.321	81.1135	74.7198	76.9181	70.1112	67.8159	63.3221	55.8948	46.5746
IL1R1	Repressed	205.851	181.531	87.5518	41.1184	31.3279	28.7885	29.6775	34.7563	23.0202
C22orf36	Repressed	122.023	107.095	102.764	66.544	56.4658	50.8282	46.7746	53.6014	56.3666
CCDC28A	Repressed	114.765	92.5298	62.2811	53.2334	58.2242	69.1638	72.8077	67.2075	71.0714
WNT2B	Repressed	199.253	184.167	93.2491	34.1734	24.459	22.5343	29.3521	34.4306	31.3307
RAB3A	Repressed	111.058	69.1976	42.1362	56.801	82.4948	80.073	70.0259	73.2831	61.6324
RIMKLA	Repressed	107.197	87.5568	47.847	44.1553	57.5619	60.6007	78.6285	76.1221	83.6759
RNF207	Repressed	107.98	130.14	109.31	67.3914	57.2726	52.0985	42.5929	43.0052	32.3177
ADAMTSL3	Repressed	109.225	101.6	87.7644	87.8807	60.6328	54.6746	48.8463	43.7556	42.8815
CDKN2B	Repressed	104.92	88.3894	45.6879	45.0225	55.822	79.1375	83.2577	72.3896	52.393
KAZALD1	Repressed	103.921	85.9514	54.7996	38.8245	45.9867	56.3674	72.2043	84.7703	79.09
KIAA1539	Repressed	114.412	109.09	59.7729	39.3569	51.2291	65.8733	60.8547	59.0271	60.5827
ELFN2	Repressed	104.08	91.2313	88.0063	56.9912	54.3832	56.0331	50.8151	54.7261	59.6446
C6orf165	Repressed	140.698	124.776	74.3761	50.7052	41.374	42.9877	45.9174	44.6664	46.6476
TGFB2	Repressed	108.955	109.161	48.8698	50.461	61.2708	69.1331	64.2133	51.7982	47.03
NFATC4	Repressed	127.807	115.628	74.0886	37.3179	35.5818	29.795	30.8093	65.2352	91.046
SPDYE6	Repressed	103.435	84.7518	70.331	54.5124	60.889	60.452	49.5862	68.1238	49.4757
FAM105A	Repressed	123.976	114.749	69.6586	61.3047	58.1564	51.261	40.7603	38.7164	42.6736
USP2	Repressed	123.886	97.3961	46.4205	39.7739	45.2676	52.2363	56.9346	65.1171	55.6028
PARP8	Repressed	104.444	111.956	61.5125	25.2044	38.7877	43.8677	54.7185	61.1949	75.2676
FMNL1	Repressed	101.061	105.049	80.001	49.2692	40.8105	34.7438	41.5847	40.9869	55.5108
RAB27B	Repressed	126.069	130.939	69.1875	31.4887	28.0844	42.127	41.9833	38.6088	38.3168
RUNDC3B	Repressed	117.067	110.277	58.9295	28.4279	32.14	47.7325	54.6077	52.1393	39.033
DMRTA1	Repressed	127.644	59.0375	50.8704	54.7994	50.7067	57.4097	45.0395	45.3979	43.4609
FAM115C	Repressed	103.149	95.0264	66.2745	40.3576	35.0952	41.5953	47.0317	51.1684	45.8571
SLIT2	Repressed	118.328	113.41	106.211	56.7982	28.7693	20.508	18.4624	32.5397	28.285
BBC3	Repressed	130.126	53.9449	33.0347	33.062	45.5288	61.5249	55.2102	59.2294	51.4969
TFPI	Repressed	106.364	99.282	66.4397	44.9677	34.3528	36.0435	41.1678	39.9736	45.9543
RNF144B	Repressed	111.403	86.1374	53.9615	52.0599	36.2411	35.4826	39.1182	32.9931	40.8626
GRHL3	Repressed	161.297	124.063	28.2808	28.0558	26.1687	27.0544	26.0728	19.9653	12.8802
SP6	Repressed	123.334	73.5768	41.8757	32.7922	35.7749	36.609	32.7884	33.8322	38.676
TBX3	Repressed	135.733	68.8179	31.509	27.6611	34.2554	32.181	33.0022	27.5845	28.2658
GREB1	Induced	21443.5	23885.9	73308.4	105823	143478	146879	149993	161120	149986
TMEM64	Induced	20499.6	25352.7	42699	85358.7	107770	127393	133819	112682	105489
CTSD	Induced	28489.5	33386	57914.5	67550.4	80354.8	94286.1	98804.9	119221	130062
SCD	Induced	47288	47484.6	50473.2	59787.1	76956.3	84661.8	94530.2	109319	112068
SULF2	Induced	47654.3	50220.2	60837.6	69220.9	82146.7	81985.2	85841.7	89053.6	86460.3
IGFBP4	Induced	16743.9	35587.6	74049.2	93333.5	89542.1	86735.8	81460.4	81455.6	76742.9
CELSR2	Induced	18016.2	22806.2	58344.9	68272.5	93040.5	87639.1	77570.2	74906	74721.1
TUBA1B	Induced	42046.6	43389.7	45810.8	50559.2	52267	55735.6	58749.3	65072.9	77366.3
FLNB	Induced	26757.9	27877.1	45246.6	48610.4	58410	54254.1	53660.6	51799	50079.6
TUBB	Induced	28690.8	28125.3	29346.9	31165.2	34578.4	37097.7	38312.6	41737.2	49407.7
FKBP4	Induced	16476.6	21535.9	30085.4	36625.8	38545.5	37718.8	38767.6	38476.1	38251.5
NPY1R	Induced	5998.35	7796.29	14767.5	31081.4	42376.6	47885.2	50387.6	44490.9	50125.9
SDK2	Induced	1921.55	2149.73	2492.47	25562.5	62439.2	64697.3	49432	43326.1	36422.7
PGR	Induced	6201.41	9262.56	26361.3	36494	41398.7	38735.9	39690.1	39129.6	39881.2
HSPB1	Induced	22165.3	23015.6	26099.6	25773.6	28218.1	30319.8	33052.3	36251	36666.6
RAB31	Induced	4637.45	4717.48	13023.5	25391.6	35728.5	41228.5	46565.4	43521.7	39981.5
TUBB2C	Induced	18976.6	19448.2	23529.8	25584.3	27688.7	29006.3	30832.3	33602.6	32609.7
MYOF	Induced	14104.9	15008.3	19966.5	23329.9	30079.8	29194.9	31853.3	33318.5	33706.9
KPNA2	Induced	17523.9	16775.3	20994.8	27125.5	30075.1	29541.3	30670	30577.5	25872
DHCR7	Induced	9956.39	14660.8	23758.7	26940.6	29583.9	29924.6	30383.8	32585.1	31173.9
TFF1	Induced	7782.32	9172	16204.9	21096	23063.5	23586.6	31205.8	35659.5	44242.4
MCM7	Induced	14913.8	14503	15124.9	17501.5	20596.4	23042.1	27217.1	32203.5	33477.2
TMEM164	Induced	6167.91	6716.82	11784.2	18979.5	27418.6	30717.9	31991.5	32409.9	29715.7
TPD52L1	Induced	6135.27	7163.14	15270	22560.6	25706.4	28274.6	29838.6	27600.8	25885.1
RAPGEFL1	Induced	2809.76	6116.59	22783.1	27510.3	24610.8	20001.4	19029.6	20829.9	21952.1
ELOVL2	Induced	3526.15	4316.37	12272.2	22459.1	24531	23681.8	21707.5	21061.3	22636.1
SEMA3C	Induced	9925.48	9977.88	10856.4	14617	19325.1	20485.2	22603.9	22238.8	20045.8
SYTL5	Induced	1808.72	1793.89	2304.02	9870.75	20956.8	24874.4	28945.3	27255.3	28590
AMFR	Induced	8337.22	10994.5	15034	17314.2	16593.8	16529.9	17808.1	21028.1	21483.4
COL12A1	Induced	5612	6548.68	8605.11	11753.2	18814.8	20651.9	21952.4	23469.7	23975.7
MCM4	Induced	8695.63	8402.14	8639.47	10824.6	14353.6	16266.8	17969.6	18727.5	20250.1
DLG5	Induced	7958.03	7812.12	14034.3	15804.9	17025	14842.3	13598.5	13601.7	15552.4
MKI67	Induced	12162.1	11845.2	11881.7	12129.2	14931	12902.9	13274.8	14772.6	15320
CDV3	Induced	10501.2	9916.23	8935.69	10844.5	13566.2	14277.3	15591.2	14919.7	18585.8
PRSS23	Induced	1885.13	4417.97	9925.52	15519.1	16705	17195.8	17239	16584.1	17378.1
ATAD2	Induced	9158.54	8741.9	8042.13	10591	13683.9	14134.6	14955.9	16082.1	21188.7
AGR2	Induced	6668.6	6265.88	6552.85	8549.85	11349.2	13255.1	16475	20440.9	24949.5
KRT13	Induced	398.033	2040.35	8015.57	12386.9	15423.8	15409.1	18082.9	19928.2	18107.7
MYBL2	Induced	9587.13	9417.99	10276.5	10439.3	11289.3	11594.5	12683	15532.9	18874.7
CALCR	Induced	3256.18	3104.67	4692.71	10561.7	15802.2	18113.7	19874.3	18115.1	16066.6
MYBL1	Induced	2136	3946.16	11992.1	13409	14882.7	14165.5	14800.2	14934.3	17190.7
BRIP1	Induced	7935.12	7323.89	8797.3	7597.66	9707.82	12207.2	14208.1	17769.1	21755
TOP2A	Induced	10397.3	10065.5	9198.13	9989.72	11393.7	11432.5	11978.6	12686	14004.6
MCM3	Induced	6880.89	7014.04	6618.58	8264.03	10463.4	11780.1	13965.4	15966.8	17941.9
TPBG	Induced	5608.4	6991.63	9831.38	11355.8	12378.8	13151.1	12987.4	13030.4	12898.3
PDZK1	Induced	1114.69	1603.71	4794.88	8558.38	11217.7	10415	14131.1	16933.7	23987.5
ADCY1	Induced	5623.86	6053.66	7886.03	9165.79	12173.3	12458.2	12084.3	13499.9	13346.1
LAPTM4A	Induced	6189.55	7148.21	8072.67	9491.17	9577.25	11262.5	10943.3	10919.4	12413.2
PKIB	Induced	1837	2017.18	4196.63	8259.12	10890.2	12724.4	13922.6	12530	14782.9
MCM6	Induced	4468.4	4473	4754.35	6719.81	9520.83	10899.2	12460.9	12704.5	13581.8
RRM2	Induced	6486.99	7039.84	6957.68	7759.71	8395.94	8833.03	9017.12	9663.84	14654.5
TUBA1A	Induced	6101.19	7017.3	7819.22	8467.1	8193.42	8964.7	9423.91	10730.8	11980
INSIG1	Induced	4258.27	3821.22	4277.93	7887.77	10437.1	11353.9	11491.4	12251.9	12258.4
CD44	Induced	4134.19	4649.42	5394.71	7012.28	9587.12	10299.7	11538.2	12153.2	12277.5
SFXN2	Induced	2729.49	3348.54	4480.75	5460.6	7077.18	8179.24	10558.1	14528.3	19619.7
PRC1	Induced	7363.19	7632.65	7339.76	7653.25	7825.52	7690.21	8702.27	10036.8	10810
SVIL	Induced	3871	4014.43	5310.97	10597.8	11785.2	10064.6	9102.28	8752.13	9012.39
MCM2	Induced	5451.66	5234.74	5332.26	5946.1	7761.05	8804.04	9799.49	10885.5	12165.3
TTC39A	Induced	5312.38	5727.48	6984.23	8254.23	8560.6	8314.55	8630.36	8935.68	9767.41
FDFT1	Induced	4148.33	4315.97	4927.05	6260.43	7563.5	7910.29	8874.3	9207.92	9954.38
FADS1	Induced	4083.85	4221.26	4245.11	5215.24	6898.87	8227.78	9163.19	10219.9	9999.88
UNG	Induced	4174.85	4055.17	3939.15	4857.42	6391.99	7857.86	9381.73	10061.3	11087.9
C1QTNF6	Induced	1646.09	3435.01	6389.51	7904.71	8228.97	7924.09	7668.43	8289.16	9787.15
HMGB2	Induced	6143.13	6563.27	5097.73	4834.03	5310.19	5641.84	6519.59	7964.53	9325.36
H19	Induced	438.63	1808.75	6629.89	7495.88	7523.97	8340.08	8858.95	8701.17	7403.46
STMN1	Induced	5823.66	5563.71	4909.74	5342.83	5472.27	5488.26	6198.63	7250.28	10207.8
MYB	Induced	2538.2	3936.01	5831.42	6367.1	6902.53	6785.76	7578.47	7960.48	8175.75
CXCL12	Induced	975.543	2570.61	6012.93	8429.81	8238.26	7365.39	7003.35	7174.4	6948.84
TIMELESS	Induced	4780.67	4587.83	4415.37	4638.32	5443.54	5720.07	6373.83	8161	9805.07
TMPO	Induced	4585.52	4666.48	4367.33	5179.75	6323.72	6488.69	6946.13	6909.72	7479.05
TPX2	Induced	5561.17	5373.94	4540.77	4788.65	5707.48	5705.7	6598.42	7318.32	7135.68
PAPSS2	Induced	2081.58	2444.05	3631.59	5863.38	7424.01	7850.46	8661.66	7636.17	6451.57
C6orf141	Induced	2561.84	3960.13	3329.17	4679.39	6371.48	6794.13	7754.5	8288.49	7663.04
JAK2	Induced	1327.25	1448.57	5491.46	8232.45	8350.74	7048.94	6429.14	5925.77	6559.25
FEN1	Induced	3636.02	3666.02	3850.29	4970.77	6182.65	6534.23	6687.8	6802.04	8424.64
SGK3	Induced	974.536	1127.4	2683.47	4566.48	6370.19	7284.84	8402.62	8788.88	9362.33
CCNB1	Induced	4729.54	4508.82	4279.59	5193.44	5846.93	5845.17	6301.16	6390.16	5883.78
PCNA	Induced	3690.57	3231.6	3259.92	4074.08	5123.54	5740.89	6659.53	7676.73	9230.53
THSD4	Induced	2799.91	2986.24	2754.82	2071.83	4360.86	7591.79	9146.63	8526.5	7906.81
LRIG1	Induced	2299.59	2422.09	5936.45	6531.24	6727.86	5955.25	5710.12	5714.87	6630.87
ANLN	Induced	4216.08	3914.27	3549.62	4044.87	5301.75	5721.9	6458.37	7164.04	7068.87
TET2	Induced	3173.63	3239.26	3162.05	4664.65	6586.95	6327.41	7258.53	6843.07	6144.02
UGDH	Induced	2253	3057.1	3757.07	5063.22	6429.47	6848.22	7176.57	5915.74	6085.02
HMGCS1	Induced	2633.2	2939.18	3414.31	4673.65	5764.81	6260.46	6335.33	6402.57	6574.14
OGFOD1	Induced	2480.97	3541.11	4649.59	5711.76	6122.92	5506.84	5606.43	5386.16	5959.57
TK1	Induced	3658.54	3435.43	3564.22	3718.2	3984.06	4606.74	5423.91	7003.23	9065.18
RBM14	Induced	2721.56	2787.76	4230.68	4878.86	5680.91	6223.1	6222.2	6066.82	4660.78
ELOVL5	Induced	2585.58	2912.53	3312.51	4620.02	5156.91	5582.91	5844.07	5742.28	5867.7
IDI1	Induced	2495.44	2503.3	2944.01	4500.34	5038.87	5626.36	5647.8	5645.57	6604.84
FDPS	Induced	3533.17	3490.84	3339.2	3807.62	3869.02	4044.31	4792.31	5795.26	7380.33
C1orf226	Induced	1250.91	1166.04	3019.72	6042.02	5852.83	5471.49	5240.37	5422.52	5587.5
MCM5	Induced	2617.5	2512.14	2600.92	3046.28	4000.67	4675.01	5584.28	6576.83	6715.05
AURKA	Induced	3594.49	3115.97	3123.19	4320.07	4840.66	4586.69	4902.26	5219.68	4424.88
RBBP8	Induced	2120.34	2230.49	2975.09	4040.48	4662.15	4676.79	4995.53	5342.77	6801.14
PLAC1	Induced	195.502	308.874	1307.04	2903.11	4965.24	5989.27	6931.03	7464.45	7217.2
H2AFX	Induced	2996.62	2796.97	3684.35	4025.66	4432.83	4764.75	4559.21	4463.83	4671.8
PLK1	Induced	3585.19	3485	3466.21	3785.68	4262.7	4308.8	4633.87	5061.72	3737.54
UHRF1	Induced	2078.52	2036.49	2086.38	2971.99	4662.49	5267.9	5292.34	5503.84	6224.62
GLA	Induced	1974.03	2249.93	2817.43	3665.69	4201.43	4228.42	4632.09	5451.93	6753.87
RACGAP1	Induced	3639.08	3485.37	3177.73	3563.6	3926.82	3944.95	4390.91	4723.68	5011.9
GINS2	Induced	2353.17	2353.53	2392.75	3008.26	3651.79	4162.37	5221.04	5845.71	6747.54
TACC3	Induced	3285.7	3306.97	3403.37	3325.85	3788.91	3954.78	4286.13	4660.72	4901.36
CDC6	Induced	1773.57	1962.08	2126.43	3136.74	4472.17	5083.56	5138.48	5258.34	5941.35
DHFR	Induced	3066.28	3105.77	2790.88	3077.84	3393.92	3545.67	4072.35	4980.4	6585.76
ADORA1	Induced	353.025	863.688	5856.23	6276	4819.24	4237.89	3778.21	4129.01	4277.43
GRIK3	Induced	946.096	1010.55	1023.65	2674.99	5090.32	5884.85	5932.75	6144.85	5352.13
C15orf42	Induced	2460.14	1922.69	2607.45	3337.58	4302.01	4285.46	4442.92	5101	4740.44
PITPNC1	Induced	2210.18	2232.33	2020.72	3229.93	4034.5	4258.28	4651.5	4809.75	5360.85
MYEOV2	Induced	2273.21	2329.64	3162.6	3361.97	3833.83	4126.48	4350.75	4518.78	4779.48
FOXM1	Induced	3194.58	3368.76	3215.31	3102.62	3371.74	3241.72	3601.37	4177.61	4917.02
ASF1B	Induced	2517.67	2737.86	2756.99	3125.81	3349.96	3601.56	3884.44	4351.7	5258.67
CTR9	Induced	2297.01	2965.33	3511.74	3816.78	3818.41	3425.91	3500	3710.98	4045.06
?	Induced	2564.28	2717.65	2869.3	3124.42	3275.29	3433.73	3870.36	4220.3	4372.03
FARP1	Induced	1395.52	1431.67	1607.43	3779.98	4924.45	4776.92	4799.22	4025.37	3602.46
DUSP16	Induced	2210.6	2284.77	2845.24	3525.32	3805.49	3726.7	3614.07	3984.71	4009.32
WISP2	Induced	943.098	1454.9	2063.81	2482.33	2636.46	3217.84	3906.15	5335.36	7518.5
PAQR4	Induced	2052.26	2100.57	1992.29	2367.97	3321.46	3918.75	4089.65	4471.45	4905.79
TMEM194A	Induced	2038.73	2194.99	2595.35	2910.52	3387.72	3633.35	3873.32	3973.91	4388.13
SEMA3B	Induced	1046.95	1901.84	3958.89	3640.87	3774.79	3477.65	3487.92	3638.34	3908.24
KIF20A	Induced	3131.3	2940.53	2559.88	2568.6	2893.58	2868.62	3472.55	4162.39	3702.56
CENPF	Induced	3179.5	2822.67	2300.58	2364.68	3093.66	3099.37	3425.13	3825.59	3288.07
FANCD2	Induced	2646.73	2540.49	2345.37	2326.39	2639.69	2826.35	3162.29	3881.85	4963.25
TYMS	Induced	2371.72	2409.1	2244.04	2565.12	2741.93	2867.92	3195.21	3781.4	5051.31
TMEM97	Induced	1982.84	2061.63	2248.31	2687.33	3187.49	3553.19	3608.71	3721.49	4170.21
DEPDC6	Induced	1225.24	1208.52	1233.64	1894.06	2815.89	3792.8	4575.68	4865.04	5492.99
BRCA1	Induced	2072.82	1943.12	1725.26	1978.84	2918.41	3399.01	3675.34	4276.99	4908.72
CDC20	Induced	2315.59	2401.94	2377.78	2651.89	3059.46	3284.75	3491.26	3812.48	3411
HR	Induced	1563.15	1917.72	3311.37	3238.42	3502.03	3481.59	3187.11	3117.78	3389.56
ASNS	Induced	1991.53	1824.74	2324.55	2741.13	2970.55	3366.7	3659.44	4045.15	3644.16
KIF23	Induced	2945	2837.79	2468.05	2594.23	2930.06	2918.9	3030.3	3295.66	3420.78
TST	Induced	1911.57	1891.64	2623.77	2807.13	2892.01	3188.13	3391.24	3538.91	3754.25
SPAG5	Induced	2552.98	2721.98	2551.43	2589.5	2680.11	2503.24	2826.38	3347.57	3776.6
CDCA5	Induced	2232.52	2124.5	1874.27	2292.32	2682.15	2812.64	3143.58	3468.79	4213.18
ASPM	Induced	2574.6	2332.09	2138.36	2182.63	2674.98	3083.04	3293.6	3349.83	3146.79
ARHGAP11A	Induced	2204.92	2139.2	1995.69	2401.08	2988.48	3066.09	3188.6	3090.39	3160.92
SLC39A8	Induced	964.804	954.826	1178.48	1973.46	2582.13	3510.29	3761.33	4291.51	4796.9
LRP8	Induced	1417.21	1579.45	1867.85	2389.8	3333.95	3718.34	3774.5	3047.46	2870.07
XRCC3	Induced	1438.67	1633.02	2484.68	2583.29	2854.2	3050.5	3076.45	3333.65	3365.68
CENPN	Induced	2095.54	2024.75	2141.62	2433.87	2496.63	2707.22	2859.31	3212.8	3733.24
SEPT5	Induced	770.453	1066.74	2407.79	2731.81	3181.52	3098.03	3081.17	3459.57	3906.46
CDCA7	Induced	942.528	967.386	1141.8	2163.78	3243.15	3725.97	4055.78	3619.36	3730.27
MCM10	Induced	1386.51	1289.9	1413.49	2023.51	2793.91	3129.37	3506.72	3739.41	4196.56
CDCA8	Induced	1971.14	2157.98	2447.44	2546.64	2566.13	2603.64	2759.69	3167.23	3245.41
PLOD2	Induced	1486.72	1477.05	2030.3	2750.34	2833.8	3163.44	3060.38	3028.9	3036.48
E2F1	Induced	1516.59	1589.62	1590.97	1764.28	2291.87	2668.34	3029.64	3647.85	4380.98
RERG	Induced	675.095	800.842	1446.21	2269.73	2843.69	3350.01	3670.09	3516.55	3828.19
NECAB1	Induced	1298.88	1427.18	1215.85	1478.76	2148.07	2971.72	3901.19	3970.95	3943.87
UBE2C	Induced	2049.32	2106.85	2063.07	2252.45	2512.01	2694.88	2852.61	2975.26	2804
DOK7	Induced	881.197	1561.81	4061.64	2444.39	2167.55	2259.71	2531.86	3101.4	3267.7
CDK1	Induced	2140.93	1875.19	1753.28	2272.64	2521.37	2692	2881.52	2839.98	3243.2
RFC2	Induced	1805.36	1735.05	1775.65	2065.29	2359.46	2514.35	2819.2	3144.8	3692.67
PHLDA1	Induced	1003.69	1532.13	2646.63	3176.82	2514.88	2518.97	2744.71	2624.74	2580.7
KIF11	Induced	2197.39	2128.15	1768.19	2039.52	2413.19	2481.2	2597.01	2638.27	2991.98
CCDC21	Induced	1497.45	1711.52	2424.59	2666.9	2633.38	2387.25	2429.41	2594.61	2545.38
NUSAP1	Induced	2182.56	2245.94	1915.08	2162.31	2115.39	2262.13	2430.46	2612.54	2921.94
RNF26	Induced	2014.03	2197.1	2015.66	2003.57	2204.49	2423.5	2500.57	2691.19	2464.75
IL6ST	Induced	1060	1273.87	2247.79	2827.25	2895.27	2789.65	2320.61	2441.88	2535.62
MVD	Induced	1408.02	1336.94	1691.3	1743.58	2213.99	2378.32	2648.33	3170.02	3488.4
SERPINA3	Induced	663.057	829.859	908.137	1383.67	1766.64	2115.8	2800.83	4111.84	5106.16
C3	Induced	101.02	226.153	1834.33	2811.56	2708.26	3361.49	2816.98	3088.71	2676.1
CDC25A	Induced	1027.02	1148.16	1719.61	2246.95	2701.53	2620.86	2514.87	2606.92	2929.12
DTL	Induced	913.249	837.932	835.866	1554.76	2612.76	2813.58	3086.43	3128.53	3516.12
RAP1A	Induced	1276.48	1349.85	1597.17	2250.52	2295.83	2390.64	2479.34	2650.06	2903.09
CCNE2	Induced	1153.59	1197.62	1400.33	2340.89	2562.43	2364.4	2223.14	2271.03	3656.36
WDHD1	Induced	1500.68	1307.04	1094.72	1367.27	2196.62	2595.6	2831.26	2946.37	3281.19
GINS1	Induced	1486.45	1484.56	1398.09	1829.26	2184.62	2418.53	2602.84	2606.89	2994.46
POLA2	Induced	1558.67	1536.54	1327.97	1327.76	1843.73	2220.34	2678.95	3036.61	3429.92
ESPL1	Induced	2121.63	2071.58	1709.69	1601.04	1935.2	2030.46	2202.89	2563.01	2551.47
SCNN1B	Induced	292.405	472.361	1011.04	1772.15	2581.38	2804.07	3015.78	3404.97	3210.51
MGP	Induced	467.794	604.949	559.666	797.282	1400.46	1482.63	2555.78	3588.49	7036.57
SC4MOL	Induced	1045.19	945.851	1250.55	2169.81	2328.45	2845.18	2623.6	2421.87	2585.01
KIFC1	Induced	1862.78	1997.28	1602.87	1566.53	1845.07	1897.57	2155.93	2447.68	2792.29
KIF2C	Induced	1807.07	1755.96	1499.01	1739.91	2028.54	2008.38	2174.15	2530.75	2520.99
MTHFD1L	Induced	1244.24	1154.11	1182.32	1766	2266.35	2499.31	2787.71	2685.5	2203.03
TIAM1	Induced	988.067	924.178	955.229	1396	2731.71	3066.49	3058.82	2465.82	2182.15
MPST	Induced	1242.56	1618.02	2176.69	2194.62	2129.99	2126.11	2160.37	2097.59	1991.05
DDAH1	Induced	1263.57	1102.72	1266.78	1691.94	2039.48	2379.93	2603.61	2456.14	2654.86
WDR62	Induced	1260.15	1249.77	1270.56	1473.88	2022.28	2386.46	2443.22	2613.5	2718.82
CCNB2	Induced	1787.23	1685.35	1564.91	1632.37	1749.47	1844.37	2114.93	2482.17	2479.26
BIRC5	Induced	1771.19	1346.74	1544.36	1652.08	1886.73	1936.7	2292.63	2521.79	2384.24
PIP4K2A	Induced	1181.52	1131.34	2116.09	2534.36	2262.56	2053.63	1980.54	1927.91	2112.19
SDC2	Induced	825.843	840.737	1307.08	1916.82	2158.37	2270.35	2447.82	2659.39	2705.5
NT5C2	Induced	1149.74	1189.8	1346.43	1901.75	2179.99	2391.13	2447.17	2226.74	2255.01
KIAA0101	Induced	1646.15	1732.38	1367.24	1608.53	1627.91	1634.32	1844.68	2290.81	3332.96
GSN	Induced	1351.84	1397.44	1832.13	1720.95	1741.02	1888.38	2024.71	2383.53	2452.92
CCNA2	Induced	1504.12	1404.47	1381.98	1677.61	1861.58	2042.96	2227.34	2209.21	2341.26
BUB1B	Induced	1654.23	1589.3	1350.43	1478.58	1715.33	1846.05	2162.56	2360.55	2474.76
UBE2T	Induced	1338.37	1412.52	1489.92	1764.35	1846.82	1902.88	2003.42	2191.85	2623.69
A4GALT	Induced	779.612	1092.59	2206.99	2180.27	1985.24	2030.76	1925.77	2204.53	1978.33
CEP55	Induced	1238.4	1327.89	1468.11	1691.1	1875.01	1941.15	2095.26	2228.95	2394.73
IQGAP3	Induced	1751.79	1845.58	1686.93	1442.69	1527.71	1510.14	1636.38	2210.92	2622.49
NCAPH	Induced	1517.08	1562.47	1426.14	1448.99	1585.33	1650.78	2006.88	2424.12	2611.16
SERPINA1	Induced	603.487	711.449	1069.4	1445.27	1724.54	2023.12	2112.14	2730.16	3798.81
TUBB6	Induced	1453.14	1366.58	1500.29	1484.3	1624.56	1785.9	2027.82	2407.07	2508.98
PRR11	Induced	1928.71	1859.73	1564.04	1523.77	1758.31	1651.42	1830.55	2034.51	1959.4
MLF1IP	Induced	1288.28	1284.15	1138.32	1230.28	1530.5	1733.63	2124.99	2466.77	3205.46
TROAP	Induced	1633.04	1673.37	1574.53	1598.88	1724.41	1701.24	1932.79	2136.49	1896.61
PKMYT1	Induced	1367.22	1414.47	1425	1095.16	1321.1	1691.22	2016.93	2560.61	2780.18
BRCA2	Induced	1158.86	1089.01	963.323	1307.17	1861.28	2126.67	2280.89	2242.01	2444.61
KIF4A	Induced	1723.35	1613.25	1445.36	1503.17	1638.67	1536.82	1764.19	2051.9	2141.88
ZNF367	Induced	892.954	834.212	844.677	1720.13	1910.95	2020.78	2107.2	2304.32	2651.86
BUB1	Induced	1541.26	1381.87	1197.37	1315.65	1638.52	1804.23	1970.43	2242.36	2150.61
CKS2	Induced	1407.93	1318.98	1321.36	1724.84	1775.23	1836.47	2060.76	1944.05	1830.25
DLGAP5	Induced	1644.97	1509.26	1306.55	1515.91	1693.6	1750.79	1799.37	2010.27	1923
ZDHHC22	Induced	217.713	764.759	2220.82	1951.29	2115.71	2076.66	1813.39	1751.4	2182.75
ATRIP	Induced	1120.6	1088.88	1395.46	1657.58	1720.28	1761.61	1884.33	2111.96	2286.47
CIT	Induced	1928.18	1828.02	1508.19	1153.74	1314.35	1340.59	1602.38	2049.3	2229.88
STIL	Induced	1263	1175.39	1073.45	1477.28	1913.51	1852.68	1933.62	1954.34	2168.5
FAM111B	Induced	1040.09	884.019	969.569	1558.34	1808.6	1911.93	1745.72	1895	2961.76
ARL3	Induced	952.412	1001.88	1233.82	1704.17	1743.14	1835.4	1864.79	2009.1	2396.49
SUSD4	Induced	736.59	834.683	1191	1516.54	1960.2	2159.56	2230.07	2082.43	1855.88
CENPE	Induced	1696.69	1491.04	1160.06	1410.27	1736.71	1720.96	1831.76	1873.17	1589.59
GPR89C	Induced	752.764	1594.57	1845.06	2185.73	1823.29	1823.88	1185.28	1491.71	1691.8
CUEDC1	Induced	625.291	687.649	1146.58	1595.27	2044.47	2123.24	2118.64	2127.04	1917.5
ORC1L	Induced	780.267	862.696	759.631	1161.58	1713.77	1922.87	2234.14	2261.82	2600.05
ALDOC	Induced	510.689	746.639	1381.51	1753.63	1856.77	1826.32	1941.67	1984.05	2241.05
HJURP	Induced	1341.28	1239.16	1072.54	1460.44	1615.93	1723.91	1853.57	1896.25	1928.52
DYNLT3	Induced	683.722	758.566	1204.79	1770.98	1816.83	2063.33	2157.04	1775.68	1832.37
FAM83D	Induced	1204.07	1194.23	1237.01	1636.17	1780.46	1711.42	1796.65	1779.19	1544.03
UBE2S	Induced	1200.15	1201.69	1466.03	1557.82	1542.17	1630.82	1667.51	1699.45	1515.18
CLSPN	Induced	871.77	859.922	858.094	1184.56	1751.19	1675.99	1703.66	1974.68	2492.2
SYTL4	Induced	730.24	729.281	871.806	1262.33	1707.78	1808.33	1820.02	1855.5	2573.55
CHAF1A	Induced	1049.42	967.686	893.654	1119.41	1517.95	1657.18	1697.16	1986.7	2209.09
CKS1B	Induced	1206.74	1167.53	1112.74	1227.64	1285.24	1402.03	1699.97	1879.61	2114.62
DHRS2	Induced	705.863	880.632	1091.01	1241.53	1484.51	1661.02	1896.2	2087.15	1971.55
GPSM2	Induced	1249.92	1240.03	1090.62	1289.03	1554.98	1515.66	1654.42	1638.58	1625.21
E2F2	Induced	1021.54	1386.36	1328.54	1052.05	1197.3	1278.04	1465.05	1873.14	2212.94
MELK	Induced	1145.5	1074.95	973.051	1120.76	1343.58	1489.68	1686.15	1839.7	2111.43
ACAT2	Induced	1122.51	990.497	970.587	1166.31	1292.94	1346.33	1537.63	1852.21	2402.55
MASTL	Induced	1022.51	1045.39	917.938	1020.59	1212.78	1410.65	1600.9	1896.45	2295.9
SLC4A10	Induced	1363.78	1389.68	1387.19	930.043	707.524	669.463	1201.42	1828.65	2306.57
SPOCD1	Induced	275.41	373.715	851.456	1145.33	1522.17	1523.36	1595.84	2077.31	2406.78
EXO1	Induced	902.96	756.867	742.406	912.674	1197.95	1369.21	1563.14	1871.14	2416.12
CASC5	Induced	1220.39	1134.95	1025.56	1086.88	1357.63	1376.75	1416.31	1435.22	1625.93
HMMR	Induced	1220.88	1232.33	942.55	1105.13	1187.51	1304.36	1586.73	1501.53	1459.49
PHF19	Induced	1140.94	1208.72	1063.95	1007.63	1156.06	1209.41	1294.72	1614.22	1772.6
TMPRSS3	Induced	208.228	559.477	1208.19	1345.46	1269.8	1200.59	1522.86	1784.91	2253.66
WDR76	Induced	720.639	598.585	604.056	973.46	1361.41	1446	1513.79	1821.81	2268.67
C15orf23	Induced	1086.02	1006.93	1032.44	1223.9	1323.43	1311.15	1436.67	1506.1	1379.15
NOS1AP	Induced	335.47	322.083	1155.75	1726.56	1760.95	1644.15	1384.03	1413.29	1513.27
MVK	Induced	797.732	680.542	818.397	1019.98	1328.82	1468.78	1607.21	1791.83	1731.3
CCDC99	Induced	988.331	874.003	806.391	1121.76	1332.64	1429.02	1515.89	1558.89	1495.14
CDC45	Induced	863.112	849.297	801.978	779.609	917.652	1057.95	1394.15	2004.15	2440.24
AFAP1L2	Induced	623.767	1035.67	965.111	1079.23	1426.29	1433.36	1486.98	1376.98	1523.54
SLC1A4	Induced	608.571	611.385	766.35	963.024	1374.16	1579.68	1593.28	1629.72	1779.13
CHAF1B	Induced	818.468	791.367	790.99	932.068	1234.1	1335.22	1391.86	1553.77	1971.46
NCAPG	Induced	1083.88	936.738	885.048	1020.15	1102.01	1219.73	1364.71	1468.26	1716.8
GMNN	Induced	737.75	640.141	619.125	1077.72	1347.16	1441.02	1524.69	1516.64	1828.45
CHRNA5	Induced	709.395	708.236	773.355	1009.53	1191.04	1540.52	1535.12	1512.6	1672.21
KIF18B	Induced	925.828	919.199	986.372	1084.82	1217.02	1221.97	1341.66	1502.95	1438.95
CALB2	Induced	215.048	250.713	715.347	1094.24	1219.27	1382.44	1508.47	1816.57	2426.41
DSN1	Induced	835.448	896.995	720.76	928.446	1178.27	1359.79	1462.41	1490.65	1698
LRRN2	Induced	474.876	481.385	969.717	1531.18	1619.48	1467.72	1360.31	1322.76	1287.18
RAD54L	Induced	949.426	880.305	683.728	804.969	1006.74	1179.27	1363.8	1555.73	2080.34
NEURL1B	Induced	1131.85	1250.16	1539.59	1132.26	1076.87	1067.47	1047.73	1082.72	1154.45
PLK4	Induced	928.686	954.817	777.695	925.214	1111.95	1285.44	1350	1442.62	1678.49
KRT15	Induced	268.902	496.397	836.534	1237.45	1443.75	1549.7	1638.16	1642.54	1329.13
KIF14	Induced	1133.1	1036.77	896.641	933.749	1197.59	1184.3	1233.18	1338.37	1290.49
HAUS1	Induced	606.291	711.604	784.66	1055.45	1119.62	1215.67	1346.66	1466.5	1821.16
RAMP1	Induced	817.036	858.166	1027.28	1009.58	984.266	1108.26	1272.05	1460.95	1564.9
EPR1	Induced	852.854	1086.01	1002.31	1207.42	981.926	1072.23	1106.19	1228.08	1547.96
E2F8	Induced	853.534	789.943	622.352	827.634	1029.33	1078.5	1291.87	1543.07	1888.27
FAM65C	Induced	302.655	525.237	926.902	780.448	985.6	1171.68	1592.14	1786.23	1808.46
GINS3	Induced	639.648	668.614	768.601	1082.41	1213.01	1202.47	1284.1	1401.46	1564.63
ORC6L	Induced	665.437	660.565	827.415	944.481	1153.83	1241.14	1320.42	1406.81	1558.5
PTTG1	Induced	1002.92	985.596	899.618	1005.39	998.144	1029.75	1151.58	1251.93	1431.88
C11orf82	Induced	695.472	634.112	689.861	930.156	1128.96	1470.11	1423.65	1300.57	1464.87
MAMLD1	Induced	578.943	617.29	771.431	987.331	1351.13	1383.14	1457.67	1372.58	1196.78
NT5DC3	Induced	645.705	760.44	1097.89	1055.58	1171.14	1183.18	1214.35	1242.5	1199.51
CTNNAL1	Induced	847.089	692.589	716.478	831.71	1013.96	1157.67	1269.18	1326.5	1697.58
HELLS	Induced	761.269	691.925	686.737	821.878	930.035	1162.58	1328.51	1316.64	1641.01
RAD51	Induced	679.004	643.54	564.624	694.771	857.909	1060.68	1334.81	1603.98	1875.04
RNFT1	Induced	627.139	724.522	914.281	1049.27	1070.99	1222.29	1203.55	1127.49	1248.44
FAM46C	Induced	452.414	830.725	482.376	748.578	1318.09	1145.55	1243.53	1379.53	1568.31
DSCC1	Induced	666.688	613.159	575.975	718.164	962.729	1191.11	1364.35	1316.81	1739.53
KIF15	Induced	1013.33	914.086	680.101	758.409	933.812	961.621	1112.01	1224.69	1543.37
IL4R	Induced	709.282	770.506	1018.71	965.237	980.482	1020.76	1113.11	1178.18	1366.99
CHEK1	Induced	678.449	679.607	558.937	792.454	1059.4	1189.62	1295.53	1319.55	1527.89
PSRC1	Induced	1006.94	890.237	774.388	883.029	1020.18	992.884	1120.19	1278.54	1040.05
CDCA3	Induced	859.71	861.229	782.522	837.787	914.366	932.383	1101.8	1196.41	1291.65
DEPDC1	Induced	791.776	721.206	618.758	836.043	913.756	1102.92	1233.4	1274.95	1176.83
SKA3	Induced	807.773	694.811	670.529	810.379	909.208	1060.5	1129.84	1173.23	1402.36
ERCC6L	Induced	689.843	557.39	567.701	823.999	1048.61	1092.85	1206.42	1236.69	1403.71
XRCC2	Induced	544.139	532.719	626.02	724.747	1003.36	1152.89	1217.45	1329.3	1489.92
SGOL2	Induced	762.576	651.637	605.396	964.94	1069.23	1182.4	1198.96	995.401	1085.68
MTP18	Induced	587.563	651.311	793.262	963.927	1032.12	1032.92	1185.31	1127.54	1131.97
SLC27A2	Induced	732.139	720.711	832.4	763.749	883.487	853.424	988.55	1150.17	1570.52
NDC80	Induced	886.537	775.852	600.877	730.093	891.684	946.777	1081.9	1173.54	1231.25
RFC4	Induced	679.814	571.908	488.544	620.292	876.683	1009.69	1135.43	1237.79	1603.21
RGNEF	Induced	416.249	375.712	431.964	1282.81	1459.04	1125.48	1070.16	995.293	1052.64
E2F7	Induced	649.552	656.959	515.976	702.993	1064.86	1013.68	1034.53	1021.05	1426.67
TIPIN	Induced	549.113	552.943	608.319	912.522	1076.6	1096.88	1030.03	996.687	1231.87
GTSE1	Induced	824.937	772.266	815.103	843.91	942.814	890.063	953.648	1004.65	930.022
COL1A1	Induced	579.703	674.366	1040.63	915.364	1050.97	951.924	886.293	868.88	961.445
INTS7	Induced	566.029	520.836	650.065	894.525	1022.98	1013.23	1027.54	1020.35	1142.29
LYPD6	Induced	440.995	421.001	559.231	833.03	1053.21	1090.82	1081.95	1145.64	1158.83
CEP135	Induced	544.375	540.594	626.961	818.265	982.285	995.595	1053.9	1097.05	1120.1
CHEK2	Induced	583.198	631.187	625.079	786.568	859.452	924.023	1009.67	1037.68	1281.2
THRB	Induced	753.818	779.127	623.383	315.562	385.139	746.6	1132.49	1514.87	1486.01
IGSF1	Induced	195.154	218.327	254.255	392.58	636.529	693.52	1053.55	1473.36	2779.96
COL21A1	Induced	204.521	205.23	181.646	302.727	644.461	690.379	978.667	1449	3001.53
CAV1	Induced	309.722	474.9	571.478	774.605	913.378	1049.77	1158.56	1098.75	1227.95
CDC7	Induced	528.097	502.79	438.684	672.447	866.678	1006.82	1149.06	1132.12	1264.72
CHST10	Induced	438.599	528.667	858.996	995.016	976.927	941.002	878.347	947.269	971.431
LBR	Induced	678.244	610.347	620.806	769.322	912.799	1015.72	1021.59	926.008	958.093
GEM	Induced	153.658	545.885	528.63	939.689	806.767	885.414	1007.54	1216.58	1414.75
GPR68	Induced	335.386	521.849	860.52	673.577	633.679	685.03	912.931	1423.04	1448.23
CENPO	Induced	610.994	653.945	619.669	661.975	853.983	910.01	964.106	1026.63	1181.87
CDCA2	Induced	676.134	640.973	602.467	799.622	908.34	886.072	1006.46	955.944	978.105
SERPINA5	Induced	153.686	251.822	449.679	832.233	926.89	1048.53	1307.83	1288.61	1148.11
TTK	Induced	787.086	647.826	457.782	602.652	797.361	925.571	1040.36	1062.67	1075.2
GINS4	Induced	478.662	553.233	581.933	643.589	746.138	837.384	942.149	1196.07	1405.13
NBL1	Induced	475.838	586.152	762.304	848.698	805.207	861.58	888.926	863.533	1060.76
CACNA1D	Induced	541.784	547.257	605.716	615.844	1054.69	1108.46	991.066	839.586	806.943
PIM2	Induced	515.501	451.494	544.887	742.516	912.065	971.766	991.631	1021.3	943.751
CDKN3	Induced	642.661	640.776	672.674	750.945	804.441	854.706	876.739	838.086	975.927
C6orf167	Induced	538.405	447.444	401.076	558.842	838.083	1060.76	1052.94	970.326	1142.45
WIPF1	Induced	514.328	467.447	877.72	900.968	845.411	761.286	764.661	826.572	1041.78
FAM108B1	Induced	625.823	700.215	626.543	684.293	740.997	814.415	902.566	918.392	977.87
FHL1	Induced	408.833	455.238	461.01	500.022	611.291	707.449	872.17	1198.77	1675.49
SPIN4	Induced	516.578	496.695	497	652.291	836.253	933.978	917.333	875.676	1079.53
IFNAR2	Induced	414.64	482.897	591.574	696.688	822.191	917.116	922.087	888.573	1048.2
RGS12	Induced	645.999	663.566	715.134	742.062	767.275	683.665	733.807	863.751	938.378
PBK	Induced	657.061	667.387	582.975	652.153	657.466	741.169	781.391	842.735	1081.48
CXCL14	Induced	324.618	334.667	376.362	532.993	731.12	767.58	981.466	1176.28	1436.68
GJB3	Induced	234.504	424.379	650.904	616.213	701.111	782.734	870.231	1104.16	1194.56
CYP26B1	Induced	215.414	257.439	382.351	729.104	872.076	840.214	871.492	1071.5	1314.71
SYNPO2	Induced	354.475	367.555	515.805	661.304	928.552	1057.72	944.729	835.472	832.155
SGOL1	Induced	562.361	456.163	447.848	610.803	740.425	786.028	884.391	912.197	1031.36
AURKB	Induced	705.94	632.43	543.27	599.637	630.888	645.302	730.848	918.974	1009.79
SFXN3	Induced	693.781	778.253	585.063	374.386	403.149	532.833	702.768	1062.26	1258.06
TFF3	Induced	448.403	459.331	551.131	632.288	605.373	679.972	848.16	975.903	1186.35
LOC81691	Induced	529.393	547.988	482.54	582.292	695.703	757.622	878.045	929.183	973.083
GPR77	Induced	280.189	416.283	666.36	680.51	763.609	915.398	923.929	854.869	815.862
CCDC74A	Induced	433.119	508.792	605.878	684.236	701.598	678.818	745.449	856.785	939.051
FAM57A	Induced	410.39	396.192	452.855	554.408	764.389	861.333	893.292	869.357	913.779
DEPDC1B	Induced	638.386	556.034	515.402	534.307	665.114	685.904	795.848	828.622	814.012
SYBU	Induced	128.659	213.345	665.088	761.102	890.423	870.684	841.675	793.169	829.106
ANKRD32	Induced	394.848	359.773	338.628	615.262	803.991	958.381	859.779	780.235	866.503
MT2A	Induced	657.737	685.541	745.204	682.14	630.071	706.807	614.085	598.908	644.464
C1orf135	Induced	365.154	403.756	579.426	709.766	792.401	733.398	747.657	756.831	754.191
MOCOS	Induced	417.877	471.186	402.21	482.5	660.421	761.9	892.791	883.58	857.614
FAM72D	Induced	571.685	485.592	375.643	527.744	703.741	724.488	866.651	804.994	751.894
DONSON	Induced	442.072	434.33	423.479	561.051	637.563	750.612	698.803	742.616	1021.03
CENPA	Induced	517.195	507.787	513.425	679.222	693.796	689.805	737.953	743.769	624.291
AREG	Induced	153.782	218.382	213.957	337.83	559.476	662.95	965.008	999.891	1542.54
NUF2	Induced	573.267	541.241	464.215	463.409	470.425	550.761	608.921	783.188	887.361
DIAPH3	Induced	461.842	471.71	408.982	474.29	475.471	559.818	684.001	753.623	971.654
RAMP3	Induced	171.269	200.243	287.336	415.673	561.839	645.717	707.167	999.716	1128.67
KIF24	Induced	381.925	383.012	343.888	402.603	559.467	621.687	667.873	803.673	930.596
SKP2	Induced	442.743	374.119	289.906	388.76	598.706	628.412	671.351	759.927	926.359
DBF4B	Induced	504.627	443.49	411.314	450.825	545.765	576.792	667.907	786.169	683.86
C14orf174	Induced	283.09	382.784	567.137	703.305	725.926	580.702	583.033	584.062	645.832
CA2	Induced	215.779	297.663	437.518	659.627	601.725	592.168	632.356	715.135	887.338
C1orf112	Induced	389.915	289.349	298.651	429.441	557.662	687.118	731.378	777.383	866.672
LRRC20	Induced	453.282	435.342	301.435	283.325	439.495	599.71	747.323	801.883	908.755
KCNK15	Induced	310.608	329.612	546.769	497.829	542.867	685.698	637.83	710.865	666.284
ESCO2	Induced	360.3	406.153	363.72	474.858	514.292	558.798	645.216	663.881	904.009
C4orf19	Induced	216.617	229.651	641.551	849.299	708.789	565.692	512.387	560.6	604.98
POLE2	Induced	368.435	363.381	324.54	412.66	531.781	669.899	680.26	671.269	846.065
TRAIP	Induced	431.294	438.557	394.712	406.01	509.916	615.049	676.265	686.511	698.389
CCNYL1	Induced	354.051	375.507	430.586	508.475	575.369	709.743	682.782	591.133	604.804
ANK1	Induced	240.257	208.887	349.496	512.375	773.376	681.754	673.92	549.568	799.757
C4orf21	Induced	444.533	416.733	346.517	316.302	409.127	503.918	575.367	758.705	961.458
CAPN2	Induced	349.213	388.216	406.309	433.025	495.663	520.124	688.143	773.7	672.815
PPM1E	Induced	339.66	331.239	351.239	382.317	464.926	585.853	788.424	761.588	704.702
DPYSL2	Induced	477.93	398.478	321.241	304.559	364.933	474.992	642.413	773.914	936.319
C9orf100	Induced	467.252	465.69	350.425	396.64	467.988	507.669	589.473	709.936	679.252
HES6	Induced	383.265	382.885	407.731	448.451	434.315	495.384	602.989	713.322	765.834
HECW2	Induced	351.548	345.623	307.641	314.535	459.681	550.848	744.877	803.253	714.038
CDKN2C	Induced	429.648	438.757	304.949	379.955	483.722	510.425	566.371	695.125	716.434
C9orf150	Induced	369.874	277.674	159.436	409.995	615.871	656.185	732.025	649.566	632.591
NRM	Induced	466.732	472.647	429.197	452.91	438.966	437.014	484.008	577.407	740.465
FAM64A	Induced	308.468	403.67	398.729	412.096	512.877	496.962	622.237	612.474	576.806
CEP110	Induced	431.062	405.487	312.281	289.617	474.135	519.498	612.369	667.547	619.335
LOC100134229	Induced	266.826	370.716	457.134	500.439	503.868	535.152	532.198	543.522	601.067
GAS2L3	Induced	432.878	388.149	341.627	389.079	492.517	482.296	549.374	634.11	581.761
VGF	Induced	329.467	331.442	398.518	364.335	418.652	569.866	619.924	676.799	560.405
CNKSR3	Induced	224.282	231.489	379.684	483.43	548.858	607.785	658.817	586.233	545.66
SOX3	Induced	222.644	321.462	365.727	405.026	431.185	498.161	571.62	701.853	738.397
SPC25	Induced	396.553	400.479	378.541	440.799	440.172	496.615	515.306	505.46	677.493
CENPM	Induced	394.314	359.345	352.627	388.295	405.964	464.115	493.419	585.573	744.467
ASCL1	Induced	281.268	196.959	116.229	327.848	518.652	657.951	764.236	713.894	604.757
C4orf46	Induced	339.34	324.133	318.101	438.134	502.641	555.368	576.554	554.703	569.886
POC1A	Induced	428.531	393.176	370.036	388.517	371.618	455.938	504.017	606.482	643.519
HYLS1	Induced	414.701	366.735	367.823	460.903	467.177	504.954	513.625	523.029	517.796
EME1	Induced	389.471	389.176	259.992	263.409	397.832	486.902	575.813	667.263	688.254
RASSF1	Induced	308.733	400.866	548.039	558.056	470.06	446.534	436.419	433.213	449.622
KIF18A	Induced	415.676	350.033	259.594	361.028	478.947	504.769	522.343	554.392	548.297
NEK2	Induced	413.053	395.43	327.47	374.747	414.145	421.2	504.63	579.894	562.469
MCEE	Induced	284.976	320.966	308.687	399.212	427.979	463.152	515.581	607.008	655.165
NXPH3	Induced	177.671	290.136	252.065	315.985	343.418	411.491	514.012	740.326	928.022
GSG2	Induced	288.857	381.475	385.541	408.997	469.106	436.881	482.368	503.929	557.619
CENPI	Induced	407.791	329.101	305.393	293.463	404.69	448.065	498.388	528.365	696.881
ATAD5	Induced	312.776	306.124	280.558	378.671	466.683	507.834	533.895	493.369	628.433
PIF1	Induced	400.889	404.245	323.813	351.547	433.025	465.24	495.505	591.412	402.843
RAD51AP1	Induced	317.015	331.821	286.018	336.383	379.959	406.591	471.522	524.562	689.419
ARHGAP33	Induced	485.646	512.331	444.964	280.478	325.806	372.001	352.857	440.424	526.888
CDC25C	Induced	471.11	481.352	326.013	278.782	290.577	306.854	416.048	537.907	589.465
FAM72B	Induced	332.943	372.794	270.579	272.249	348.137	491.07	501.067	439.233	445.767
PSMC3IP	Induced	261.392	232.678	230.156	350.124	472.647	406.079	454.612	494.027	559.658
LOC441208	Induced	243.916	324.647	378.646	329.115	404.804	397.847	434.311	458.732	469.741
CKLF	Induced	298.107	325.14	296.977	333.092	357.679	367.498	371.967	456.455	600.601
CENPK	Induced	291.373	278.375	263.902	300.117	333.553	372.582	453.003	473.663	621.255
WDR67	Induced	315.286	298.8	279.65	358.288	417.739	418.668	418.762	406.155	440.68
SKA1	Induced	269.263	314.526	291.107	323.909	347.515	397.088	393.193	424.79	518.217
TUBB4	Induced	263.306	330.952	340.507	361.377	355.298	358.208	410.051	408.664	401.824
PCDHB16	Induced	278.057	275.789	250.72	260.291	340.198	376.408	464.885	490.652	489.924
NIPAL1	Induced	173.997	249.92	395.185	325.906	293.96	384.415	403.914	399.712	407.515
FAM54A	Induced	216.479	230.932	240.372	284.536	360.353	388.116	414.827	426.397	471.258
FAM40B	Induced	125.674	166.514	132.552	218.514	438.576	463.264	473.286	403.952	550.41
FBF1	Induced	263.929	282.095	268.733	212.289	303.425	340.277	373.264	433.565	476.087
DPYSL4	Induced	128.636	168.066	347.777	349.131	378.692	419.155	358.603	379.158	383.599
MAOA	Induced	183.062	193.027	215.681	295.152	340.888	350.431	383.053	428.835	500.662
FNIP2	Induced	141.399	168.496	194.741	304.964	488.94	481.219	408.155	296.132	384.254
TMEM194B	Induced	262.741	230.771	212.016	191.744	275.385	317.7	344.994	458.341	571.838
CENPW	Induced	264.604	278.269	255.499	306.052	282.439	303.184	336.162	376.774	452.421
MFGE8	Induced	271.31	285.393	282.59	303.452	285.74	280.814	293.156	343.225	400.472
SUSD3	Induced	136.437	167.138	293.33	360.425	328.056	351.082	339.074	364.634	399.942
LOC100128191	Induced	293.087	277.77	246.333	233.485	271.629	307.632	320.09	338.797	444.554
NTN1	Induced	121.092	106.691	164.585	288.081	399.398	409.768	366.046	423.349	448.116
CCDC34	Induced	251.97	240.355	184.442	220.186	264.729	312.65	325.758	389.852	532.846
C14orf145	Induced	263.085	294.498	250.388	225.796	255.672	250.136	310.539	358.77	497.322
EHD2	Induced	197.851	204.671	284.861	236.744	306.252	321.201	320.609	360.419	434.06
KHK	Induced	243.806	236.367	248.198	203.926	246.845	266.297	292.869	413.436	492.719
YBX2	Induced	269.103	238.747	260.925	226.773	270.662	276.66	303.773	354.057	421.011
CKAP2L	Induced	260.124	247.259	199.571	250.9	285.756	306.626	325.528	353.26	361.898
PDZK1P1	Induced	131.693	110.916	185.75	250.056	112.987	436.916	272.943	439.345	645.332
C13orf34	Induced	241.001	210.389	214.261	303.017	337.464	331.456	337.094	305.592	272.427
NCKAP5	Induced	239.926	223.093	199.52	194.681	236.134	200.363	291.291	485.03	466.878
IL1RAP	Induced	153.257	165.258	139.429	203.461	355.999	384.49	387.721	338.977	369.734
TFPI2	Induced	133.976	148.966	188.376	248.241	256.309	321.694	371.42	390.186	416.507
METTL4	Induced	228.918	252.015	221.29	279.257	295.69	279.285	295.949	293.31	324.235
ADD3	Induced	195.162	202.979	184.949	230.854	296.012	317.805	334.999	356.438	350.156
NES	Induced	223.308	219.867	191.181	213.176	240.536	233.754	264.464	349.416	525.272
OVOL2	Induced	155.724	223.765	324.397	269.46	199.057	199.347	250.97	355.561	420.643
C1orf183	Induced	126.665	173.963	287.863	267.039	247.676	275.22	245.23	308.401	356.391
BTG3	Induced	140.996	152.961	178.867	260.268	282.486	305.368	313.452	258.867	390.773
COCH	Induced	236.326	213.278	224.545	206.651	204.85	219.243	211.221	247.032	478.385
CCDC74B	Induced	138.699	203.235	256.116	237.647	243.209	281.583	264.87	275.554	308.648
STARD4	Induced	113.395	123.928	90.7563	120.053	238.546	310.427	377.958	370.727	407.406
GNB4	Induced	191.199	164.75	165.582	168.542	209.251	252.69	274.859	318.935	357.429
NEIL3	Induced	207.149	162.683	154.266	190.852	211.47	225.485	253.909	286.096	374.78
C6orf150	Induced	124.591	105.976	156.596	256.259	268.425	258.366	264.372	285.891	310.078
AKR1C2	Induced	161.668	186.333	196.933	200.654	184.453	205.43	251.854	259.393	348.49
FANCB	Induced	146.593	122.755	126.316	172.625	250.702	283.436	284.86	259.185	335.484
LOXL1	Induced	117.324	144.039	189.051	204.234	255.237	243.942	253.672	274.996	281.141
ITGA5	Induced	142.458	175.52	130.364	154.525	253.928	292.383	278.093	261.451	236.315
ISG20	Induced	110.265	160.971	231.742	216.431	235.042	225.053	247.639	235.038	236.799
CAV2	Induced	144.819	169.865	163.497	150.516	208.073	193.999	271.502	299.9	272.776
CA8	Induced	139.923	138.18	139.823	109.703	177.713	193.085	260.343	300.645	405.628
ZNF165	Induced	190.956	176.217	159.013	193.884	250.044	211.605	234.554	229.377	217.445
GNA14	Induced	126.734	132.919	173.928	225.704	211.595	230.683	205.47	250.142	291.175
C5orf34	Induced	137.293	126.404	130.6	163.42	224.628	248.768	274.599	217.091	294.046
CCDC150	Induced	131.888	150.027	85.409	116.557	169.715	206.984	255.617	293.389	347.941
ZNF711	Induced	137.872	127.561	172.235	200.735	222.287	221.887	228.888	209.331	232.61
CSPG5	Induced	145.139	141.565	140.444	163.158	148.994	173.263	185.914	235.76	355.865
C1orf106	Induced	140.141	178.779	198.118	193.371	182.828	150.291	141.524	191.248	201.421
FABP5	Induced	117.324	98.0818	116.219	143.495	188.334	192.21	213.283	240.435	251.421
HSPA2	Induced	122.757	129.404	158.98	166.447	209.393	182.979	203.23	182.235	195.624
KCNS3	Induced	157.026	148.018	112.133	103.304	131.754	167.602	181.199	229.627	320.096
C18orf54	Induced	138.418	111.588	104.864	137.87	164.942	203.076	225.159	218.928	241.693
NRGN	Induced	129.385	110.297	122.677	123.569	138.806	140.94	169.474	208.634	318.529
GNG4	Induced	114.506	107.226	124.359	143.454	163.548	185.272	172.048	221.21	227.42
AFF3	Induced	107.531	103.026	97.8928	92.9437	125.728	179.744	231.606	225.786	166.002
AGAP2	Induced	179.608	180.805	124.255	82.2551	100.226	106.461	123.192	168.104	227.998
MAOB	Induced	120.26	132.556	124.789	115.728	111.014	126.288	126.166	140.331	207.761
RIBC2	Induced	103.061	75.6664	68.7827	111.203	148.643	155.875	163.451	158.403	217.463
SPC24	Induced	124.875	118.363	105.453	71.3038	87.1706	120.287	141.603	161.29	186.105
FILIP1L	Induced	144.362	87.5103	43.302	66.8854	64.5889	68.7369	85.6846	113.39	164.899

## Sheet: Table S3
miRNA	0	1	2	3	4	5	6	8	12	24
miR-21-5p	133718	129652	98806.8	123819	102561	129756	99296.8	117392	117227	91554
miR-200c-3p	32352.3	27603.7	37722.9	31409.1	36331.6	27109.8	35072.2	37232	29611.2	29570
Let-7b-5p	32014.8	25739	34199	27909.3	37659.3	27521	29264.2	26324.7	24654.6	25792.5
miR-93-5p	25675.4	24860.9	25255.2	26085.4	30300.5	27621.1	26361.8	27527.2	27891.9	27669.2
Let-7i-5p	19237.3	21814.5	23885.3	21942.9	24558.9	18738.3	21260.4	21497.6	24450.5	26496.5
Let-7f-1-5p	21634.7	22480.2	22901.9	21793.1	22447.3	20071.9	16745	23108.1	24433.5	20366.5
Let-7f-2-5p	21577.2	22438.7	22846.7	21759.3	22367.9	19976.4	16685.7	23106.3	24414.5	20344.2
Let-7a-2-5p	19056	19947	22995.1	19900.7	22185	17736.4	18716.8	20315	21664.5	20686.5
Let-7a-1-5p	18961	19853.8	22916.8	19812.4	22093.5	17612.7	18631.4	20222.1	21577.6	20620.9
Let-7a-3-5p	18898	19797.3	22852.2	19745.4	22017.3	17570	18566.7	20152.5	21509.3	20559.5
miR-320a	19429	15000.8	20396.2	15693.1	22614.7	17333	16200.8	16541.9	15877.6	16114.9
Let-7e-5p	17475.5	16197.5	20985.2	15389.1	19575.6	14384.4	14981.4	15079.6	14310.5	13597.3
miR-30d-5p	12921.8	13133.9	13579.5	13031.5	15235	15169.1	14879.2	12724.8	12909.3	14958.4
miR-181a-1-5p	12712.4	13383.5	13690.8	12558.6	16142.8	15598	15474.9	11513.8	13592.6	13381.2
miR-181a-2-5p	12704.5	13379.5	13686.9	12552.4	16134.5	15581.6	15468.4	11506.2	13587.4	13374.8
Let-7g-5p	11642.9	13329.3	14385.2	13669.6	13720.8	11721	12227.5	14293.1	16366.9	14370.1
Let-7d-5p	11912.3	12480.6	14909.8	12485.2	13641.6	10364.5	11651.7	12705.2	12585.4	12721.8
miR-125a-5p	10299.1	11202.5	10703.6	8472.56	10649	11925.1	14014.4	7216.86	8256.54	9322.47
miR-16-2-5p	10531.2	11697.3	9568.59	9895.18	9468.36	11344.4	9429.84	8944.92	9907.11	10175.2
miR-16-1-5p	10527.7	11690.4	9561.48	9877.91	9460.44	11340.5	9421.61	8935.48	9903.86	10167.4
miR-26b-5p	9986.96	9930.3	10631.4	10423.9	9953.54	8474.33	9249.48	11377.9	10424.2	8751.55
miR-103a-2-3p	8695.08	8714.04	9165.53	7766.33	8917.78	8450.96	8866.84	9297.7	9559.22	9140.67
miR-103a-1-3p	8594.02	8616.2	9059.59	7663.51	8798.56	8339.91	8761.19	9191.17	9449.78	9047.89
miR-181b-2-5p	8743.38	8223.15	9563.98	9017.04	9058.94	7903.06	9598.35	8720.9	7469.28	6683.28
miR-25-3p	7015.68	9041.02	6717.47	7769.54	7374.73	9679.59	9029.57	7074.35	9194.39	9121.95
miR-106b-5p	9238.82	7797.77	8265.17	6954.49	7881.01	6996.13	6385.58	9663.27	9288.3	9083.22
miR-182-5p	7706.82	9280.4	7729.33	8671.77	8042.85	8861.82	8156.23	7053.73	8134.81	7470.89
Let-7c	7738.43	7147.75	8973.25	7390.47	9468.26	6451.03	7165.15	6462.72	6128.83	6182.93
miR-98	6592.15	6714.34	6857.43	6705.92	6389.48	6135.19	5473.99	7358.44	8261.44	6402.93
miR-92a-1-3p	6057.15	6927.57	6422.52	5686.47	7245.85	6580.52	8631.04	4894.58	5259	6993.62
miR-425-5p	6560.06	6950.6	5787.87	6361.94	6338.24	7274.31	7597.86	4479.43	5443.77	7343.21
miR-92a-2-3p	5985.19	6835.53	6322.27	5604.02	7120.99	6521.49	8561.44	4821.69	5191.77	6855.95
miR-181b-1-5p	6679.91	6285.29	7296.99	6774.88	6790.39	6078.29	7271.1	6326.63	5410.54	4756.41
miR-342-3p	6195.82	6567.1	6803.91	4493.22	6326.5	5377.86	7034.16	2791.76	4106.08	7712.25
miR-99b-5p	6238.47	5711.54	4525.73	3684.7	7411.92	8981.91	5732.48	2420.04	3728.13	4638.07
miR-26a-2-5p	4802.5	4901.17	4795.73	4844.31	4487.64	4858.78	5714.92	5523.11	5198.81	4749.71
miR-26a-1-5p	4800.82	4898.99	4795.3	4842.2	4483.23	4861.75	5714.38	5518.84	5195.34	4745.44
miR-200b-3p	4605.06	5347.46	4816.37	4677.29	4914.85	5220.34	5567.83	4441.7	4299.29	4621.17
miR-15b-5p	3888.68	4270.89	3939.26	3879.41	4312.47	3929.54	4367.94	4025.84	4917.63	4885.74
miR-24-1-3p	3325.96	4226.54	3898.05	3597.78	3539.41	3862.18	3993.29	3591.94	3864.96	3906.6
miR-24-2-3p	3285.68	4182.42	3852.49	3549.7	3494.5	3821.85	3951.71	3547.9	3817.79	3864.13
miR-20a-5p	3839.31	3449.94	3647.99	3340.71	3656.75	3172.96	2938.43	4270.63	3845.96	3719.15
miR-200a-3p	4090.4	3947.47	3349.98	3423.42	3261.99	3531.81	3327.84	3096.92	3193.71	3487.59
miR-27b-3p	3269.41	3517.51	3121.06	3267.45	2853.96	3459.54	3542.74	3072.92	3756.27	3589.89
miR-34a-5p	3116.77	3020.32	3350.9	2786.5	3160.17	2473.04	2620.81	2895.44	2727.71	2744.19
miR-484	3000.05	3082.21	2945.33	2272.44	3352.71	3084.84	3658.62	1619	2158.15	2505.13
miR-17-5p	2683.11	2607.57	2991.7	2463.67	2584.46	2094.73	2228.53	2997.46	2727.2	2816.9
miR-378a-3p	2354.9	2472.27	2732.29	2509.58	2578.42	2588.44	2723.1	2224.54	2348.25	2413.88
miR-342-5p	2454.7	2072.31	2654.58	2169.33	2955.85	2403.12	2483.79	2501.37	2398.93	2542.61
miR-374a-5p	3556.39	2896.06	1948.26	2329.54	2277.43	3126.65	1865.34	1895.89	2136.52	1876.75
miR-423-3p	2030.63	2260.08	2005.29	2126.39	2309.02	2385.04	2732.85	1759.58	1947.39	2079.74
miR-92b-3p	2057.68	2137.73	1998.32	1728.74	2182.17	2238.16	2433.59	1673.45	1865.04	2335.2
miR-7-1-5p	2065.62	2068.63	2020.95	2162.37	2164.25	1762.3	1555.09	2053.9	2143.37	1711.43
miR-7-2-5p	2041.75	2041.08	1995.16	2120	2140.19	1743.26	1532.22	2027.41	2114.25	1682.29
miR-7-3-5p	1998.88	2001.69	1955.4	2077.18	2085.87	1699.74	1500.83	1990.23	2074.4	1648.59
Let-7d-3p	1839.83	1624.79	1681.7	1629.78	2003.85	2174.12	1869.75	1721.94	1995.55	1844.66
miR-1307-3p	1731.84	1616.99	1543.44	1503.36	1880.26	1922.76	2176.43	1418.98	1542.34	1631.08
miR-203	1942.11	1842.97	1597.86	1631.71	1468.88	1955.37	1509.97	1723.09	1650.79	1374.59
miR-193b-3p	1656.18	1554.26	1597.64	1339.48	1644.74	1949.55	2290.93	1278.96	1465.98	1757.68
miR-454-3p	1513.65	1567	1709.87	1700.85	1613.96	1181.65	1359.94	1820.27	1707.84	1482.59
miR-361-5p	1359.42	1318.75	1560.34	1456.98	1510.89	1232.58	1677	1755.28	1543.85	1801.45
miR-106b-3p	1662.1	1540.16	1418.29	1089.1	1791.35	1842.81	1232.73	1178.08	1498.75	1570.99
miR-320a+1	1594.03	1251.65	1697.84	1265.69	1829.03	1411.2	1332.51	1384.21	1339.6	1336.86
miR-30a-5p	1300.74	1461.29	1236.98	1399.98	1245.44	1625.07	1579.48	1378.8	1521.53	1298.28
miR-652-3p	1082.02	1107.53	1256.94	1095.15	1439.61	1258.32	1782.31	1425.19	1533.5	2017.17
miR-375	1230.11	1633.81	1260.82	1432.72	1325.52	1524.79	1735.48	1061.04	1255.27	1329.5
miR-340-5p	1551.32	1216.53	1199.49	1178.88	1104.69	1452.07	1038.21	1368.19	1351.85	1234.78
miR-141-3p	1714.88	1459.93	1271.44	1168.93	1189.31	1411.89	1185.31	913.165	1027.67	1107.59
miR-30e-5p	1342.32	1261.52	939.015	1124.88	1036.94	1385.52	1103.55	977.234	1103.06	1179.86
miR-744-5p	1204.87	1035.73	1286.34	924.899	1275.96	1163.39	1084.87	1102.05	1132.41	975.593
miR-15a-5p	1155.5	1147.73	1189.78	1096.58	1072.76	897.58	967.061	1160.83	1068.89	1178.57
miR-203+1	1273.71	1259.31	974.129	1074.99	918.051	1244.52	1054.97	1015.89	1051.5	828.779
miR-429	1274.95	1123.89	1029.76	1017.7	882.525	1191.97	1185.01	994.05	1010.3	946.486
miR-503	474.282	391.096	519.202	604.055	916.287	1043.01	1059.96	1226.74	1424.34	2923.79
miR-374b-5p	1207.94	1008.91	871.653	975.882	867.564	1037.96	956.677	1185.72	1243.65	885.489
miR-107	994.421	953.943	1014.11	826.473	947.418	962.674	932.447	1188.21	1223.86	1103.13
miR-342-5p+1	989.821	818.358	1013.29	883.476	1186.69	864.773	1019.12	992.954	949.3	1012.21
miR-339-5p	989.565	1050.46	944.286	745.097	956.862	1216.3	1106.43	787.554	910.425	1001.21
miR-671-5p	871.741	868.208	1224.5	764.653	1068.48	834.5	783.879	802.685	909.295	969.704
miR-21-5p+1	1045.63	1018.01	777.078	937.56	817.186	1014.92	776.015	914.408	909.859	708.149
miR-423-5p	890.832	817.337	1166.18	739.608	932.882	802.972	763.631	932.03	949.51	889.678
miR-191-5p	826.739	953.598	872.847	738.714	762.457	933.185	1042.09	812.201	837.077	1033.38
miR-148b-3p	850.971	972.568	987.108	814.802	787.179	788.891	815.126	740.019	861.747	1021.57
miR-296-3p+1	873.602	775.39	989.954	744.544	950.783	860.535	832.257	828.382	885.814	819.683
miR-301a-3p	1037.6	1080.96	888.43	907.008	766.186	820.77	693.816	667.11	655.623	841.264
miR-101-2-3p	997.507	804.194	566.679	812.356	722.166	1145.79	705.055	837.645	837.706	867.544
miR-151a-3p	832.526	971.357	758.19	775.269	772.603	895.688	871.946	596.966	758.095	789.379
miR-101-1-3p	933.539	737.467	524.325	751.989	662.639	1054.04	649.535	776.935	772.209	803.481
miR-29a-3p	891.714	822.982	668.92	765.113	746.068	886.763	902.656	589.188	633.265	661.862
miR-21-5p-1	830.66	834.16	624.53	802.063	687.426	849.638	628.815	709.281	728.592	570.063
miR-421	705.298	739.862	745.875	714.306	606.6	668.287	645.517	689.093	644.642	623.214
miR-425-5p+1	730.748	689.847	652.174	648.669	688.301	792.554	746.347	455.403	576.587	796.34
miR-345-5p	663.483	701.45	673.105	608.168	599.839	612.912	754.982	662.38	667.292	725.276
miR-30c-1-5p	661.385	679.946	590.981	644.042	585.895	650.027	572.878	632.153	701.916	631.397
miR-30c-2-5p	660.741	679.585	590.736	644.042	585.272	650.027	572.861	632.084	701.573	631.399
miR-30b-5p	745.623	727.97	569.818	596.689	536.746	674.535	570.678	612.188	656.385	648.874
miR-486-5p	559.415	483.418	600.005	500.522	825.706	636.881	810.356	512.438	528.786	845.581
miR-186-5p	626.21	642.591	459.715	584.315	555.699	724.524	743.591	479.013	600.541	604.266
miR-99b-3p	580.04	622.189	521.629	577.458	591.397	686.84	698.374	499.095	549.009	462.418
miR-130b-3p	603.341	527.423	680.857	557.873	638.403	512.539	523.071	604.815	555.16	540.198
miR-1307-5p	688.291	599.918	500.125	377.888	523.103	719.422	527.79	414.647	562.062	668.196
miR-342-3p+2	568.151	682.923	619.637	464.622	568.876	516.469	648.185	220.894	332.88	700.147
miR-532-5p	512.113	577.77	485.294	473.851	438.003	564.1	704.887	400.962	500.634	568.301
miR-23b-3p	485.232	610.646	573.297	458.826	438.253	525.54	652.198	419.503	457.6	571.831
miR-877-5p	539.413	429.985	609.549	457.022	538.706	471.872	470.727	520.679	562.008	575.553
miR-93-3p	411.792	524.112	492.404	461.267	439.42	510.448	745.014	367.763	432.483	553.82
miR-95	424.902	467.518	446.402	469.209	479.495	468.196	503.569	457.059	544.791	588.251
miR-653+3	444.49	397.287	386.437	515.937	435.139	391.865	443.62	522.641	570.688	646.541
miR-335-5p	580.94	504.218	500.777	444.434	448.514	552.294	350.299	471.996	467.309	418.877
miR-320a+2	493.861	396.152	584.654	456.168	514.748	442.42	418.465	455.314	436.412	459.462
miR-200c-3p-1	475.228	408.954	477.069	446.676	452.991	393.424	496.569	518.108	431.556	421.213
miR-489	396.469	447.647	418.291	402.947	385.856	410.021	375.375	445.899	562.258	622.736
miR-148a-3p	507.95	544.601	431.281	495.983	371.472	471.461	448.35	335.526	392.287	364.641
miR-101-2-3p-1	536.875	447.63	352.159	413.184	332.14	490.857	381.484	464.11	431.385	474.327
miR-101-1-3p-1	533.364	444.903	350.259	411.726	327.558	483.169	377.371	462.045	426.067	472.345
miR-1180	427.572	370.599	408.335	370.982	463.911	439.729	445.37	397.521	411.705	411.243
miR-193a-5p	434.686	367.012	410.585	343.189	479.846	400.334	471.383	423.298	417.721	397.541
miR-151a-5p	387.472	460.172	392.695	334.087	365.237	469.751	426.429	371.454	416.006	426.345
miR-1275	407.68	374.384	411.414	321.151	325.462	419.138	359.416	434.568	488.695	372.431
miR-1307-3p+1	378.125	384.56	337.106	360.102	415.976	411.277	478.732	324.461	370.168	366.459
miR-424-3p	138.955	161.633	250.698	330.14	490.843	488.817	395.428	387.516	508.999	669.094
miR-151a-3p-2	413.035	471.206	324.225	412.462	368.421	455.492	419.693	286.888	361.615	305.619
miR-152	411.364	475.683	439.749	363.001	351.421	393.793	321.343	351.455	380.239	323.921
miR-769-5p	360.295	373.914	367.396	359.288	327.133	428.101	430.529	339.718	392.615	417.645
miR-423-3p-1	355.126	395.247	341.843	373.493	421.082	413.881	472.939	312.975	341.736	356.094
miR-424-5p	315.89	319.586	228.744	332.39	318.543	382.037	343.713	320.944	390.794	676.748
Let-7a-3-5p-1	359.587	327.686	433.457	370.89	429.345	309.095	328.028	334.051	338.981	372.611
miR-629-5p	345.932	357.759	357.936	363.32	356.642	291.889	352.941	415.322	391.423	340.074
miR-210	369.926	341.81	317.755	275.628	381.963	399.358	301.803	333.493	360.288	464.739
miR-23a-3p	435.187	420.904	351.543	272.473	332.653	442.827	455.002	205.946	275.843	344.543
miR-18a-5p	408.355	376.053	360.502	311.027	332.702	344.734	270.649	382.738	334.689	358.702
miR-324-5p	343.482	293.616	338.389	282.112	333.124	309.616	368.924	331.652	303.394	362.726
miR-140-3p+1	298.341	315.357	357.088	302.236	277.366	306.669	349.98	322.632	309.1	383.021
miR-28-3p	306.556	387.112	287.323	346.787	318.063	337.282	435.471	206.549	265.659	321.344
miR-296-5p	334.431	340.275	357.582	261.751	264.804	293.082	362.842	319.909	320.081	349.116
miR-339-3p	320.669	350.485	316.728	309.006	259.799	359.16	407.864	272.775	287.583	285.757
miR-331-3p	354.954	347.273	327.796	259.998	392.828	308.065	373.302	202.565	243.34	309.667
miR-99a-5p	453.48	391.884	300.81	251.122	327.741	382.738	282.155	133.551	225.912	271.045
miR-27a-3p	371.912	358.727	271.22	273.29	246.692	373.542	319.94	201.425	283.995	284.663
miR-21-3p	393.89	331.068	268.145	235.42	256.993	340.176	342.195	215.444	242.713	274.534
Let-7d-3p+1	271.525	253.515	256.533	234.291	281.65	322.56	284.764	255.807	293.402	281.807
miR-19b-2-3p	357.119	287.089	236.824	241.061	227.182	262.491	235.215	301.908	302.299	279.592
miR-19b-1-3p	353.676	283.61	232.849	236.147	225.472	260.693	232.923	299.619	297.224	275.218
miR-93-5p+1	245.172	235.042	243.331	254.174	282.017	242.821	257.305	251.689	263.189	255.502
miR-1296	255.735	247.63	245.963	191.74	247.311	303.294	297.581	168.966	219.857	326.519
miR-106b-3p-2	250.53	242.514	208.781	194.134	318.516	355.739	285.143	177.678	210.111	241.156
miR-125b-2-5p	312.843	290.885	255.785	190.744	252.416	322.132	284.918	152.736	198.967	206.731
miR-125b-1-5p	311.789	290.675	255.922	189.822	252.299	321.998	283.82	151.923	199.277	206.599
miR-328	241.544	232.652	232.146	206.324	265.115	293.693	275.324	215.398	239.913	221.737
miR-197-3p	243.078	243.066	246.21	196.429	258.816	286.929	274.3	167.49	236.089	239.113
miR-296-3p	229.867	196.259	274.995	213.298	262.912	214.711	226.402	242.378	265.08	257.709
miR-195-5p	223.582	280.27	228.039	225.449	216.05	283.128	200.128	200.698	222.075	240.158
miR-183-5p	270.193	245.948	206.37	160.28	252.855	282.407	261.993	155.922	207.965	213.068
miR-200c-3p+1	222.513	188.853	272.808	225.243	226.799	183.155	229.663	268.26	203.853	202.608
miR-128-1	193.003	228.049	220.339	234.758	188.364	214.83	222.26	213.777	255.646	241.957
miR-1247-5p	129.637	153.175	158.003	153.805	222.272	232.294	266.672	150.279	257.618	438.812
miR-3613-5p	250.472	145.493	160.244	172.405	178.215	235.871	293.029	286.138	240.283	170.675
miR-181b-2-5p-1	217.808	216.349	232.46	225.797	230.254	211.317	244.781	199.854	184.293	163.917
miR-185-5p	205.995	202.959	265.432	198.48	212.594	185.168	174.995	216.639	231.459	229.327
miR-146b-5p	238.418	257.204	191.96	193.305	200.719	218.983	218.244	171.466	186.504	197.92
miR-181d	208.326	188.766	227.467	213.002	213.532	168.021	223.256	214.985	190.432	179.302
miR-320b-2	224.659	162.618	240.246	177.666	250.816	198.695	175.527	193.066	192.979	194.665
miR-320b-1	227.848	166.885	233.623	178.715	246.826	199.392	174.878	192.613	190.966	195.984
miR-320a-1	237.929	163.81	230.467	180.628	252.837	165.981	170.879	192.298	170.979	186.581
miR-4446-3p	238.946	182.776	237.02	165.335	219.601	159.836	178.681	164.929	177.131	168.119
miR-196b-5p	159.122	173.39	196.279	196.387	211.099	176.989	185.925	182.497	189.605	218.264
Let-7b-5p+1	203.954	161.958	210.834	185.005	245.803	183.679	197.43	165.833	165.171	162.164
miR-128-2	166.241	191.815	188.088	206.117	156.611	178.613	189.819	181.215	214.504	205.436
miR-221-3p	165.362	170.721	199.407	184.801	170.832	156.053	195.596	198.816	218.253	185.903
miR-760	192.389	168.458	180.285	159.599	221.068	169.575	173.954	168.299	195.596	205.442
miR-181b-1-5p-1	187.876	186.368	205.071	189.184	208.607	176.539	202.113	168.535	155.652	141.668
Let-7i-5p+1	151.201	173.435	189.069	177.988	195.669	150.686	177.04	172.825	191.183	206.24
miR-140-3p	145.197	180.545	175.017	178.85	175.724	163.254	212.813	160.102	165.412	197.134
miR-19a-3p	229.84	187.293	148.941	171.005	140.086	171.173	138.874	162.236	162.161	164.472
miR-505-3p	135.132	174.381	162.832	146.179	166.96	173.672	152.247	153.805	181.641	192.134
miR-22-3p	190.001	167.689	144.402	154.679	145.143	159.881	202.439	155.939	160.245	136.613
miR-205-5p	166.136	190.356	174.068	163.094	145.259	169.68	207.332	124.103	133.831	119.185
miR-183-5p+1	178.823	174.416	136.939	101.11	181.93	225.76	179.609	101.765	142.661	158.234
miR-3615	156.493	158.641	135.227	140.165	170.037	180.822	166.304	134.156	185.284	148.467
miR-92b-5p	162.508	134.706	156.323	118.895	178.348	130.94	141.667	146.363	147.283	157.525
miR-29c-3p	207.575	167.867	138.514	154.021	138.757	157.813	136.256	122.515	119.984	123.764
miR-200b-5p	141.22	153.868	149.52	120.157	145.628	161.156	148.863	134.828	160.273	136.645
miR-542-3p	139.487	112.175	97.4561	123.729	120.883	170.705	99.1113	156.352	179.25	237.674
miR-497-5p	141.001	154.931	137.965	118.077	133.047	149.289	140.871	133.638	136.792	167.983
Let-7f-1-5p+1	142.037	138.491	151.577	143.18	140.283	133.064	111.898	149.86	160.371	136.164
Let-7f-2-5p+1	141.233	139.125	152.445	145.359	139.558	130.966	112.258	149.854	158.834	135.864
miR-126-3p	147.099	175.823	132.192	156.227	131.965	176.5	148.907	103.73	120.884	102.794
miR-1908	150.411	113.334	150.341	125.546	161.859	126.994	131.164	133.302	150.281	142.112
miR-28-5p	131.793	146.67	127.851	129.173	141.386	151.021	130.106	142.196	135.438	123.42
miR-196a-2-5p	80.3942	87.5063	118.138	129.099	171.36	125.492	135.286	155.831	175.791	164.91
miR-222-3p	126.741	126.654	146.788	114.964	130.654	137.467	126.015	140.941	146.791	145.319
Let-7a-2-5p+1	122.767	122.323	151.585	134.202	137.942	115.907	124.097	132.209	146.388	141.719
Let-7a-1-5p+1	122.547	121.599	149.822	132.507	136.018	118.887	120.931	131.271	144.372	141.451
Let-7a-3-5p+1	121.631	121.229	149.517	131.377	134.5	115.331	120.875	130.978	143.842	141.06
miR-1249	120.783	117.345	125.607	117.279	160.193	136.013	117.015	109.237	139.307	105.455
miR-181b-2-5p+1	128.446	126.946	145.213	142.388	128.087	100.296	137.166	127.913	109.586	101.908
miR-125a-3p	143.861	97.2001	143.522	106.379	151.35	117.365	125.981	122.011	118.333	108.007
miR-365a-3p	123.601	118.246	111.498	108.01	97.6829	114.042	147.166	102.416	115.124	137.83
miR-365b-3p	123.601	118.246	111.498	108.01	97.6829	114.042	147.166	102.416	115.124	137.83
miR-30d-5p+1	98.5986	95.121	100.899	93.544	119.514	124.061	117.739	106.878	109.035	114.949
miR-660-5p	124.741	122.972	88.4041	105.302	88.8798	138.898	120.857	101.908	94.3825	89.4928
miR-194-2-5p	129.47	118.546	108.402	91.3828	103.412	123.454	88.461	97.2402	105.244	102.667
Let-7e-5p+1	106.296	109.194	130.774	100.03	135.666	118.687	99.8634	90.678	92.6212	82.886
miR-25-5p	102.136	82.6625	115.948	98.5673	107.228	109.612	100.724	120.174	102.687	116.806
miR-27b-5p	102.581	104.299	100.792	100.699	96.6505	128.772	98.9872	111.307	110.014	99.7683
miR-92a-1-3p+1	92.1624	110.91	106.229	93.008	135.226	100.01	127.834	79.2791	83.7138	112.156
miR-589-3p	117.35	126.127	102.966	95.2614	115.712	125.107	138.308	61.6775	60.391	82.1109
miR-181a-1-5p+1	89.6382	99.3891	106.284	92.5513	109.492	115.293	115.851	89.3481	104.081	101.97
miR-181a-2-5p+1	89.6382	99.3302	106.284	92.5513	109.492	115.117	115.395	89.3481	104.081	101.986
miR-135a-2-5p	115.546	89.5306	72.8715	87.3464	98.5709	106.769	96.3451	103.414	117.338	134.135
miR-135a-1-5p	115.546	89.1058	72.7153	86.8103	98.5709	105.852	96.0901	103.47	116.75	133.763
miR-181b-1-5p+1	110.04	99.7446	119.354	115.4	105.889	83.1891	113.59	99.337	88.5878	81.3938
miR-3620	101.481	88.9551	106.242	85.3517	158.101	100.371	128.953	77.3109	71.8406	94.87
miR-92a-2-3p+1	87.592	107.468	102.151	91.0864	128.557	99.3038	126.386	75.9914	83.1521	110.662
miR-574-3p	93.719	102.683	114.1	69.7888	111.505	139.24	92.3998	70.7899	100.056	103.251
miR-93-5p-1	89.6452	85.6999	88.5909	97.4843	108.329	118.964	92.5565	100.869	108.949	95.335
Let-7b-5p-1	121.984	85.2947	106.818	100.083	124.514	95.0373	89.3657	90.53	78.6783	80.8998
miR-324-3p-2	80.1029	86.4975	92.511	88.7179	87.3214	100.762	119.673	96.6168	100.964	111.767
miR-361-3p	95.3338	85.5793	87.6233	89.7535	88.7314	112.401	130.824	87.0301	74.7585	95.2519
miR-32-5p	126.884	110.272	85.313	94.987	79.5746	125.622	89.2653	61.7125	81.9387	76.2309
miR-365a-5p	102.72	79.1736	94.0719	74.1587	94.7912	111.061	105.565	89.8867	83.8991	91.1754
miR-196a-1-5p	52.9109	51.7046	75.8595	94.0867	115.498	89.7896	94.0815	110.906	117.94	106.262
miR-9-2-5p	88.186	104.958	69.8874	94.6846	81.0565	101.631	90.8414	92.0874	102.543	78.7567
miR-9-1-5p	88.0887	104.958	69.8874	94.6846	81.0565	101.631	90.8414	91.9713	102.543	78.7567
miR-9-3-5p	88.0887	104.958	69.8874	94.6846	81.0565	101.631	90.8414	91.9713	102.543	78.7567
Let-7d-5p+1	91.7666	89.1757	112.618	90.3275	106.439	55.1	81.4614	96.18	83.7297	87.8254
Let-7g-5p-1	77.6576	90.8028	90.261	89.1261	98.1111	74.9122	94.2685	89.6328	97.884	89.7465
miR-589-5p	87.5751	84.5699	93.8558	72.1468	104.944	94.3126	105.033	64.0648	79.5632	99.2741
miR-125b-2-3p+2	102.056	94.6982	93.4962	83.6947	87.4329	102.516	96.6355	76.3652	78.0868	67.6819
Let-7f-2-5p-1	91.2715	82.4945	88.7137	92.8767	94.2054	71.64	71.5929	93.2294	107.43	84.6652
miR-590-3p	114.215	82.7825	82.2143	68.3749	75.7687	85.4109	73.151	102.421	101.329	91.0115
Let-7g-5p+1	75.0978	83.4318	98.0413	90.3921	85.7055	67.6214	84.3367	94.607	100.134	95.0479
miR-708-5p	78.9218	85.1195	91.7415	81.2263	86.1633	81.1656	90.5229	104.181	87.9838	74.3346
miR-30e-5p+1	105.437	94.0899	66.0619	85.3885	67.6929	99.3823	88.2702	73.5421	83.4762	84.7939
miR-618	75.1947	97.8141	91.2822	63.4419	78.911	85.2764	78.5287	69.4234	97.3451	106.537
Let-7f-1-5p-1	83.671	85.133	81.6666	83.8854	84.3485	84.5013	68.4507	89.3186	96.346	82.6274
miR-193b-5p	90.014	85.5745	97.9057	74.3118	87.9931	70.1516	79.6051	82.7585	75.6412	80.4964
miR-330-3p+2	79.4038	78.8134	89.2685	75.1083	93.952	95.1478	92.3323	77.7282	66.7166	74.1951
miR-326	89.5302	103.072	88.4576	69.1036	88.9492	70.776	87.4796	58.5451	71.7578	86.9234
miR-374a-3p	121.375	89.6781	63.0369	80.0328	64.1587	114.743	68.6257	66.3431	65.4996	67.6609
miR-425-3p-1	60.7644	74.6507	81.3694	78.6663	70.3768	79.9834	114.327	69.3767	74.6651	93.5556
Let-7i-5p-1	62.7417	69.1107	82.0486	78.4776	96.4837	73.5026	74.4076	75.6606	75.4662	98.6136
miR-26b-5p+1	85.0084	80.1699	81.4398	77.4053	73.57	75.753	75.0217	91.5154	76.2892	68.2468
miR-1268b	99.8617	89.4974	83.515	64.4054	105.955	89.2846	87.833	53.143	54.0964	51.064
miR-16-2-5p-1	83.5321	93.5684	75.7607	72.9789	64.9638	83.3	65.4082	73.3984	78.3928	87.0218
miR-425-3p	60.489	68.3232	80.1355	83.7209	60.4934	61.9595	108.545	79.3265	75.5096	94.7247
miR-192-5p	84.8811	102.686	83.1374	85.3569	84.2776	62.647	78.2755	53.6354	57.5323	79.509
Let-7c-1	87.6322	73.0156	94.4446	76.4591	84.062	74.2054	73.2675	72.4032	63.7034	65.8356
miR-3065-5p	86.3005	72.7903	73.1965	78.864	76.4689	75.242	66.1501	79.3681	80.6221	70.3967
Let-7a-1-5p-1	70.9087	73.6026	87.8022	76.48	86.3468	65.2599	71.9555	74.5455	75.3823	76.0761
miR-320c-2	80.8267	65.7422	77.2389	64.5693	99.5529	86.9974	67.2162	66.4329	74.0037	70.8355
miR-1306-5p	77.687	65.286	64.0258	64.1191	84.4995	92.3836	86.5362	67.4479	76.5623	69.7141
miR-1275-2	72.2489	66.1144	81.9813	56.787	75.9278	68.7934	65.3241	87.0449	82.802	76.3055
miR-335-3p	90.1013	73.7768	76.4823	74.6648	69.4179	68.3019	70.7067	61.8313	66.0753	81.3624
miR-149-5p	62.9019	78.2264	76.6813	69.1948	58.5716	66.1345	109.474	59.0328	69.8434	82.5001
miR-378a-3p+1	65.5416	73.3612	74.3704	66.8969	68.8289	79.5219	82.7166	65.8098	69.5852	73.7834
miR-103a-2-3p+2	70.8433	71.853	71.1978	69.9682	61.6305	74.0937	74.8444	77.22	72.9429	72.4354
Let-7a-2-5p-1	59.566	70.7012	78.2955	68.5015	77.1308	66.5565	62.4488	72.4082	81.39	76.0762
miR-29a-3p-1	82.8396	75.5167	68.5641	75.4066	78.4515	87.1051	78.1274	47.878	52.1636	58.4809
miR-182-5p+1	64.7389	81.5043	70.2639	65.6721	70.3614	81.0099	72.957	57.6094	69.1899	68.6507
miR-2110	72.6163	55.5038	85.461	60.6439	82.3095	67.5872	72.9043	76.139	64.8613	58.7254
miR-330-3p+1	67.567	65.5569	71.6502	66.9441	74.9006	90.465	74.2612	63.1514	53.7717	63.0123
miR-103a-1-3p+2	68.7976	68.9217	68.3514	67.6509	60.0853	72.2925	71.5089	72.7468	71.6249	69.2557
miR-320c-1	72.8772	59.3476	73.1593	61.8346	80.201	82.0056	63.2502	59.9706	68.0256	64.4292
miR-190a	75.9409	62.9942	56.4726	69.4606	67.1204	71.2979	41.0721	70.2846	65.8336	67.2287
Let-7d-5p-1	61.3401	66.0097	74.338	60.7628	72.7574	72.6609	50.3757	57.9348	60.9887	66.8798
miR-1301	63.28	61.47	76.6802	54.7917	65.9092	64.1865	74.8653	63.7675	56.338	57.7894
miR-125a-5p-1	64.7379	61.7472	68.0973	53.7683	64.0552	72.2674	96.7459	41.8543	45.2911	59.594
miR-30e-3p	62.9679	68.4479	52.6478	67.0534	57.9141	53.7178	57.5393	65.8293	76.7824	63.4473
miR-181a-1-3p	63.8915	82.3841	60.7627	71.4899	61.1595	62.9393	65.0602	50.5064	57.1328	48.7206
miR-505-3p+1	52.9226	68.8336	63.0898	56.8989	68.2555	52.019	62.3618	56.6742	72.1007	70.3117
miR-16-1-5p-1	57.4202	75.798	57.9379	61.0488	65.2744	67.0811	57.463	53.5066	57.3765	63.3852
miR-340-3p	55.1935	61.8008	60.2848	60.3456	59.0659	65.1755	55.0673	52.0447	79.971	61.6682
miR-23a-5p	76.1726	65.3594	63.5978	62.2511	65.4717	32.9672	65.5409	63.9244	51.3045	63.728
miR-17-5p-1	61.1263	60.5267	63.7885	60.3953	53.3311	48.754	51.1562	71.3106	64.7353	67.7035
miR-103a-2-3p+1	63.2606	53.7638	59.6568	59.6744	60.7319	53.0971	58.5032	61.055	69.2647	59.9157
miR-25-3p+1	56.7115	69.6692	48.7644	53.551	43.1201	64.4508	72.9696	54.1303	64.7082	67.3002
miR-940	60.8529	55.5315	59.1359	53.5142	50.8017	65.5237	76.0285	54.4602	60.412	59.0365
miR-181c-5p	51.8738	53.8934	53.0727	60.6287	46.9683	64.9406	83.4827	56.6274	59.8291	61.3038
miR-103a-1-3p+1	62.597	53.3336	59.0246	57.8709	60.688	52.18	58.0762	60.4634	66.7162	59.6504
miR-181a-1-5p-1	48.3812	57.8287	55.8088	51.2232	80.3886	60.2951	65.9978	52.0245	57.7609	60.793
miR-181a-2-5p-1	48.3812	57.8287	55.7641	51.2232	80.3886	60.2951	65.9978	52.0245	57.7609	60.793
miR-1287	58.2369	52.6953	68.6059	50.971	57.4728	52.4969	60.4655	57.5243	65.7531	59.509
miR-4725-5p	60.2424	41.3534	74.6815	46.1948	76.2301	68.1336	56.9456	56.3927	41.014	59.5279
miR-106b-5p+1	71.3479	60.5905	64.8843	48.9016	51.0498	47.7367	41.4429	70.2447	64.3593	59.174
miR-200b-3p+1	58.692	61.2587	59.4267	60.2035	51.6577	66.5227	62.6387	50.8549	47.2801	58.4601
miR-203-1	60.6343	68.6661	54.2743	54.9972	49.5695	75.1487	51.9601	54.2476	58.097	47.1005
miR-501-5p	51.6758	49.6365	58.929	52.7222	64.3639	45.2888	64.2758	55.3436	53.8091	66.4667
miR-760-1	48.7462	58.1276	60.6283	48.0533	63.9544	54.9039	53.6277	54.3056	59.2419	60.6835
miR-125a-5p+1	56.539	59.51	55.8564	42.7299	58.8967	65.8766	77.0933	41.2962	45.9015	54.1364
miR-218-1-5p	57.2259	62.3912	45.6259	58.0122	50.9219	78.0624	55.8102	59.4181	52.5495	34.8281
miR-15b-3p	50.1036	50.8405	39.2275	52.7433	59.8129	53.646	43.1847	63.634	82.9792	56.4924
miR-365b-5p-1	63.1916	51.4533	71.0624	50.565	60.7143	39.8867	47.4596	54.6589	55.396	51.9636
miR-126-5p	86.8519	82.544	47.0101	51.8362	49.0761	60.9563	50.2868	28.0204	38.6183	49.4883
miR-3187-3p	58.74	48.8296	62.7484	50.1731	60.6749	49.1409	57.9114	52.4149	44.485	49.3403
miR-132-3p	44.5086	56.0968	56.6075	53.6606	40.1595	47.9572	64.6875	53.2652	55.5544	55.6495
miR-324-3p	50.1276	51.0222	59.6514	44.6531	66.9051	47.0169	58.9668	42.9483	49.8844	55.4607
miR-99b-5p+1	53.4563	55.5353	46.8962	36.832	64.6194	104.529	58.8967	22.8327	37.7774	44.9202
miR-218-2-5p	53.4766	58.125	42.789	54.326	49.9214	72.0544	53.6586	56.1855	49.2462	34.123
miR-378c	61.4962	51.2898	55.4722	49.1093	56.3295	58.3345	44.6061	51.1489	45.7032	47.9799
miR-98+1	55.4395	49.2226	51.5341	48.8748	54.3709	50.1849	47.4163	56.9066	59.3867	47.4562
miR-330-3p	53.1166	49.276	56.6343	44.1901	57.0882	60.5042	57.758	50.1277	46.0022	45.8442
miR-941-1	55.1747	59.9909	51.9857	35.6797	69.9235	55.3203	67.7553	29.3344	39.0658	50.1686
miR-941-3	55.1747	59.9909	51.9857	35.6797	69.9235	55.3203	67.7553	29.3344	39.0658	50.1686
miR-941-4	55.1747	59.9909	51.9857	35.6797	69.9235	55.3203	67.7553	29.3344	39.0658	50.1686
miR-32-3p	53.7768	42.4599	65.9548	43.3756	49.4253	46.2956	39.7318	54.2048	63.6551	53.8004
Let-7e-5p-1	50.4259	53.8583	62.4377	51.2459	57.8362	44.8092	49.7359	47.0927	48.6575	44.5543
miR-34a-5p+1	54.5446	54.8677	60.0454	54.2066	44.7574	45.1308	42.1939	59.0712	43.3525	51.8862

## Sheet: Table S4
	Direction cosine coefficient for the seperating hyperpane in each time interval post E2
Gene	0->1	1->2	2->3	3->4	4->5	5->6	6->8	8->12	12->24
SLC7A5	0.304984	0.505786	0.278439	0.0819257	-0.325094	-0.425693	-0.565804	-0.565804	0.193321
TUBA1B	0.0212129	0.0312238	0.113943	0.0317993	0.160014		0.169641	0.169641	0.417626
SCD	-0.00472905	0.0244993	0.126295	0.179909	0.169257	0.353562	0.357727	0.357727	-0.296545
HSPA8	-0.0613604	0.128998	0.356183	0.0116281	-0.072725	0.146283	-0.113509	-0.113509	-0.255342
ZNF217	-0.352836	-0.0398711	0.0393113	-0.0170781	0.0117255	-0.015535	-0.0513324	-0.0513324	0.0266481
KPNA2	-0.00429147	0.0530344	0.0552826	0.0416001	-0.00848422	0.06028	0.0154363	0.0154363	0.347724
TOB1	0.317761	-0.141224	-0.148076	-0.0948196	-0.0388413	0.0147711	0.0201123	0.0201123	-0.00579092
CA12	0.0942428	0.237625	0.0988259	-0.229811	-0.309138	-0.2266	-0.0420438	-0.0420438	0.0233446
STC2	0.301516	0.276136	0.021373	-0.0866675	-0.136426	-0.0602332	-0.066976	-0.066976	-0.0213597
SYTL2	0.0928647	-0.067566	-0.290788	-0.147371	0.0725246	0.103078	-0.0287061	-0.0287061	-0.0412316
CCND1	0.28891	0.138393	-0.0593937	-0.196963	-0.0444222	0.0168327	0.00375682	0.00375682	0.0299778
TUBB	-0.00943884	0.0278535	0.0506819	0.0542856	0.103256	0.12397	0.114621	0.114621	0.285783
TMEM64	0.0330498	0.067216	0.262524	0.101036	0.19486	0.0910979	-0.182383	-0.182383	-0.0919845
CTSD	0.0185845	0.0267559	0.139946	0.0720507	0.262284	0.111994	0.257798	0.257798	-0.0578229
HSPB1	-0.0240809	-0.0337718	0.0284104	0.115687	0.100223	0.241829	0.12085	0.12085	0.0742316
TOP2A	0.00992564	0.00349073	-0.00336996	0.0521489	0.0316355	0.0273393	0.0305897	0.0305897	0.236755
PREX1	0.0359275	0.0422582	0.136967	0.235179	-0.0368076	-0.116964	-0.0788453	-0.0788453	-0.117718
XBP1	0.214887	0.0664715	-0.0402075	-0.202446	-0.210083	0.0568412	-0.0372267	-0.0372267	0.0245439
HSPA5		0.0115697	0.0803211	0.0882652	0.0636316	0.121839	-0.20912	-0.20912	0.04058
CELSR2	0.0298355	0.197302	0.110375	0.195893	0.138191	-0.0849904	-0.0220678	-0.0220678	0.0169939
GREB1	0.0122989	0.159174	0.169029	0.19615	0.104461	0.0125348	0.0683587	0.0683587	0.1134
ELF3	0.191705	-0.0713429	-0.0929405	-0.056158	-0.0276041		0.00449056	0.00449056
COL18A1	-0.00531915	0.0470039	0.10765	0.123705	0.189376	0.0625513	-0.0174688	-0.0174688	-0.0841807
AHNAK	-0.0384415	-0.132649	-0.186766	-0.00732721	0.0242254	-0.0154262	0.0891737	0.0891737	0.100489
MCM7	-0.00871493	0.00678972	0.0367284	0.0656711	0.0942245	0.184878	0.149958	0.149958	-0.0559888
TBX2	0.175262	-0.0342424	-0.0833239	-0.0498241	-0.0444228	0.0217967	0.0119804	0.0119804	0.00907237
SLC3A2	-0.00616539	0.0377563	0.118051	0.130443	0.134936	0.0245926	-0.173997	-0.173997	0.0396734
TXNIP	-0.172359	-0.00636847	0.0248335	0.0283157	0.0303147	0.0287934	-0.00626453	-0.00626453	0.0171954
CD24	0.0079085	-0.0951059	-0.0614828	-0.163804	0.0411906	-0.0737858	-0.01054	-0.01054	-0.0505652
SLC38A2	-0.057441	-0.00834555	0.11881	0.0294102	0.160335	-0.13738	-0.0885966	-0.0885966	-0.0358644
SLC9A3R1	0.107073	0.119099	0.133543	0.0788165	0.0456028	-0.0982797	-0.132328	-0.132328	-0.157018
ESR1	-0.00758211	-0.0647404	-0.156825	-0.0294775	0.100652	0.0697198	0.0148431	0.0148431	0.0116138
TUBB2C	-0.00840713	0.0165503	0.0388971	0.0511791	0.0741765	0.141029	0.0873139	0.0873139	0.155503
CALM1	0.126349	0.124089	0.0528711	-0.152685	-0.103554	-0.144618	-0.0741258	-0.0741258	-0.0498038
FAM102A	0.0422034	0.114123	-0.0265277	-0.145615	-0.0675109	-0.0510063	-0.00942628	-0.00942628	-0.0114982
TFRC	0.0602965	0.0503425	0.031244	-0.145083	-0.0287809	-0.084612	-0.0974371	-0.0974371	0.0509816
WWC1		0.103941	0.116575	-0.0191299	-0.144765	-0.144232	-0.041997	-0.041997	-0.0329719
FLNB		0.091649	0.038214	0.133386	0.0316771	-0.0192039	-0.0884974	-0.0884974	0.00333516
TFF1	0.00821551	0.012045	0.0253154	-0.0254707	-0.0113134	0.0385627	0.0310301	0.0310301	0.131446
VASN	0.130723	-0.0728077	-0.0680521	-0.0256321	-0.00623536		0.00574113	0.00574113
NCOR2	-0.00351004	0.128973	-0.0080194	0.0180049	-0.0728597	-0.0297673	-0.00682993	-0.00682993	-0.0249262
THBS1	0.128343	-0.00892689	0.0305207	-0.0268304	0.0457663	0.0526123	-0.0187682	-0.0187682	0.0512237
TSPYL5	0.0858211	0.055918	-0.0454696	-0.127711	-0.0427727	-0.037725	-0.00686213	-0.00686213	-0.0147765
C14orf43	0.124797	-0.013168	-0.0890272	-0.0567424	-0.0299061	-0.0221028	0.0082939	0.0082939	-0.0100899
PLEC	-0.0428746	-0.0733731	-0.0778535	0.0700699	0.11958	0.00952446	-0.00276398	-0.00276398	0.00776528
MYH9	-0.0439716	-0.04857	-0.115992	-0.0825866	-0.0472665	-0.0120607	-0.0570955	-0.0570955	0.039287
SIAH2	0.0785501	0.0582625	-0.0169889	-0.114995	-0.0488763	-0.0160992	0.0271289	0.0271289	-0.0171872
TPX2		-0.00874345	-0.00687266	0.0315188	0.00310052	0.0483159	0.029064	0.029064	0.114365
KLF10	0.113823	-0.0729992	0.00395253		-0.00608854	0.0118191	0.00393156	0.00393156
CD47	0.0274473		0.0266192	-0.112386	-0.029087	-0.0991545	-0.0296952	-0.0296952	-0.0165136
PIK3R1		-0.0417728	0.110149	0.101812		-0.0590747	-0.0977576	-0.0977576
NEAT1	0.109728	0.0212493	0.0131661	0.0044519	-0.0298446	0.0208166	-0.0258566	-0.0258566	-0.00939288
AKAP1	0.040605	0.0931874	-0.0229572	-0.107893	-0.0996711	-0.023863	-0.0303645	-0.0303645
PARD6B	0.105456	0.0258662	0.0750711	-0.0511805	-0.0500419	-0.0535744	-0.0433355	-0.0433355	0.0205384
RET	0.017629	0.103531	0.0731932	-0.0310854	-0.0550148	-0.0385549	-0.0208623	-0.0208623	-0.0458733
CDV3			0.0232835	0.0565247	0.0415829	0.0951455	-0.00597167	-0.00597167	0.103249
CCDC88C		0.101885	-0.0501465	-0.0890987	-0.045017	-0.0261853	-0.0039165	-0.0039165	-0.00567736
THSD4			-0.019423	0.0369722	0.101039	0.051932	-0.0133392	-0.0133392	-0.00709705
EZR	0.0173721	0.0401893	0.00400625	-0.0650263	-0.100228	-0.0392747	-0.0160874	-0.0160874
SLC6A6	0.0256728	0.0993805	-0.0034461	-0.0172879	-0.0372287	-0.024532	0.00197074	0.00197074	-0.00745479
BRIP1		0.0277303	-0.0241909	0.0646299	0.0991364	0.0411666	0.0940432	0.0940432	-0.0524976
MCM3		-0.00447043	0.0235992	0.0292314	0.0472625	0.0987767	0.0589254	0.0589254	-0.0436359
ERBB3	-0.0182465	-0.0921508	-0.0971127	-0.0257822	0.0275135	0.042668	0.0558417	0.0558417	0.010856
MATN2	0.0527411	-0.0430907	-0.0204023	-0.096978	-0.0922382	-0.0660023	-0.0329334	-0.0329334	0.0304988
SDK2			0.0360178	0.0968073	0.0413042	-0.0397537	-0.0149217	-0.0149217
TPM1	0.0223059	0.0906684	0.0548889	0.0521151	-0.0460803	-0.0147262	-0.0965484	-0.0965484	0.0203893
C10orf18	0.0129562	0.0958695	0.0157647	-0.0291834	-0.0789743	-0.0454858	-0.0464816	-0.0464816	0.00410242
MYBL2	-0.00829725	-0.0049804	0.00950307	0.0243169	0.0187341	0.0646622	0.0958434	0.0958434	0.0135335
IGFBP4	0.0932369	0.0787835	0.081666		-0.0304602	-0.0396616	0.00566594	0.00566594	0.00887962
KIF20A	-0.00356712	-0.00342076	-0.00611707	0.00967604		0.0322168	0.0259706	0.0259706	0.0924979
CCNB1			0.00577851	0.00954256		0.0114605	0.00439197	0.00439197	0.0905587
GPER	-0.0902948	-0.0594614	0.0186759	0.0138839	0.0389074	0.0207716	0.0243407	0.0243407	-0.0206062
PLK2	-0.0901228	0.00647388	0.0143437	-0.00454795	0.0289029		-0.00255808	-0.00255808	0.00519357
KRT80	0.0409342	0.0181779	-0.089374	-0.0644751	-0.0334001				0.00355207
PLK1	-0.00363668		0.00485226	0.0129528		0.0368438	0.0193296	0.0193296	0.0881202
LMNB1	-0.0105742	-0.00742997	0.0078209	0.0340397	0.0362857	0.0872717	0.0271792	0.0271792	0.049464
JUP	-0.0113297	-0.00835118	-0.0384123	-0.0871821	-0.0246188		-0.0263522	-0.0263522	-0.042239
AGR2		0.00629221	0.00682336	0.0268342	0.0348961	0.0826758	0.0866689	0.0866689
FOSL2	0.0759826	0.0346498	-0.0864291	-0.0536672	-0.0102504	-0.00677508	0.00291401	0.00291401	-0.00465155
HIPK2		0.0274153	0.0199176	0.0759208	0.0154376	-0.0856496	-0.0438916	-0.0438916
NPY1R	0.0106183	0.0265645	0.0854754	0.0472828	0.0447157	-0.0383262	-0.048558	-0.048558	-0.0108268
HSPA1A		0.013941	0.0195024	-0.00758863	0.0715899	0.0850526	-0.0245304	-0.0245304	0.0154552
MCM4		0.0116027	0.0331193	0.0318746	0.0829348	0.0493923	0.0189225	0.0189225	-0.0512787
KCNK5	0.0824165	-0.01003	-0.0297122	-0.0319034	-0.0220353		0.00515757	0.00515757
IGF1R	-0.00565794	-0.0133557	0.00755838	0.0822209	0.065568		0.0291351	0.0291351	-0.0122412
SQLE	-0.00891028	0.013464	0.0466733	0.0815775	0.04756	0.0571813	0.0199916	0.0199916
MYOF	0.0142186	0.0587345	0.0199248	0.0370907	0.0319858	0.0815267	0.0244493	0.0244493	-0.0360437
GRHL2	-0.00943324	0.0813658	-0.00438301	-0.0598508	-0.0601502	-0.0187719	-0.0247956	-0.0247956
AURKA	-0.00630301		0.0183456	0.0183406	-0.00767063	0.0175484	0.0128887	0.0128887	0.0809948
IRS1	-0.0313597	-0.0290928	0.0779751	0.0795508	0.0613557		-0.0444939	-0.0444939	0.0188105
NCAPD2		-0.0162842	-0.0151849	0.0146101	0.00685952	0.0463164	0.0405385	0.0405385	0.078345
TFAP2C	0.0775496	-0.0111005	-0.00891248	-0.0420175	-0.0271706	0.0144314	0.0111593	0.0111593
NRIP1	0.0775484	0.0128077	-0.0322669		0.00812995	-0.0121121	-0.036777	-0.036777	0.0126081
PFDN4	0.0109678	0.0290674	0.00748018		0.037089	-0.0766541	-0.0231359	-0.0231359	-0.0212231
LOC728554		0.00778855	0.00902487	0.0163228	0.029832	0.0760195	0.0021568	0.0021568	0.0142176
PGR	0.0164201	0.0758607	0.0507853	0.0562783	-0.00771358	-0.0278491	-0.0109355	-0.0109355
STMN1				0.0227276		0.0344952	0.0437884	0.0437884	0.0752737
HMGB2	0.0113617		-0.0135047	0.0240668	0.0153424	0.0654273	0.0643599	0.0643599	0.0736924
SEMA3C	0.00672522		0.0299814	0.071618	0.038026	0.0515008	-0.0139852	-0.0139852	-0.0390002
SDC4	0.0412928	-0.0284239	-0.0554207	-0.0706371	-0.00740385	0.0160445	0.0189496	0.0189496	-0.0132437
RAB31		0.0328575	0.0418972	0.0504677	0.0705724	0.0438454	-0.015219	-0.015219	-0.0260749
MALAT1		0.0213033	0.0502112	-0.0704616	-0.0488873	0.0458856	0.0021914	0.0021914	0.00484372
EIF3C	-0.0135193	-0.00790932	-0.0403673	-0.0116592	-0.0281873	-0.0703969	0.016774	0.016774	-0.066972
ADCY1	0.00688779	0.0296244	0.0143152	0.0692372	0.0394322	-0.0217947	0.0300003	0.0300003	-0.00888202
P2RY2	0.0552843	0.0587058	-0.0591396	-0.0692083	-0.0662395	-0.0277715	-0.00824984	-0.00824984
ELF1	0.00509183	0.0689062		-0.0182521	-0.0446296	-0.0203675	-0.0147633	-0.0147633	-0.0138975
HSPB8	0.0675233	0.040085	0.0392466	-0.0439847	-0.0666157	-0.0684811	-0.0369814	-0.0369814	-0.0311585
RARA	0.067814	0.00965726	-0.0327929	-0.0205219			-0.00198742	-0.00198742	-0.0117084
CENPF	-0.00412268	-0.00536535	-0.00732163	0.0221151	0.0138331	0.00882999	0.0143809	0.0143809	0.0676705
CKMT1B	-0.00409655		-0.0152252	-0.0672626	-0.00518315	-0.0510048	-0.00335464	-0.00335464	0.00795955
TRIM16	0.0505735	0.01346	-0.0445708	-0.0672257	-0.0357421	-0.00660635	-0.00442692	-0.00442692	-0.00462808
TMEM164		0.0203021	0.0463935	0.0670175	0.0512312	0.0307584			-0.0232109
COL12A1	0.00858624	0.0076923	0.0271669	0.0288611	0.0668321	0.0149594	0.0121176	0.0121176	0.0401351
TSKU	0.0658123	0.00489622	-0.0506696	-0.0551745	-0.0127509		-0.0143981	-0.0143981	-0.00505802
CRABP2	0.00791593	-0.00726933	-0.00845331	-0.0368138	-0.0657259	-0.00938995	-0.0215751	-0.0215751	-0.030044
KIF23		-0.00309455	-0.00368673	0.0154329	0.00678737	0.0178098	0.0136513	0.0136513	0.0654279
CLDN4	0.0415771	-0.0649516	-0.0115646	-0.0139681			-0.00711248	-0.00711248
ZMIZ1	0.0188525	0.0315178		-0.0646898	-0.0491971	-0.0175146
SYT12		0.0524288	0.0448422	-0.0393032	-0.0629533	-0.0644706	-0.0420827	-0.0420827	-0.0141611
AMFR	0.0262047		0.0209279	-0.0417442	-0.00832523		0.0643969	0.0643969	0.0109295
JARID2		0.0341746	0.045092	-0.0171283	-0.0642865	-0.0279241	-0.00882987	-0.00882987
KYNU	0.0102716	-0.020578	-0.0316989	-0.064217		0.00921925	0.0112262	0.0112262	-0.0163051
ANLN		-0.00637291		0.0287853	0.0171107	0.0427477	0.0261532	0.0261532	0.0640626
NBPF1	0.0274867	0.063786			-0.0449524	-0.0144342	-0.020397	-0.020397	0.00521011
ECE1	0.00325276	0.0410263	0.0276079	-0.0290614	-0.0632093	-0.032087	-0.0285203	-0.0285203	-0.00606657
USP31	0.00660501	0.0630891	-0.0217168	-0.0370473	-0.0142213	-0.0211289	-0.00451395	-0.00451395	-0.0042519
CCDC85C		0.0298088	-0.0262997	-0.0626076	-0.0284241	-0.0109673	-0.011199	-0.011199	0.00779129
RACGAP1				0.0184688	-0.00748434	0.0202428	0.0138707	0.0138707	0.0623918
ADCY9		0.0622073	-0.00319396	-0.0132409	-0.0353122	-0.0258997
FOXK1	0.0112147	0.024073	-0.0619714	-0.0179558	0.00589064	-0.0105148	0.00368917	0.00368917
SLC25A24	0.00985526	0.0318412	0.0229984	-0.0614329	-0.0424195	-0.0189713	-0.0220186	-0.0220186	-0.00513834
DLG5	-0.00330824	0.0609884	0.0290582	-0.00650272	-0.0363728	-0.0260844			0.0236931
CALCR		0.00655515	0.0421789	0.0609425	0.0273087	-0.0111441	-0.0294429	-0.0294429	-0.0315033
FKBP4	0.0534307	0.0547332	0.0608604	-0.0366496		0.01818	-0.00693972	-0.00693972	-0.0372483
TIPARP	0.059978	-0.00740008	-0.0262508	-0.0146655	-0.00784685
UNG			0.00998689	0.0238581	0.0489032	0.0597213	0.0204479	0.0204479	-0.0462453
BCL9L	-0.0591988	-0.0501781	0.0216571	0.0257103	0.0262533	0.00782298			-0.0134727
B4GALT1	0.0282857	0.0516467	0.0149728	-0.0377906	-0.0589588	-0.0333517	-0.0243571	-0.0243571	-0.00523325
TIMELESS			0.00594763	0.0149512	0.01869	0.0401178	0.0588219	0.0588219	0.0085741
KITLG	-0.0166607	-0.0584885	0.00556136	0.0101458	0.0141593	-0.0219201	-0.0144474	-0.0144474
NPNT	0.0140121	-0.0402929	-0.0534526	-0.0581454	-0.0237757	-0.0294628	0.00836617	0.00836617	0.00860141
CKMT1A			0.0122291	0.0572381	0.00391755	0.0581323	0.00700661	0.00700661	-0.0136968
PFKFB3	0.057607	-0.0108924	-0.0309445	-0.00981235	-0.0033029		-0.00236206	-0.00236206	-0.00710428
HIF1A	0.0189044	0.0272654	0.0295366	0.0525915	0.0480043	-0.0268286	-0.0572324	-0.0572324	-0.0147892
PIK3R3	-0.0195049	-0.0566326	0.0148661	0.0099574		-0.0127467	-0.013698	-0.013698	-0.00752731
NPIPL3	0.00318409	0.0252187	0.00691325	-0.00720033	0.0560286	0.0485986			-0.0150608
SH3BP5	0.0328775	0.0450786	0.0161278	-0.0322277	-0.0558704	-0.0416913	-0.0141854	-0.0141854	-0.00485228
SOS1		0.0558668		-0.0269157	-0.01943	-0.016111	0.00405345	0.00405345	-0.0054642
SLC2A1	0.0490835	0.0121068	-0.0272482	-0.0554813	-0.02134		0.00250745	0.00250745	-0.0167353
FANCI		-0.00519055			0.00520273	0.0369417	0.0552276	0.0552276	0.0473556
SEMA4C	-0.042785	-0.0551254	0.0236836	0.00909699	0.0154266	0.0327856			-0.0144184
ABCA3	-0.00529987	0.0549825	0.048703	0.0220284	0.0220124	-0.0258599	-0.0351987	-0.0351987	-0.0283841
LONRF2	0.0335706	0.0549575	-0.0174728	-0.0345147	-0.00518119	-0.0225874	0.00691011	0.00691011	-0.00760209
MYO1B		-0.0146608	-0.0548725	-0.0407071		0.022091
JAK1	0.0114206	0.0532305	0.0244856	0.0217366			-0.0541188	-0.0541188	0.00497775
KCNK6	0.0398301	0.0538898	-0.0512289	-0.0510058	-0.0167601	-0.0238968
SVIL		0.012754	0.0537786	0.0136675	-0.0327804	-0.024475	-0.0102184	-0.0102184	0.0135754
C7orf28A	0.014354	-0.0108681	-0.0194727	0.0537726	0.0119263	0.0159388	-0.00652031	-0.00652031	0.0276112
MCM6		0.00673322	0.020756	0.0340967	0.0476734	0.0496545	0.00860988	0.00860988	-0.0536406
CD44	0.00659951	0.00520274	0.00884926	0.0536337	0.0240383	0.0356043	0.0166529	0.0166529
C7orf28B	-0.0154004	0.021819	0.0172987	-0.0533806	-0.0121364	-0.0262233	0.0026686	0.0026686	-0.0348187
NET1	0.0522072	-0.0132353	-0.049281	-0.0223451		0.0156985	0.00673292	0.00673292	0.00641436
PCSK6	0.00998728	-0.0337703	-0.0384795	-0.0522002	-0.011777	-0.0092412	0.0142195	0.0142195	-0.00463656
EPHA4		-0.0515806	0.022375	0.0142522	0.0148602	0.0189109	0.00269319	0.00269319	0.0142763
CBWD3		0.006833	0.00724405	0.0511644	-0.0207744	0.0299412	-0.00960093	-0.00960093	0.00476316
ITGB4	-0.035189	-0.051141	-0.0431248	-0.0242761	0.0190788	0.0179923	0.046461	0.046461	0.00599734
CYP1B1	0.0496022	0.0278626	-0.0203797	-0.05072	-0.0197145	-0.0283685	-0.0112927	-0.0112927
ATP11A	0.00638837	0.026462	0.0244589		-0.0285097	-0.0502022	-0.0256544	-0.0256544
TPD52L1	0.00744516	0.0422044	0.0501853	0.0315624	0.0341089	-0.0257731	-0.0327252	-0.0327252	-0.0283314
UBE2C			0.00320695	0.0113148	0.0110992	0.0172545	0.00715185	0.00715185	0.0498704
DKK1	-0.0479799		0.0493681	0.015756	0.0264035		-0.0318228	-0.0318228	-0.0035507
CXXC5	0.0297597	0.0293803	-0.049112	-0.0290266	-0.00398045	0.00878963	0.0069686	0.0069686	-0.00443697
SPAG5	0.00358836				-0.00789918	0.0235441	0.0203868	0.0203868	0.0489868
ID2	-0.0488462	-0.0192948	0.00338438	0.0107873	0.00995039	0.00877847			-0.00780695
L1CAM	-0.0141053	-0.0227153	-0.0178404	-0.048571		-0.0101085			-0.0057241
DOPEY2		0.0354848	-0.00678055	-0.0248523	-0.0484396	-0.0289996	-0.0233382	-0.0233382
KAZ		0.0322423	-0.00505164	-0.0483812	-0.0191432
IQGAP3			-0.00648781	0.00685395	0.00325699	0.0122239	0.0212352	0.0212352	0.0481686
SMC4			0.0169046	0.0168531	0.028332	0.0141775	-0.00525948	-0.00525948	0.0479674
RBL2	0.00689471	-0.0395309	-0.0477677	-0.0436865	-0.0029181	0.00721815	0.0208919	0.0208919
NBPF16		0.0336552	0.0043541	0.00931177	-0.0254438	0.047513	-0.00427282	-0.00427282
SFXN2	0.00465768	0.00493292	0.00910234	0.00854329	0.0193896	0.0281935	0.0473099	0.0473099	0.013398
ANKRD50	-0.0471594	-0.0298593	0.0380307	0.0257627	0.0193771	-0.0294602	-0.0256755	-0.0256755	0.00409554
RNF213	0.0240102	-0.0184666	-0.0468348	-0.00616616	0.00608222	-0.0213595	0.0242959	0.0242959	-0.00635341
FDFT1		0.00667247	0.0216307	0.0198487		0.0467106	0.0109533	0.0109533	0.00803274
EFEMP1	0.0159118	-0.0274444	-0.0142027	-0.0444679	-0.0466885	-0.0239878
BCAS3	-0.0131404	-0.0432092	-0.0423296	-0.0450345	-0.0466691	-0.00946709	-0.0351436	-0.0351436	0.0100705
SLK	0.00962015	0.044318	-0.0109705	-0.0466015	-0.0314556	-0.0151488	-0.00555324	-0.00555324
LAMA5	-0.0181845	-0.0299797	-0.00379739	0.00599724	0.0465504	0.0377322	0.0264917	0.0264917	-0.00351298
ABAT	0.0135759	0.0383873	0.0274969	-0.0253519	0.0234489	0.00622173	-0.0465118	-0.0465118	-0.0205287
SLC19A2	0.0146895	-0.0102551	0.0462323			-0.024236	-0.0270162	-0.0270162
TK1	-0.00613367		0.00671777	0.00586409	0.0210569	0.0268304	0.0458544	0.0458544	-0.0288258
DHCR7	0.0344951	0.0322971	0.025963		0.00390251	0.0458109	0.036614	0.036614	-0.0374319
INSIG1	-0.00478439	0.00733166	0.0456806	0.0398677			0.0186528	0.0186528	-0.0127375
NUSAP1	0.00326417	-0.00412732		0.00616392	0.00644374	0.00621711	0.00783707	0.00783707	0.0456307
ESPL1		-0.00640143		0.0163026	0.011424	0.0175801	0.0139353	0.0139353	0.0452155
MACF1	0.00590091	-0.00418116	0.0121468	0.0431563	0.03665	-0.044905	-0.0433395	-0.0433395	0.00517611
NOMO3	0.0156444	-0.0135389	0.0109081	-0.0321275	0.0447406	0.0344325	-0.0164384	-0.0164384	0.0145471
ARMCX3	0.00955262	0.0338339	0.0326358	-0.0177735	-0.0287358	-0.0446063	-0.024648	-0.024648	-0.00490051
CSK	0.0164395	0.0277626	0.0189711		-0.0445898	-0.0375896	-0.0215983	-0.0215983	-0.0121954
SOCS3	0.0445407	-0.0185403	-0.0150447	-0.0185827	-0.00675629				-0.00562927
ELOVL2	0.004558	0.0359415	0.0444731	0.00976358	-0.0232055	-0.0385998	-0.00699994	-0.00699994	-0.0165719
RAPGEFL1	0.011935	0.0441915	0.0211776	-0.00703672	-0.0337161		0.014533	0.014533
ABHD2		0.0142868	0.0235578	0.0342861	0.0440684	-0.0239238	-0.0413161	-0.0413161	-0.0138364
MCM2	-0.00547471	-0.00570754	0.0120796	0.0370047	0.0415031	0.0439931	0.0304827	0.0304827	-0.0412847
NAB2	0.0434093	-0.0205869		0.0117771	0.013224		0.00872427	0.00872427
CBFA2T3	0.00416056	0.0428711	-0.0350933	-0.0416769	-0.0184531	0.00545687
NOTCH3	-0.0180607	-0.0428183	-0.0306937	-0.0240477	0.0185897	0.0137969	0.018439	0.018439	-0.01474
ERBB2	-0.0123183	-0.0411794	-0.0366816	-0.0426933		0.00593366	0.00961003	0.00961003
ATAD2		-0.004353	0.039902	0.0426541	0.0386953	0.0164641	0.0299487	0.0299487	-0.022487
MANEAL	0.0195389	0.0313429		-0.0405167	-0.0426071	-0.0339784	-0.0114583	-0.0114583	-0.00587084
MARCKSL1	0.0364147	0.02682	0.0138794	-0.0115435	0.042054	0.00972177	-0.0189193	-0.0189193	-0.0381121
PRR11		-0.00532556	-0.00563022	0.00854348	-0.0057934	0.00870402	0.00852635	0.00852635	0.0419808
CYP1A1	0.0200173	0.0340139	-0.013643	-0.0417324	-0.0342782	-0.0148617	-0.00964055	-0.00964055
METRNL	0.018173	-0.00781292	-0.0416473	-0.0247939	-0.00988859	0.0079213	0.0038243	0.0038243	-0.00363315
CIT		-0.00794862	-0.0111143	0.0101693	0.00948105	0.0209188	0.0203369	0.0203369	0.041328
TRPS1	-0.00465046	-0.0314847	-0.0341984	0.0412856	0.0361518	0.00711369	-0.00963153	-0.00963153	0.00389795
ZNF185		0.0299061	0.0179575	0.0410478	0.0296849		-0.0248704	-0.0248704	-0.0137334
RERE	0.00489759	-0.00636452	-0.0403123		0.0339364	0.00811114	0.00909102	0.00909102
TMPRSS2	0.0348054		-0.0392039	-0.0208484	-0.00561099
GPR89C	0.0116859	0.00503431	-0.0062539	-0.0391304		-0.0273396	0.00767252	0.00767252	0.0236963
UPK3BL	-0.0042664	-0.0386482	0.0212129	-0.0200739	0.0253819		-0.0027915	-0.0027915
C14orf4	0.0202139	-0.0385957	-0.0102671		0.0078491	0.00558707	0.00234211	0.00234211
PITPNC1			0.0151502	0.0381876	0.00717526	0.0179901	0.00698278	0.00698278
CABLES2	0.0106522	0.0381479		-0.0277388	-0.0260337	-0.018398	-0.00604438	-0.00604438
C6orf141	0.0147525	-0.00506921	0.01472	0.0195211	0.0154386	0.0379114	0.0148087	0.0148087	0.0163771
BMP7	-0.00475643	-0.014368	-0.0164015	-0.0378265	0.0060766	0.0150124	0.00765043	0.00765043
EPB41L1		0.015596	0.00597756	-0.00847689	-0.0377874	-0.0216853	-0.00632651	-0.00632651
ANXA9	0.020436	0.0372507		0.0329633	0.0211576		0.0113743	0.0113743	-0.0274627
SPDEF	-0.0169865	-0.0367824	-0.0312945	-0.0164293	-0.00504805		0.00297899	0.00297899	-0.0114856
LDLR		0.0334453	0.0366814	0.0238536	0.0063072	0.00900025	0.0148432	0.0148432	0.011042
HSPH1	-0.013018	0.0292689	0.0365848	0.00914253	-0.0275809	-0.012231	-0.0120539	-0.0120539	-0.0225835
VCL	0.0105141	0.0364619	-0.014245	-0.013425	-0.0305395		-0.0201703	-0.0201703	0.0038551
LOC641298	-0.00767064	0.0165216			0.0361649	-0.0115208	-0.00353662	-0.00353662	-0.00428329
FADS1		0.00418746	0.0163047	0.0176505	0.0360836	0.028004	0.0221097	0.0221097	-0.0183114
KIF21A		0.0287157	-0.013299	-0.0360758	-0.0155545	0.00818091
CBWD6		0.011884	-0.0122299	-0.0360494	0.00310829	-0.0065854	0.00753316	0.00753316
GTF2H2		0.0139102	-0.0061226	-0.0359613		0.0178822
PLEKHA7		0.0106628	0.0127693	-0.00760694	-0.0359539	-0.0204139
PMP22	-0.00590323	-0.0358291	-0.0274629	-0.00429302	0.0154414	0.0207561			-0.0037936
RAB3D	-0.0322994	-0.0354655	-0.0103028	-0.00537615	0.00835579		-0.00489728	-0.00489728
SYTL5			0.0186929	0.0353078	0.0309015	0.019931	-0.00891856	-0.00891856	-0.00534417
ARMCX6	0.0136478	0.019059		-0.0156658	-0.0351638	-0.0235115
OLFM1	0.0196871	0.0347479	0.031406	0.0077687	-0.0275815	-0.0100817	-0.0191161	-0.0191161	0.0035853
H2AFX	-0.0058153		0.00709793	0.0104889	0.0136794	0.0299223	0.0034138	0.0034138	0.0347259
MCM5	-0.00321775		0.00634876	0.0203192	0.0235026	0.0346309	0.0253849	0.0253849	-0.0322297
SLC22A5	0.0159315	0.0282526	0.0120905	-0.0341133	-0.0330748	-0.0198184	-0.0114613	-0.0114613	-0.00851436
CDH3	-0.00675491	-0.0278682	-0.0340516	-0.0311134	-0.00568647	0.0122466	0.0127594	0.0127594
NFKBIL2			0.00588772	0.0127365	0.0340269	0.00847424	0.01866	0.01866	-0.0120448
LRBA	0.0124899		-0.024372	-0.0218509	-0.0238689	-0.033722	-0.011656	-0.011656
MYBL1	0.00811439	0.0333989							0.0134649
TPBG	0.0160805	0.0124832	0.0262961	-0.00667375	0.0333817	-0.01067			0.018394
FDPS			0.00620935	0.00907326		0.0300928	0.0333447	0.0333447	0.00483284
ANK3		-0.00317336	-0.00471466	-0.0138402	-0.0331617	-0.0128534	0.00464378	0.00464378
CHD9	0.00331949	0.0327935	-0.0162282	-0.00910075	-0.00335741	-0.0158255	-0.0131902	-0.0131902
LOC100271836	0.0177114	0.00578687	0.0242179	-0.0116088	-0.0118694	0.032707	-0.0152622	-0.0152622
ZFHX3	-0.00662498	0.0207514	-0.0326714	0.0174176	-0.0117333	-0.0272548	-0.00261078	-0.00261078	-0.00365253
GPR126	0.00525923	-0.0226025	-0.0182159	-0.0188507	0.022834	0.0295427	0.0326504	0.0326504
AFF1		0.0292802		-0.0325431	-0.019016	-0.0124047	-0.00459063	-0.00459063
PRKCD	0.0148943	0.00468383	-0.0241598	-0.0323567	-0.0246344	-0.00705837	0.00479373	0.00479373	-0.00351979
HIST2H2BE	0.00671989	-0.00992129	-0.00458942			-0.0323478	-0.0307137	-0.0307137	-0.006433
DHFR				0.0113815	0.00700585	0.0253411	0.0319859	0.0319859	-0.00914016
GTF2H2B		-0.00698444		0.0202857	0.0118315	-0.0319253	0.00419057	0.00419057
AP1B1		0.0318458	0.0196405	-0.0197644	0.0106614	0.0227186	-0.00730551	-0.00730551	-0.0164423
SYNJ2		0.0318208	-0.0255472	-0.0138963	-0.00597772		-0.00258954	-0.00258954	-0.00757462
POLR2J2	0.00970546	0.031814	-0.0258189	0.0149206	-0.0108215	-0.0307598	0.00492369	0.00492369	-0.00752769
POLR2J3		0.0128872	-0.0109861	0.0316018	-0.00604186	-0.00631453			0.0212674
PDZK1		0.00494536	0.00860112		-0.00375898	0.0314377	0.014975	0.014975	0.029853
AMIGO2	-0.0201691	-0.0271486	0.0128454	0.0125427	0.0311896	0.0293306	0.00370364	0.00370364	0.0192589
YPEL2	0.0183456		-0.0308417	-0.0198641	-0.00416432		0.00225009	0.00225009
TET2			0.0239151	0.0306921	-0.00321739	0.0156542	-0.0164823	-0.0164823
HMGCR	-0.00863974	0.0090042	0.0306092	0.0214384	0.012623	0.0124086	0.0122129	0.0122129	0.0175834
PITPNM2		0.0191275	0.0232459	-0.00478658	-0.0303043	-0.0139627	-0.00307452	-0.00307452
SEMA3F	0.0126973	-0.0156432	-0.0151786	-0.030282	-0.0191911	-0.00916272			-0.00843577
MCF2L		0.0103341	0.0163491	-0.00589979	-0.0301324	-0.0167914	-0.00392967	-0.00392967
CHSY1	0.0269764	0.0158788	-0.0300123	-0.0285754	-0.00710906		0.00705483	0.00705483
BOP1		-0.0107427	0.0121223	0.00822342	-0.0177154	0.0299265	-0.0078855	-0.0078855	-0.0170527
TBKBP1	0.0104735	0.0229173	-0.0143017	-0.0299066	-0.0229528	-0.00965063	-0.00549634	-0.00549634
AIM1		-0.0201596	-0.0296881	-0.0145803	0.00538122	0.00941799	0.0120819	0.0120819
ICOSLG	0.0141252	0.0176827	-0.0296167	-0.0138673	-0.00751765				0.00374286
MARS		0.0286481	0.0231799	0.00422662	-0.00458707	0.0139459	-0.0145869	-0.0145869	0.0139799
PPL	-0.00514932	-0.0232517	-0.0281316	-0.0260855	-0.0163025		0.00762741	0.00762741
RRM2	0.010368	-0.00586211	0.00885814	0.00574222	0.0194984	0.0229593	0.0263469	0.0263469	-0.00956792
